# Supplementary material for: Intravenous Glial Growth Factor 2 (GGF2) Isoform of Neuregulin-1β Improves Left Ventricular Function, Gene and Protein Expression in Rats after Myocardial Infarction
Source: PLoS One. 2013 Feb 21;8(2):e55741. doi: 10.1371/journal.pone.0055741 (PMC3578842; doi:10.1371/journal.pone.0055741)
Supplement: Table S1 — Complete list of genes altered by MI vs. Sham and/or GGF2 treatment. (XLSX) [file pone.0055741.s001.xlsx]

## Sheet: Sig
UNIQID	Name	MI vs. Sham	Early GGF2 vs. MI	GGF2 vs. Sham	MI vs. Sham	NRG vs. MI	NRG vs. Sham	mRNA Accession	Pathway Source	Pathway Name	gene_assignment	mrna_assignment	GO_biological_process	GO_cellular_component	GO_molecular_function	pathway	Fold-Change(Patientvs.Control)	Viral vs. normal	Familial vs. normal	Idiopathic dilated vs. normal	Ischemic vs. normal	LV hypertrophic vs. normal	Postpartum vs. normal	Avg	AS vs. Normal	CCMP vs. Normal	Avg	ischemic EH vs. unused donor	ischemic pre-LVAD vs. unused donor	non-ischemic EH vs. unused donor	non-ischemic pre-LVA vs. unused donor	Avg	idiopathic	Ischemic	Avg	Human	Protein-MI	Protein-GGF2
Aqp7	aquaporin 7 (Aqp7), mRNA.	3.44973	-3.2		3.44973			NM_019157	---	---	NM_019157 // Aqp7 // aquaporin 7 // 5q22 // 29171 /// ENSRNOT00000012975 // Aqp7 // aquaporin 7 // 5q22 // 29171 /// BC072695 // Aqp7 // aquaporin 7 // 5q22 // 29171	NM_019157 // RefSeq // Rattus norvegicus aquaporin 7 (Aqp7), mRNA. // chr5 // 97 // 100 // 30 // 31 // 0 /// ENSRNOT00000012975 // ENSEMBL // Aquaporin-7 gene:ENSRNOG00000009686 // chr5 // 100 // 100 // 31 // 31 // 0 /// BC072695 // GenBank // Rattus norvegicus aquaporin 7, mRNA (cDNA clone MGC:91424 IMAGE:7104684), complete cds. // chr5 // 100 // 100 // 31 // 31 // 0	NM_019157 // GO:0006833 // water transport // inferred from direct assay /// NM_019157 // GO:0006833 // water transport // traceable author statement /// NM_019157 // GO:0007283 // spermatogenesis // inferred from expression pattern /// NM_019157 // GO:0015793 // glycerol transport // inferred from direct assay /// NM_019157 // GO:0015793 // glycerol transport // not recorded /// NM_019157 // GO:…	NM_019157 // GO:0005737 // cytoplasm // inferred from direct assay /// NM_019157 // GO:0005737 // cytoplasm // not recorded /// NM_019157 // GO:0005886 // plasma membrane // inferred from direct assay /// NM_019157 // GO:0005886 // plasma membrane // not recorded /// NM_019157 // GO:0005911 // cell-cell junction // inferred from electronic annotation /// NM_019157 // GO:0005911 // cell-cell junct…	NM_019157 // GO:0005215 // transporter activity // inferred from electronic annotation /// NM_019157 // GO:0015250 // water channel activity // inferred from direct assay /// NM_019157 // GO:0015250 // water channel activity // traceable author statement /// NM_019157 // GO:0015254 // glycerol channel activity // inferred from direct assay /// NM_019157 // GO:0015265 // urea channel activity // i…	---
Abra	actin-binding Rho activating protein (Abra), mRNA.	6.87403	-3.1614	2.17436	6.87403	-3.1614	2.17436	NM_175844	---	---	NM_175844 // Abra // actin-binding Rho activating protein // 7q31 // 286965 /// ENSRNOT00000010539 // Abra // actin-binding Rho activating protein // 7q31 // 286965 /// AF336113 // Abra // actin-binding Rho activating protein // 7q31 // 286965	NM_175844 // RefSeq // Rattus norvegicus actin-binding Rho activating protein (Abra), mRNA. // chr7 // 88 // 100 // 22 // 25 // 0 /// ENSRNOT00000010539 // ENSEMBL // Actin-binding Rho-activating protein gene:ENSRNOG00000007999 // chr7 // 100 // 100 // 25 // 25 // 0 /// AF336113 // GenBank // Rattus norvegicus MS1 mRNA, complete cds. // chr7 // 88 // 100 // 22 // 25 // 0	NM_175844 // GO:0000060 // protein import into nucleus, translocation // inferred from electronic annotation /// NM_175844 // GO:0000060 // protein import into nucleus, translocation // not recorded /// NM_175844 // GO:0015031 // protein transport // inferred from electronic annotation /// NM_175844 // GO:0035025 // positive regulation of Rho protein signal transduction // not recorded /// NM_175…	NM_175844 // GO:0005737 // cytoplasm // inferred from electronic annotation /// NM_175844 // GO:0005886 // plasma membrane // inferred from electronic annotation /// NM_175844 // GO:0005886 // plasma membrane // not recorded /// NM_175844 // GO:0015629 // actin cytoskeleton // not recorded /// NM_175844 // GO:0015629 // actin cytoskeleton // inferred from sequence or structural similarity /// NM_…	NM_175844 // GO:0003713 // transcription coactivator activity // inferred from electronic annotation /// NM_175844 // GO:0003713 // transcription coactivator activity // not recorded /// NM_175844 // GO:0003779 // actin binding // not recorded /// NM_175844 // GO:0003779 // actin binding // inferred from sequence or structural similarity /// ENSRNOT00000010539 // GO:0003713 // transcription coact…	---
Fn3k	fructosamine 3 kinase (Fn3k), mRNA.	3.19067	-2.93956		3.19067	-2.93956		NM_001109051	---	---	NM_001109051 // Fn3k // fructosamine 3 kinase // 10q32.3 // 498034 /// ENSRNOT00000054915 // Fn3k // fructosamine 3 kinase // 10q32.3 // 498034	NM_001109051 // RefSeq // Rattus norvegicus fructosamine 3 kinase (Fn3k), mRNA. // chr10 // 100 // 72 // 18 // 18 // 0 /// ENSRNOT00000054915 // ENSEMBL // Uncharacterized protein gene:ENSRNOG00000036659 // chr10 // 100 // 100 // 25 // 25 // 0	NM_001109051 // GO:0016310 // phosphorylation // not recorded /// NM_001109051 // GO:0030389 // fructosamine metabolic process // not recorded /// ENSRNOT00000054915 // GO:0016310 // phosphorylation // not recorded /// ENSRNOT00000054915 // GO:0030389 // fructosamine metabolic process // not recorded	---	NM_001109051 // GO:0030387 // fructosamine-3-kinase activity // not recorded /// ENSRNOT00000054915 // GO:0030387 // fructosamine-3-kinase activity // not recorded	---		1.50627						1.50627			1.50627					1.50627			1.50627	1.50627
Map1lc3b	microtubule-associated protein 1 light chain 3 beta (Map1lc3b), mRNA.	2.69931	-2.92928		2.69931	-2.92928		NM_022867	---	---	NM_022867 // Map1lc3b // microtubule-associated protein 1 light chain 3 beta // 19q12 // 64862 /// ENSRNOT00000067141 // Map1lc3b // microtubule-associated protein 1 light chain 3 beta // 19q12 // 64862 /// AY392036 // Map1lc3b // microtubule-associated protein 1 light chain 3 beta // 19q12 // 64862 /// ENSRNOT00000051352 // Map1lc3b // microtubule-associated protein 1 light chain 3 beta // 19q12…	NM_022867 // RefSeq // Rattus norvegicus microtubule-associated protein 1 light chain 3 beta (Map1lc3b), mRNA. // chr19 // 100 // 77 // 20 // 20 // 0 /// ENSRNOT00000067141 // ENSEMBL // Isoform 2 of Microtubule-associated proteins 1A/1B light chain 3B gene:ENSRNOG00000017905 // chr19 // 100 // 77 // 20 // 20 // 0 /// AY392036 // GenBank // Rattus norvegicus microtubule-associated protein 1 light…	NM_022867 // GO:0006914 // autophagy // inferred from electronic annotation /// NM_022867 // GO:0032092 // positive regulation of protein binding // inferred from direct assay /// ENSRNOT00000067141 // GO:0006914 // autophagy // inferred from electronic annotation /// ENSRNOT00000067141 // GO:0032092 // positive regulation of protein binding // inferred from direct assay /// AY392036 // GO:000691…	NM_022867 // GO:0000421 // autophagic vacuole membrane // inferred from direct assay /// NM_022867 // GO:0005622 // intracellular // not recorded /// NM_022867 // GO:0005625 // soluble fraction // inferred from direct assay /// NM_022867 // GO:0005626 // insoluble fraction // inferred from direct assay /// NM_022867 // GO:0005737 // cytoplasm // inferred from direct assay /// NM_022867 // GO:0005…	NM_022867 // GO:0005515 // protein binding // not recorded /// NM_022867 // GO:0008017 // microtubule binding // inferred from direct assay /// NM_022867 // GO:0015631 // tubulin binding // inferred from direct assay /// NM_022867 // GO:0019904 // protein domain specific binding // inferred from physical interaction /// ENSRNOT00000067141 // GO:0005515 // protein binding // not recorded /// ENSRN…	---
Sp1	Sp1 transcription factor (Sp1), mRNA.	2.50985	-2.78615		2.50985	-2.78615		NM_012655	---	---	NM_012655 // Sp1 // Sp1 transcription factor // 7q36 // 24790 /// ENSRNOT00000019403 // Sp1 // Sp1 transcription factor // 7q36 // 24790 /// AY305388 // Sp1 // Sp1 transcription factor // 7q36 // 24790	NM_012655 // RefSeq // Rattus norvegicus Sp1 transcription factor (Sp1), mRNA. // chr7 // 100 // 100 // 25 // 25 // 0 /// ENSRNOT00000019403 // ENSEMBL // Transcription factor Sp1 gene:ENSRNOG00000014084 // chr7 // 100 // 100 // 25 // 25 // 0 /// AY305388 // GenBank // Rattus norvegicus transcription factor Sp1 mRNA, partial cds. // chr7 // 69 // 64 // 11 // 16 // 0	NM_012655 // GO:0001503 // ossification // inferred from electronic annotation /// NM_012655 // GO:0001503 // ossification // not recorded /// NM_012655 // GO:0001701 // in utero embryonic development // not recorded /// NM_012655 // GO:0001829 // trophectodermal cell differentiation // inferred from electronic annotation /// NM_012655 // GO:0001829 // trophectodermal cell differentiation // not …	NM_012655 // GO:0005622 // intracellular // inferred from electronic annotation /// NM_012655 // GO:0005634 // nucleus // inferred from direct assay /// NM_012655 // GO:0005634 // nucleus // not recorded /// NM_012655 // GO:0005730 // nucleolus // not recorded /// NM_012655 // GO:0005737 // cytoplasm // inferred from electronic annotation /// NM_012655 // GO:0032993 // protein-DNA complex // infe…	NM_012655 // GO:0003677 // DNA binding // not recorded /// NM_012655 // GO:0003690 // double-stranded DNA binding // inferred from direct assay /// NM_012655 // GO:0003690 // double-stranded DNA binding // not recorded /// NM_012655 // GO:0003700 // sequence-specific DNA binding transcription factor activity // inferred from electronic annotation /// NM_012655 // GO:0003700 // sequence-specific D…	---		-1.54728						-1.54728			-1.54728					-1.54728			-1.54728	-1.54728
Reg3b	regenerating islet-derived 3 beta (Reg3b), mRNA.	4.94859	-2.7		4.94859			NM_053289	---	---	NM_053289 // Reg3b // regenerating islet-derived 3 beta // 4q33-q34 // 24618 /// ENSRNOT00000008212 // Reg3b // regenerating islet-derived 3 beta // 4q33-q34 // 24618 /// S77413 // Reg3b // regenerating islet-derived 3 beta // 4q33-q34 // 24618	NM_053289 // RefSeq // Rattus norvegicus regenerating islet-derived 3 beta (Reg3b), mRNA. // chr4 // 100 // 100 // 28 // 28 // 0 /// ENSRNOT00000008212 // ENSEMBL // regenerating islet-derived protein 3-beta gene:ENSRNOG00000006151 // chr4 // 100 // 100 // 28 // 28 // 0 /// S77413 // GenBank // Rattus norvegicus peptide 23 mRNA, complete cds. // chr4 // 100 // 100 // 28 // 28 // 0	NM_053289 // GO:0006953 // acute-phase response // inferred from electronic annotation /// NM_053289 // GO:0006954 // inflammatory response // inferred from electronic annotation /// ENSRNOT00000008212 // GO:0006953 // acute-phase response // inferred from electronic annotation /// ENSRNOT00000008212 // GO:0006954 // inflammatory response // inferred from electronic annotation /// S77413 // GO:00…	NM_053289 // GO:0005576 // extracellular region // inferred from electronic annotation /// ENSRNOT00000008212 // GO:0005576 // extracellular region // inferred from electronic annotation /// S77413 // GO:0005576 // extracellular region // inferred from electronic annotation	NM_053289 // GO:0005488 // binding // inferred from electronic annotation /// NM_053289 // GO:0005529 // sugar binding // inferred from electronic annotation /// ENSRNOT00000008212 // GO:0005488 // binding // inferred from electronic annotation /// ENSRNOT00000008212 // GO:0005529 // sugar binding // inferred from electronic annotation /// S77413 // GO:0005488 // binding // inferred from electron…	---
Coq3	coenzyme Q3 homolog, methyltransferase (S. cerevisiae) (Coq3), mRNA.	5.09328	-2.68932		5.09328	-2.68932		NM_019187	---	---	NM_019187 // Coq3 // coenzyme Q3 homolog, methyltransferase (S. cerevisiae) // 5q21 // 29309 /// ENSRNOT00000013384 // Coq3 // coenzyme Q3 homolog, methyltransferase (S. cerevisiae) // 5q21 // 29309 /// BC126094 // Coq3 // coenzyme Q3 homolog, methyltransferase (S. cerevisiae) // 5q21 // 29309	NM_019187 // RefSeq // Rattus norvegicus coenzyme Q3 homolog, methyltransferase (S. cerevisiae) (Coq3), mRNA. // chr5 // 93 // 88 // 26 // 28 // 0 /// ENSRNOT00000013384 // ENSEMBL // hexaprenyldihydroxybenzoate methyltransferase gene:ENSRNOG00000009974 // chr5 // 100 // 100 // 32 // 32 // 0 /// BC126094 // GenBank // Rattus norvegicus coenzyme Q3 homolog, methyltransferase (S. cerevisiae), mRNA …	NM_019187 // GO:0006071 // glycerol metabolic process // inferred from electronic annotation /// NM_019187 // GO:0006071 // glycerol metabolic process // not recorded /// NM_019187 // GO:0006744 // ubiquinone biosynthetic process // inferred from mutant phenotype /// NM_019187 // GO:0006744 // ubiquinone biosynthetic process // not recorded /// NM_019187 // GO:0008152 // metabolic process // infe…	NM_019187 // GO:0005739 // mitochondrion // inferred from electronic annotation /// NM_019187 // GO:0005739 // mitochondrion // not recorded /// NM_019187 // GO:0005759 // mitochondrial matrix // inferred from electronic annotation /// ENSRNOT00000013384 // GO:0005739 // mitochondrion // inferred from electronic annotation /// ENSRNOT00000013384 // GO:0005739 // mitochondrion // not recorded /// …	NM_019187 // GO:0004395 // hexaprenyldihydroxybenzoate methyltransferase activity // inferred from mutant phenotype /// NM_019187 // GO:0008168 // methyltransferase activity // inferred from electronic annotation /// NM_019187 // GO:0008425 // 2-polyprenyl-6-methoxy-1,4-benzoquinone methyltransferase activity // inferred from electronic annotation /// NM_019187 // GO:0016740 // transferase activi…	---	4.70737																			4.70737
Tmem126a	transmembrane protein 126A (Tmem126a), mRNA.	3.81377	-2.65566		3.81377	-2.65566		NM_001011557	---	---	NM_001011557 // Tmem126a // transmembrane protein 126A // 1q32 // 293113 /// ENSRNOT00000038333 // Tmem126a // transmembrane protein 126A // 1q32 // 293113 /// BC089104 // Tmem126a // transmembrane protein 126A // 1q32 // 293113	NM_001011557 // RefSeq // Rattus norvegicus transmembrane protein 126A (Tmem126a), mRNA. // chr1 // 100 // 100 // 19 // 19 // 0 /// ENSRNOT00000038333 // ENSEMBL // Transmembrane protein 126A gene:ENSRNOG00000022748 // chr1 // 100 // 100 // 19 // 19 // 0 /// BC089104 // GenBank // Rattus norvegicus transmembrane protein 126A, mRNA (cDNA clone MGC:105688 IMAGE:7307750), complete cds. // chr1 // 10…	NM_001011557 // GO:0008150 // biological_process // no biological data available /// ENSRNOT00000038333 // GO:0008150 // biological_process // no biological data available /// BC089104 // GO:0008150 // biological_process // no biological data available	NM_001011557 // GO:0005575 // cellular_component // no biological data available /// NM_001011557 // GO:0005739 // mitochondrion // not recorded /// NM_001011557 // GO:0005739 // mitochondrion // inferred from sequence or structural similarity /// NM_001011557 // GO:0016020 // membrane // inferred from electronic annotation /// NM_001011557 // GO:0016021 // integral to membrane // inferred from e…	NM_001011557 // GO:0003674 // molecular_function // no biological data available /// ENSRNOT00000038333 // GO:0003674 // molecular_function // no biological data available /// BC089104 // GO:0003674 // molecular_function // no biological data available	---
Psmb6	proteasome (prosome, macropain) subunit, beta type 6 (Psmb6), mRNA.	3.25262	-2.5979		2.81413	-2.5979		NM_057099	---	---	NM_057099 // Psmb6 // proteasome (prosome, macropain) subunit, beta type 6 // 10q24 // 29666 /// ENSRNOT00000026507 // Psmb6 // proteasome (prosome, macropain) subunit, beta type 6 // 10q24 // 29666 /// BC058451 // Psmb6 // proteasome (prosome, macropain) subunit, beta type 6 // 10q24 // 29666	NM_057099 // RefSeq // Rattus norvegicus proteasome (prosome, macropain) subunit, beta type 6 (Psmb6), mRNA. // chr2 // 100 // 69 // 9 // 9 // 0 /// ENSRNOT00000026507 // ENSEMBL // Proteasome subunit beta type-6 gene:ENSRNOG00000019551 // chr2 // 100 // 69 // 9 // 9 // 0 /// BC058451 // GenBank // Rattus norvegicus proteasome (prosome, macropain) subunit, beta type 6, mRNA (cDNA clone MGC:72726 …	NM_057099 // GO:0031145 // anaphase-promoting complex-dependent proteasomal ubiquitin-dependent protein catabolic process // not recorded /// NM_057099 // GO:0051436 // negative regulation of ubiquitin-protein ligase activity involved in mitotic cell cycle // not recorded /// NM_057099 // GO:0051437 // positive regulation of ubiquitin-protein ligase activity involved in mitotic cell cycle // not …	NM_057099 // GO:0005634 // nucleus // inferred from electronic annotation /// NM_057099 // GO:0005737 // cytoplasm // inferred from electronic annotation /// NM_057099 // GO:0005839 // proteasome core complex // inferred from electronic annotation /// ENSRNOT00000026507 // GO:0005634 // nucleus // inferred from electronic annotation /// ENSRNOT00000026507 // GO:0005737 // cytoplasm // inferred fr…	NM_057099 // GO:0004298 // threonine-type endopeptidase activity // inferred from electronic annotation /// NM_057099 // GO:0008233 // peptidase activity // inferred from electronic annotation /// ENSRNOT00000026507 // GO:0004298 // threonine-type endopeptidase activity // inferred from electronic annotation /// ENSRNOT00000026507 // GO:0008233 // peptidase activity // inferred from electronic an…	BC058451 // GenMAPP // Proteasome_Degradation	3.95207																			3.95207
Coq5	coenzyme Q5 homolog, methyltransferase (S. cerevisiae) (Coq5), mRNA.	2.47651	-2.59106		2.47651	-2.59106		NM_001039022	---	---	NM_001039022 // Coq5 // coenzyme Q5 homolog, methyltransferase (S. cerevisiae) // 12q16 // 304542 /// ENSRNOT00000001546 // Coq5 // coenzyme Q5 homolog, methyltransferase (S. cerevisiae) // 12q16 // 304542 /// BC098719 // Coq5 // coenzyme Q5 homolog, methyltransferase (S. cerevisiae) // 12q16 // 304542	NM_001039022 // RefSeq // Rattus norvegicus coenzyme Q5 homolog, methyltransferase (S. cerevisiae) (Coq5), nuclear gene encoding mitochondrial protein, mRNA. // chr12 // 100 // 100 // 27 // 27 // 0 /// ENSRNOT00000001546 // ENSEMBL // Ubiquinone biosynthesis methyltransferase COQ5, mitochondrial gene:ENSRNOG00000001171 // chr12 // 100 // 100 // 27 // 27 // 0 /// BC098719 // GenBank // Rattus norv…	NM_001039022 // GO:0006744 // ubiquinone biosynthetic process // inferred from electronic annotation /// ENSRNOT00000001546 // GO:0006744 // ubiquinone biosynthetic process // inferred from electronic annotation /// BC098719 // GO:0006744 // ubiquinone biosynthetic process // inferred from electronic annotation	NM_001039022 // GO:0005739 // mitochondrion // inferred from electronic annotation /// NM_001039022 // GO:0005739 // mitochondrion // not recorded /// ENSRNOT00000001546 // GO:0005739 // mitochondrion // inferred from electronic annotation /// ENSRNOT00000001546 // GO:0005739 // mitochondrion // not recorded /// BC098719 // GO:0005739 // mitochondrion // inferred from electronic annotation /// BC…	NM_001039022 // GO:0008168 // methyltransferase activity // inferred from electronic annotation /// NM_001039022 // GO:0016740 // transferase activity // inferred from electronic annotation /// ENSRNOT00000001546 // GO:0008168 // methyltransferase activity // inferred from electronic annotation /// ENSRNOT00000001546 // GO:0016740 // transferase activity // inferred from electronic annotation ///…	---		1.64444	1.658		1.70409			1.66884			1.68647					1.68647			1.68647	1.66884
Bphl	biphenyl hydrolase-like (serine hydrolase) (Bphl), mRNA.	2.77256	-2.56298		2.77256	-2.56298		NM_001037206	---	---	NM_001037206 // Bphl // biphenyl hydrolase-like (serine hydrolase) // 17p12 // 361239 /// ENSRNOT00000023914 // Bphl // biphenyl hydrolase-like (serine hydrolase) // 17p12 // 361239 /// BC105908 // Bphl // biphenyl hydrolase-like (serine hydrolase) // 17p12 // 361239	NM_001037206 // RefSeq // Rattus norvegicus biphenyl hydrolase-like (serine hydrolase) (Bphl), mRNA. // chr17 // 100 // 100 // 25 // 25 // 0 /// ENSRNOT00000023914 // ENSEMBL // Biphenyl hydrolase-like gene:ENSRNOG00000017577 // chr17 // 100 // 100 // 25 // 25 // 0 /// BC105908 // GenBank // Rattus norvegicus biphenyl hydrolase-like (serine hydrolase), mRNA (cDNA clone MGC:125077 IMAGE:7388526), …	---	NM_001037206 // GO:0005739 // mitochondrion // inferred from electronic annotation /// NM_001037206 // GO:0005739 // mitochondrion // not recorded /// ENSRNOT00000023914 // GO:0005739 // mitochondrion // inferred from electronic annotation /// ENSRNOT00000023914 // GO:0005739 // mitochondrion // not recorded /// BC105908 // GO:0005739 // mitochondrion // inferred from electronic annotation /// BC…	NM_001037206 // GO:0016787 // hydrolase activity // inferred from electronic annotation /// ENSRNOT00000023914 // GO:0016787 // hydrolase activity // inferred from electronic annotation /// BC105908 // GO:0016787 // hydrolase activity // inferred from electronic annotation	---
Pcna	proliferating cell nuclear antigen (Pcna), mRNA.	2.72017	-2.55219		2.72017	-2.55219		NM_022381	GenMAPP // GenMAPP // GenMAPP	Cell_cycle_KEGG // DNA_replication_Reactome // G1_to_S_cell_cycle_Reactome	NM_022381 // Pcna // proliferating cell nuclear antigen // 3q36 // 25737 /// ENSRNOT00000028887 // Pcna // proliferating cell nuclear antigen // 3q36 // 25737 /// BC060570 // Pcna // proliferating cell nuclear antigen // 3q36 // 25737	NM_022381 // RefSeq // Rattus norvegicus proliferating cell nuclear antigen (Pcna), mRNA. // chr3 // 100 // 91 // 20 // 20 // 0 /// ENSRNOT00000028887 // ENSEMBL // Proliferating cell nuclear antigen gene:ENSRNOG00000021264 // chr3 // 100 // 100 // 22 // 22 // 0 /// BC060570 // GenBank // Rattus norvegicus proliferating cell nuclear antigen, mRNA (cDNA clone MGC:72837 IMAGE:6891516), complete cds…	NM_022381 // GO:0006275 // regulation of DNA replication // inferred from electronic annotation /// NM_022381 // GO:0006287 // base-excision repair, gap-filling // inferred from electronic annotation /// NM_022381 // GO:0006287 // base-excision repair, gap-filling // not recorded /// NM_022381 // GO:0006297 // nucleotide-excision repair, DNA gap filling // not recorded /// NM_022381 // GO:0006298…	NM_022381 // GO:0000307 // cyclin-dependent protein kinase holoenzyme complex // inferred from electronic annotation /// NM_022381 // GO:0000307 // cyclin-dependent protein kinase holoenzyme complex // not recorded /// NM_022381 // GO:0005634 // nucleus // inferred from direct assay /// NM_022381 // GO:0005634 // nucleus // not recorded /// NM_022381 // GO:0005652 // nuclear lamina // inferred fr…	NM_022381 // GO:0000701 // purine-specific mismatch base pair DNA N-glycosylase activity // inferred from electronic annotation /// NM_022381 // GO:0000701 // purine-specific mismatch base pair DNA N-glycosylase activity // not recorded /// NM_022381 // GO:0003677 // DNA binding // inferred from electronic annotation /// NM_022381 // GO:0005515 // protein binding // inferred from physical interac…	NM_022381 // GenMAPP // Cell_cycle_KEGG /// NM_022381 // GenMAPP // DNA_replication_Reactome /// NM_022381 // GenMAPP // G1_to_S_cell_cycle_Reactome /// BC060570 // GenMAPP // Cell_cycle_KEGG /// BC060570 // GenMAPP // DNA_replication_Reactome /// BC060570 // GenMAPP // G1_to_S_cell_cycle_Reactome															1.60594					1.60594
Tufm	Tu translation elongation factor, mitochondrial (Tufm), nuclear gene encoding mitochondrial protein, mRNA.	3.10494	-2.52928		3.10494	-2.52928		NM_001106295	---	---	NM_001106295 // Tufm // Tu translation elongation factor, mitochondrial // 1q36 // 293481	NM_001106295 // RefSeq // Rattus norvegicus Tu translation elongation factor, mitochondrial (Tufm), nuclear gene encoding mitochondrial protein, mRNA. // chr1 // 100 // 90 // 27 // 27 // 0	NM_001106295 // GO:0006414 // translational elongation // not recorded	NM_001106295 // GO:0005622 // intracellular // inferred from electronic annotation /// NM_001106295 // GO:0005739 // mitochondrion // inferred from electronic annotation /// NM_001106295 // GO:0005739 // mitochondrion // not recorded /// NM_001106295 // GO:0005743 // mitochondrial inner membrane // not recorded /// NM_001106295 // GO:0042645 // mitochondrial nucleoid // not recorded	NM_001106295 // GO:0000166 // nucleotide binding // inferred from electronic annotation /// NM_001106295 // GO:0003746 // translation elongation factor activity // inferred from electronic annotation /// NM_001106295 // GO:0003746 // translation elongation factor activity // not recorded /// NM_001106295 // GO:0003924 // GTPase activity // inferred from electronic annotation /// NM_001106295 // G…	---	5.0608																			5.0608
Thg1l	tRNA-histidine guanylyltransferase 1-like (S. cerevisiae) (Thg1l), mRNA.	1.81306	-2.51794			-2.51794		NM_001013966	---	---	NM_001013966 // Thg1l // tRNA-histidine guanylyltransferase 1-like (S. cerevisiae) // 10q21 // 303067 /// ENSRNOT00000007917 // Thg1l // tRNA-histidine guanylyltransferase 1-like (S. cerevisiae) // 10q21 // 303067 /// BC087596 // Thg1l // tRNA-histidine guanylyltransferase 1-like (S. cerevisiae) // 10q21 // 303067	NM_001013966 // RefSeq // Rattus norvegicus tRNA-histidine guanylyltransferase 1-like (S. cerevisiae) (Thg1l), mRNA. // chr10 // 100 // 100 // 26 // 26 // 0 /// ENSRNOT00000007917 // ENSEMBL // Probable tRNA(His) guanylyltransferase gene:ENSRNOG00000005539 // chr10 // 100 // 100 // 26 // 26 // 0 /// BC087596 // GenBank // Rattus norvegicus tRNA-histidine guanylyltransferase 1-like (S. cerevisiae)…	NM_001013966 // GO:0006400 // tRNA modification // inferred from sequence or structural similarity /// ENSRNOT00000007917 // GO:0006400 // tRNA modification // inferred from sequence or structural similarity /// BC087596 // GO:0006400 // tRNA modification // inferred from sequence or structural similarity	NM_001013966 // GO:0005737 // cytoplasm // inferred from sequence or structural similarity /// NM_001013966 // GO:0005739 // mitochondrion // inferred from electronic annotation /// NM_001013966 // GO:0005739 // mitochondrion // not recorded /// ENSRNOT00000007917 // GO:0005737 // cytoplasm // inferred from sequence or structural similarity /// ENSRNOT00000007917 // GO:0005739 // mitochondrion //…	NM_001013966 // GO:0008193 // tRNA guanylyltransferase activity // inferred from sequence or structural similarity /// NM_001013966 // GO:0016740 // transferase activity // inferred from electronic annotation /// NM_001013966 // GO:0016779 // nucleotidyltransferase activity // inferred from electronic annotation /// ENSRNOT00000007917 // GO:0008193 // tRNA guanylyltransferase activity // inferred…	---
Timm17a	translocase of inner mitochondrial membrane 17 homolog A (yeast) (Timm17a), nuclear gene encoding mitochondrial protein, mRNA.	2.4486	-2.50214		3.36363	-2.50214		NM_019351	---	---	NM_019351 // Timm17a // translocase of inner mitochondrial membrane 17 homolog A (yeast) // 13q13 // 54311 /// ENSRNOT00000009398 // Timm17a // translocase of inner mitochondrial membrane 17 homolog A (yeast) // 13q13 // 54311 /// AB006450 // Timm17a // translocase of inner mitochondrial membrane 17 homolog A (yeast) // 13q13 // 54311	NM_019351 // RefSeq // Rattus norvegicus translocase of inner mitochondrial membrane 17 homolog A (yeast) (Timm17a), nuclear gene encoding mitochondrial protein, mRNA. // chr6 // 100 // 81 // 21 // 21 // 0 /// ENSRNOT00000009398 // ENSEMBL // Mitochondrial import inner membrane translocase subunit Tim17-A gene:ENSRNOG00000007040 // chr6 // 85 // 100 // 22 // 26 // 0 /// AB006450 // GenBank // Rat…	NM_019351 // GO:0006886 // intracellular protein transport // inferred from electronic annotation /// NM_019351 // GO:0055085 // transmembrane transport // inferred from electronic annotation /// ENSRNOT00000009398 // GO:0006886 // intracellular protein transport // inferred from electronic annotation /// ENSRNOT00000009398 // GO:0055085 // transmembrane transport // inferred from electronic anno…	NM_019351 // GO:0005739 // mitochondrion // inferred from electronic annotation /// NM_019351 // GO:0005743 // mitochondrial inner membrane // inferred from direct assay /// NM_019351 // GO:0005744 // mitochondrial inner membrane presequence translocase complex // inferred from electronic annotation /// NM_019351 // GO:0016020 // membrane // inferred from electronic annotation /// NM_019351 // GO…	NM_019351 // GO:0005515 // protein binding // inferred from physical interaction /// NM_019351 // GO:0008565 // protein transporter activity // inferred from electronic annotation /// NM_019351 // GO:0015450 // P-P-bond-hydrolysis-driven protein transmembrane transporter activity // inferred from electronic annotation /// NM_019351 // GO:0019899 // enzyme binding // inferred from physical interac…	---						-1.59926		-1.59926		-1.66479	-1.6211				1.67637	-0.536508			0.569931	-0.529227
Mgst3	similar to microsomal glutathione S-transferase 3 gene:ENSRNOG00000004245	4.03652	-2.5		4.03652			ENSRNOT00000005719	---	---	NM_001191594 // Mgst3 // microsomal glutathione S-transferase 3 // 13q24 // 289197 /// ENSRNOT00000005719 // Mgst3 // microsomal glutathione S-transferase 3 // 13q24 // 289197	NM_001191594 // RefSeq // Rattus norvegicus microsomal glutathione S-transferase 3 (Mgst3), mRNA. // chr13 // 100 // 75 // 12 // 12 // 0 /// ENSRNOT00000005719 // ENSEMBL // Uncharacterized protein gene:ENSRNOG00000004245 // chr13 // 100 // 94 // 15 // 15 // 0	NM_001191594 // GO:0010243 // response to organic nitrogen // inferred from expression pattern /// ENSRNOT00000005719 // GO:0010243 // response to organic nitrogen // inferred from expression pattern	NM_001191594 // GO:0005575 // cellular_component // no biological data available /// ENSRNOT00000005719 // GO:0005575 // cellular_component // no biological data available	NM_001191594 // GO:0004602 // glutathione peroxidase activity // inferred from direct assay /// ENSRNOT00000005719 // GO:0004602 // glutathione peroxidase activity // inferred from direct assay	---										-1.55183										-1.55183
Nampt	nicotinamide phosphoribosyltransferase (Nampt), mRNA.	2.77784	-2.49167		2.77784	-2.49167		NM_177928	---	---	NM_177928 // Nampt // nicotinamide phosphoribosyltransferase // 6q16 // 297508 /// ENSRNOT00000013043 // Nampt // nicotinamide phosphoribosyltransferase // 6q16 // 297508 /// AB081730 // Nampt // nicotinamide phosphoribosyltransferase // 6q16 // 297508 /// ENSRNOT00000065260 // Nampt // nicotinamide phosphoribosyltransferase // 6q16 // 297508	NM_177928 // RefSeq // Rattus norvegicus nicotinamide phosphoribosyltransferase (Nampt), mRNA. // chr6 // 100 // 97 // 32 // 32 // 0 /// ENSRNOT00000013043 // ENSEMBL // Nicotinamide phosphoribosyltransferase gene:ENSRNOG00000009754 // chr6 // 100 // 97 // 32 // 32 // 0 /// AB081730 // GenBank // Rattus norvegicus mRNA for pre-B-cell colony-enhancing factor, complete cds. // chr6 // 100 // 97 // …	NM_177928 // GO:0006769 // nicotinamide metabolic process // not recorded /// NM_177928 // GO:0007049 // cell cycle // inferred from expression pattern /// NM_177928 // GO:0007565 // female pregnancy // inferred from expression pattern /// NM_177928 // GO:0008286 // insulin receptor signaling pathway // not recorded /// NM_177928 // GO:0009435 // NAD biosynthetic process // inferred from electron…	NM_177928 // GO:0005634 // nucleus // inferred from direct assay /// NM_177928 // GO:0005737 // cytoplasm // inferred from direct assay /// NM_177928 // GO:0005737 // cytoplasm // inferred from electronic annotation /// NM_177928 // GO:0005737 // cytoplasm // not recorded /// NM_177928 // GO:0005829 // cytosol // not recorded /// ENSRNOT00000013043 // GO:0005634 // nucleus // inferred from direct…	NM_177928 // GO:0004514 // nicotinate-nucleotide diphosphorylase (carboxylating) activity // inferred from electronic annotation /// NM_177928 // GO:0004516 // nicotinate phosphoribosyltransferase activity // inferred from electronic annotation /// NM_177928 // GO:0005125 // cytokine activity // inferred from direct assay /// NM_177928 // GO:0008144 // drug binding // inferred from direct assay /…	---		-1.87837	-1.60017	-1.8314	-1.55284	-2.14287	-1.61009	-1.76929		-3.99086	-2.21319			-1.7591		-2.65438	-1.94995	-1.86981	-2.05831	-2.01855
Slc25a20	solute carrier family 25 (carnitine/acylcarnitine translocase), member 20 (Slc25a20), nuclear gene encoding mitochondrial protein, mRNA.	3.11708	-2.48937		3.11708	-2.48937		NM_053965	GenMAPP // GenMAPP	Fatty_Acid_Degradation // Mitochondrial_fatty_acid_betaoxidation	NM_053965 // Slc25a20 // solute carrier family 25 (carnitine/acylcarnitine translocase), member 20 // 8q32 // 117035 /// ENSRNOT00000027520 // Slc25a20 // solute carrier family 25 (carnitine/acylcarnitine translocase), member 20 // 8q32 // 117035 /// BC081749 // Slc25a20 // solute carrier family 25 (carnitine/acylcarnitine translocase), member 20 // 8q32 // 117035	NM_053965 // RefSeq // Rattus norvegicus solute carrier family 25 (carnitine/acylcarnitine translocase), member 20 (Slc25a20), nuclear gene encoding mitochondrial protein, mRNA. // chr8 // 100 // 100 // 27 // 27 // 0 /// ENSRNOT00000027520 // ENSEMBL // Solute carrier family 25 (Mitochondrial carnitine/acylcarnitine translocase), member 20, isoform CRA_a gene:ENSRNOG00000020288 // chr8 // 100 // …	NM_053965 // GO:0006810 // transport // non-traceable author statement /// NM_053965 // GO:0006853 // carnitine shuttle // not recorded /// NM_053965 // GO:0046320 // regulation of fatty acid oxidation // not recorded /// NM_053965 // GO:0055085 // transmembrane transport // inferred from electronic annotation /// ENSRNOT00000027520 // GO:0006810 // transport // non-traceable author statement ///…	NM_053965 // GO:0005739 // mitochondrion // inferred from electronic annotation /// NM_053965 // GO:0005739 // mitochondrion // not recorded /// NM_053965 // GO:0005743 // mitochondrial inner membrane // not recorded /// NM_053965 // GO:0005743 // mitochondrial inner membrane // traceable author statement /// NM_053965 // GO:0016020 // membrane // inferred from electronic annotation /// NM_053965…	NM_053965 // GO:0005215 // transporter activity // inferred from electronic annotation /// NM_053965 // GO:0005488 // binding // inferred from electronic annotation /// NM_053965 // GO:0015227 // acyl carnitine transporter activity // not recorded /// ENSRNOT00000027520 // GO:0005215 // transporter activity // inferred from electronic annotation /// ENSRNOT00000027520 // GO:0005488 // binding // …	NM_053965 // GenMAPP // Fatty_Acid_Degradation /// NM_053965 // GenMAPP // Mitochondrial_fatty_acid_betaoxidation /// BC081749 // GenMAPP // Fatty_Acid_Degradation /// BC081749 // GenMAPP // Mitochondrial_fatty_acid_betaoxidation		1.53775						1.53775			1.53775					1.53775			1.53775	1.53775
Dbt	dihydrolipoamide branched chain transacylase E2 (Dbt), nuclear gene encoding mitochondrial protein, mRNA.	3.32558	-2.46766		3.32558	-2.46766		NM_053312	---	---	NM_053312 // Dbt // dihydrolipoamide branched chain transacylase E2 // 2q41 // 29611 /// ENSRNOT00000020267 // Dbt // dihydrolipoamide branched chain transacylase E2 // 2q41 // 29611 /// BC101904 // Dbt // dihydrolipoamide branched chain transacylase E2 // 2q41 // 29611	NM_053312 // RefSeq // Rattus norvegicus dihydrolipoamide branched chain transacylase E2 (Dbt), nuclear gene encoding mitochondrial protein, mRNA. // chr2 // 100 // 100 // 33 // 33 // 0 /// ENSRNOT00000020267 // ENSEMBL // dihydrolipoamide branched chain transacylase E2 gene:ENSRNOG00000015029 // chr2 // 100 // 100 // 33 // 33 // 0 /// BC101904 // GenBank // Rattus norvegicus dihydrolipoamide bra…	NM_053312 // GO:0008150 // biological_process // no biological data available /// ENSRNOT00000020267 // GO:0008150 // biological_process // no biological data available /// BC101904 // GO:0008150 // biological_process // no biological data available	NM_053312 // GO:0005575 // cellular_component // no biological data available /// NM_053312 // GO:0005739 // mitochondrion // not recorded /// NM_053312 // GO:0042645 // mitochondrial nucleoid // not recorded /// ENSRNOT00000020267 // GO:0005575 // cellular_component // no biological data available /// ENSRNOT00000020267 // GO:0005739 // mitochondrion // not recorded /// ENSRNOT00000020267 // GO:…	NM_053312 // GO:0003674 // molecular_function // no biological data available /// NM_053312 // GO:0005515 // protein binding // not recorded /// ENSRNOT00000020267 // GO:0003674 // molecular_function // no biological data available /// ENSRNOT00000020267 // GO:0005515 // protein binding // not recorded /// BC101904 // GO:0003674 // molecular_function // no biological data available /// BC101904 /…	---	5.18596		1.77644				1.70265	1.73955			1.7211		1.55587			1.63848			1.59718	2.55523
Egln1	EGL nine homolog 1 (C. elegans) (Egln1), mRNA.	2.33634	-2.43931		2.33634	-2.43931		NM_178334	---	---	AY228140 // Egln1 // EGL nine homolog 1 (C. elegans) // 19q12 // 308913 /// ENSRNOT00000026767 // Egln1 // EGL nine homolog 1 (C. elegans) // 19q12 // 308913 /// BC081694 // Egln1 // EGL nine homolog 1 (C. elegans) // 19q12 // 308913	AY228140 // GenBank // Rattus norvegicus EGLN1 mRNA, complete cds. // chr19 // 100 // 79 // 11 // 11 // 0 /// ENSRNOT00000026767 // ENSEMBL // EGL nine homolog 1 (C. elegans), partial gene:ENSRNOG00000019773 // chr19 // 100 // 100 // 14 // 14 // 0 /// BC081694 // GenBank // Rattus norvegicus EGL nine homolog 1 (C. elegans), mRNA (cDNA clone IMAGE:7189949), partial cds. // chr19 // 100 // 93 // 13…	AY228140 // GO:0001666 // response to hypoxia // inferred from direct assay /// AY228140 // GO:0001666 // response to hypoxia // not recorded /// AY228140 // GO:0032364 // oxygen homeostasis // not recorded /// AY228140 // GO:0043433 // negative regulation of transcription factor activity // not recorded /// AY228140 // GO:0055008 // cardiac muscle tissue morphogenesis // inferred from electronic…	---	AY228140 // GO:0005506 // iron ion binding // inferred from electronic annotation /// AY228140 // GO:0005515 // protein binding // not recorded /// AY228140 // GO:0016702 // oxidoreductase activity, acting on single donors with incorporation of molecular oxygen, incorporation of two atoms of oxygen // inferred from electronic annotation /// AY228140 // GO:0016705 // oxidoreductase activity, actin…	---						-1.64426		-1.64426			-1.64426					-1.64426			-1.64426	-1.64426
Mrpl36	mitochondrial ribosomal protein L36 (Mrpl36), nuclear gene encoding mitochondrial protein, mRNA.	5.11319	-2.43875		5.11319	-2.43875		NM_001108879	---	---	NM_001108879 // Mrpl36 // mitochondrial ribosomal protein L36 // 17p14 // 364656 /// ENSRNOT00000029531 // Mrpl36 // mitochondrial ribosomal protein L36 // 17p14 // 364656 /// BC167015 // Mrpl36 // mitochondrial ribosomal protein L36 // 17p14 // 364656	NM_001108879 // RefSeq // Rattus norvegicus mitochondrial ribosomal protein L36 (Mrpl36), nuclear gene encoding mitochondrial protein, mRNA. // chr17 // 100 // 100 // 26 // 26 // 0 /// ENSRNOT00000029531 // ENSEMBL // 39S ribosomal protein L36, mitochondrial gene:ENSRNOG00000023407 // chr17 // 100 // 100 // 26 // 26 // 0 /// BC167015 // GenBank // Rattus norvegicus mitochondrial ribosomal protein…	NM_001108879 // GO:0006412 // translation // inferred from electronic annotation /// ENSRNOT00000029531 // GO:0006412 // translation // inferred from electronic annotation /// BC167015 // GO:0006412 // translation // inferred from electronic annotation	NM_001108879 // GO:0005622 // intracellular // inferred from electronic annotation /// NM_001108879 // GO:0005739 // mitochondrion // inferred from electronic annotation /// NM_001108879 // GO:0005739 // mitochondrion // not recorded /// NM_001108879 // GO:0005762 // mitochondrial large ribosomal subunit // inferred from electronic annotation /// NM_001108879 // GO:0005762 // mitochondrial large …	NM_001108879 // GO:0003735 // structural constituent of ribosome // inferred from electronic annotation /// ENSRNOT00000029531 // GO:0003735 // structural constituent of ribosome // inferred from electronic annotation /// BC167015 // GO:0003735 // structural constituent of ribosome // inferred from electronic annotation	---
Ap4s1	adaptor-related protein complex AP-4, sigma 1 (Ap4s1), mRNA.	3.76278	-2.43277		3.76278	-2.43277		NM_001130999	---	---	NM_001130999 // Ap4s1 // adaptor-related protein complex AP-4, sigma 1 // 6q22 // 366618 /// BC158697 // Ap4s1 // adaptor-related protein complex AP-4, sigma 1 // 6q22 // 366618 /// ENSRNOT00000007887 // Ap4s1 // adaptor-related protein complex AP-4, sigma 1 // 6q22 // 366618 /// ENSRNOT00000064534 // Ap4s1 // adaptor-related protein complex AP-4, sigma 1 // 6q22 // 366618	NM_001130999 // RefSeq // Rattus norvegicus adaptor-related protein complex AP-4, sigma 1 (Ap4s1), mRNA. // chr6 // 100 // 96 // 26 // 26 // 0 /// BC158697 // GenBank // Rattus norvegicus adaptor-related protein complex AP-4, sigma 1, mRNA (cDNA clone MGC:187750 IMAGE:9026544), complete cds. // chr6 // 100 // 67 // 18 // 18 // 0 /// ENSRNOT00000007887 // ENSEMBL // adaptor-related protein complex…	---	---	NM_001130999 // GO:0005515 // protein binding // inferred from electronic annotation /// NM_001130999 // GO:0008565 // protein transporter activity // inferred from electronic annotation /// BC158697 // GO:0005515 // protein binding // inferred from electronic annotation /// BC158697 // GO:0008565 // protein transporter activity // inferred from electronic annotation /// ENSRNOT00000007887 // GO:…	---
Mrpl15	mitochondrial ribosomal protein L15 (Mrpl15), nuclear gene encoding mitochondrial protein, mRNA.	4.18611	-2.42692	1.72486	4.18611	-2.42692	1.72486	NM_001106633	---	---	NM_001106633 // Mrpl15 // mitochondrial ribosomal protein L15 // 5q12 // 297799 /// ENSRNOT00000011628 // Mrpl15 // mitochondrial ribosomal protein L15 // 5q12 // 297799 /// ENSRNOT00000011619 // Mrpl15 // mitochondrial ribosomal protein L15 // 5q12 // 297799	NM_001106633 // RefSeq // Rattus norvegicus mitochondrial ribosomal protein L15 (Mrpl15), nuclear gene encoding mitochondrial protein, mRNA. // chr5 // 100 // 78 // 21 // 21 // 0 /// ENSRNOT00000011628 // ENSEMBL // Uncharacterized protein gene:ENSRNOG00000008566 // chr5 // 100 // 78 // 21 // 21 // 0 /// ENSRNOT00000011619 // ENSEMBL // Uncharacterized protein gene:ENSRNOG00000008566 // chr5 // 1…	NM_001106633 // GO:0006412 // translation // inferred from electronic annotation /// ENSRNOT00000011628 // GO:0006412 // translation // inferred from electronic annotation /// ENSRNOT00000011619 // GO:0006412 // translation // inferred from electronic annotation	NM_001106633 // GO:0005739 // mitochondrion // not recorded /// NM_001106633 // GO:0005840 // ribosome // inferred from electronic annotation /// NM_001106633 // GO:0015934 // large ribosomal subunit // inferred from electronic annotation /// ENSRNOT00000011628 // GO:0005739 // mitochondrion // not recorded /// ENSRNOT00000011628 // GO:0005840 // ribosome // inferred from electronic annotation //…	NM_001106633 // GO:0003735 // structural constituent of ribosome // inferred from electronic annotation /// ENSRNOT00000011628 // GO:0003735 // structural constituent of ribosome // inferred from electronic annotation /// ENSRNOT00000011619 // GO:0003735 // structural constituent of ribosome // inferred from electronic annotation	---
Lias	lipoic acid synthetase (Lias), nuclear gene encoding mitochondrial protein, mRNA.	2.46819	-2.42466		2.46819	-2.42466		NM_001012037	---	---	NM_001012037 // Lias // lipoic acid synthetase // 14p11 // 305348 /// ENSRNOT00000003779 // Lias // lipoic acid synthetase // 14p11 // 305348 /// BC083708 // Lias // lipoic acid synthetase // 14p11 // 305348	NM_001012037 // RefSeq // Rattus norvegicus lipoic acid synthetase (Lias), nuclear gene encoding mitochondrial protein, mRNA. // chr14 // 100 // 100 // 30 // 30 // 0 /// ENSRNOT00000003779 // ENSEMBL // Lipoyl synthase, mitochondrial gene:ENSRNOG00000002759 // chr14 // 100 // 100 // 30 // 30 // 0 /// BC083708 // GenBank // Rattus norvegicus lipoic acid synthetase, mRNA (cDNA clone MGC:94598 IMAGE…	NM_001012037 // GO:0006954 // inflammatory response // inferred from electronic annotation /// NM_001012037 // GO:0006954 // inflammatory response // not recorded /// NM_001012037 // GO:0006979 // response to oxidative stress // inferred from electronic annotation /// NM_001012037 // GO:0006979 // response to oxidative stress // not recorded /// NM_001012037 // GO:0008150 // biological_process //…	NM_001012037 // GO:0005575 // cellular_component // no biological data available /// NM_001012037 // GO:0005634 // nucleus // inferred from electronic annotation /// NM_001012037 // GO:0005634 // nucleus // not recorded /// NM_001012037 // GO:0005730 // nucleolus // not recorded /// NM_001012037 // GO:0005737 // cytoplasm // inferred from electronic annotation /// NM_001012037 // GO:0005737 // cy…	NM_001012037 // GO:0003674 // molecular_function // no biological data available /// NM_001012037 // GO:0016740 // transferase activity // inferred from electronic annotation /// NM_001012037 // GO:0016992 // lipoate synthase activity // inferred from electronic annotation /// NM_001012037 // GO:0017140 // lipoic acid synthase activity // inferred from electronic annotation /// NM_001012037 // GO…	---	1.68769	1.70554	1.65388	1.63276	1.74332		1.67858	1.68282		-1.50671	0.899501					-0.303604			-0.303604	1.22787
Vegfb	vascular endothelial growth factor B (Vegfb), mRNA.	3.07201	-2.41478		3.07201	-2.41478		NM_053549	---	---	NM_053549 // Vegfb // vascular endothelial growth factor B // 1q43 // 89811 /// ENSRNOT00000050891 // Vegfb // vascular endothelial growth factor B // 1q43 // 89811 /// BC076395 // Vegfb // vascular endothelial growth factor B // 1q43 // 89811	NM_053549 // RefSeq // Rattus norvegicus vascular endothelial growth factor B (Vegfb), mRNA. // chr1 // 100 // 87 // 26 // 26 // 0 /// ENSRNOT00000050891 // ENSEMBL // Isoform VEGF-B167 of Vascular endothelial growth factor B gene:ENSRNOG00000021156 // chr1 // 100 // 87 // 26 // 26 // 0 /// BC076395 // GenBank // Rattus norvegicus vascular endothelial growth factor B, mRNA (cDNA clone MGC:94837 I…	NM_053549 // GO:0001525 // angiogenesis // inferred from expression pattern /// NM_053549 // GO:0001938 // positive regulation of endothelial cell proliferation // not recorded /// NM_053549 // GO:0006493 // protein O-linked glycosylation // not recorded /// NM_053549 // GO:0006916 // anti-apoptosis // not recorded /// NM_053549 // GO:0007507 // heart development // not recorded /// NM_053549 // …	NM_053549 // GO:0005575 // cellular_component // no biological data available /// NM_053549 // GO:0005576 // extracellular region // inferred from electronic annotation /// NM_053549 // GO:0005576 // extracellular region // not recorded /// NM_053549 // GO:0005615 // extracellular space // not recorded /// NM_053549 // GO:0005622 // intracellular // not recorded /// NM_053549 // GO:0016020 // mem…	NM_053549 // GO:0003674 // molecular_function // no biological data available /// NM_053549 // GO:0005515 // protein binding // not recorded /// NM_053549 // GO:0008083 // growth factor activity // inferred from electronic annotation /// NM_053549 // GO:0008201 // heparin binding // inferred from electronic annotation /// NM_053549 // GO:0042056 // chemoattractant activity // not recorded /// NM_…	---	2.79362		1.51112		1.58038			1.54575			1.56306					1.56306			1.56306	1.96171
Hint3	Histidine triad nucleotide-binding protein 3 gene:ENSRNOG00000014190	2.77162	-2.41336		2.77162	-2.41336		ENSRNOT00000019047	---	---	ENSRNOT00000019047 // Hint3 // histidine triad nucleotide binding protein 3 // 1p11 // 246769	ENSRNOT00000019047 // ENSEMBL // Histidine triad nucleotide-binding protein 3 gene:ENSRNOG00000014190 // chr1 // 100 // 100 // 26 // 26 // 0 /// FQ215151 // GenBank // Rattus norvegicus TL0ACA49YI17 mRNA sequence. // chr1 // 96 // 100 // 25 // 26 // 0	---	ENSRNOT00000019047 // GO:0005634 // nucleus // inferred from electronic annotation /// ENSRNOT00000019047 // GO:0005737 // cytoplasm // inferred from electronic annotation	ENSRNOT00000019047 // GO:0016787 // hydrolase activity // inferred from electronic annotation	---		2.2194		2.16424	3.17301			2.51888			2.84595					2.84595			2.84595	2.51888
Hddc3	HD domain containing 3 (Hddc3), mRNA.	3.80875	-2.40866		3.80875	-2.40866		NM_001107528	---	---	NM_001107528 // Hddc3 // HD domain containing 3 // 1q31 // 308758 /// ENSRNOT00000016445 // Hddc3 // HD domain containing 3 // 1q31 // 308758	NM_001107528 // RefSeq // Rattus norvegicus HD domain containing 3 (Hddc3), mRNA. // chr1 // 100 // 100 // 25 // 25 // 0 /// ENSRNOT00000016445 // ENSEMBL // Uncharacterized protein gene:ENSRNOG00000012236 // chr1 // 100 // 100 // 25 // 25 // 0	---	---	NM_001107528 // GO:0003824 // catalytic activity // inferred from electronic annotation /// ENSRNOT00000016445 // GO:0003824 // catalytic activity // inferred from electronic annotation	---
Hspb2	heat shock protein 2 (Hspb2), mRNA.	4.73368	-2.40737	1.96633	4.73368	-2.40737	1.96633	NM_130431	---	---	NM_130431 // Hspb2 // heat shock protein beta 2 // 8q23 // 161476 /// ENSRNOT00000013960 // Hspb2 // heat shock protein beta 2 // 8q23 // 161476	NM_130431 // RefSeq // Rattus norvegicus heat shock protein beta 2 (Hspb2), mRNA. // chr8 // 100 // 100 // 25 // 25 // 0 /// ENSRNOT00000013960 // ENSEMBL // Heat shock protein beta-2 gene:ENSRNOG00000010402 // chr8 // 100 // 100 // 25 // 25 // 0	NM_130431 // GO:0007525 // somatic muscle development // inferred from electronic annotation /// NM_130431 // GO:0007525 // somatic muscle development // not recorded /// NM_130431 // GO:0009408 // response to heat // inferred from direct assay /// ENSRNOT00000013960 // GO:0007525 // somatic muscle development // inferred from electronic annotation /// ENSRNOT00000013960 // GO:0007525 // somatic …	NM_130431 // GO:0005625 // soluble fraction // inferred from electronic annotation /// NM_130431 // GO:0005625 // soluble fraction // not recorded /// NM_130431 // GO:0005634 // nucleus // inferred from sequence or structural similarity /// NM_130431 // GO:0005737 // cytoplasm // inferred from sequence or structural similarity /// ENSRNOT00000013960 // GO:0005625 // soluble fraction // inferred f…	NM_130431 // GO:0005515 // protein binding // inferred from electronic annotation /// NM_130431 // GO:0005515 // protein binding // not recorded /// ENSRNOT00000013960 // GO:0005515 // protein binding // inferred from electronic annotation /// ENSRNOT00000013960 // GO:0005515 // protein binding // not recorded	---		-1.54198					-1.55685	-1.54941			-1.55313					-1.55313			-1.55313	-1.54941
Klhl23	kelch-like 23 (Drosophila) (Klhl23), mRNA.	3.06817	-2.40095		3.06817	-2.40095		NM_001134504	---	---	NM_001134504 // Klhl23 // kelch-like 23 (Drosophila) // 3q21 // 311114 /// ENSRNOT00000010508 // Klhl23 // kelch-like 23 (Drosophila) // 3q21 // 311114	NM_001134504 // RefSeq // Rattus norvegicus kelch-like 23 (Drosophila) (Klhl23), mRNA. // chr3 // 100 // 72 // 18 // 18 // 0 /// ENSRNOT00000010508 // ENSEMBL // Uncharacterized protein gene:ENSRNOG00000007981 // chr3 // 100 // 72 // 18 // 18 // 0	---	---	NM_001134504 // GO:0005515 // protein binding // inferred from electronic annotation /// ENSRNOT00000010508 // GO:0005515 // protein binding // inferred from electronic annotation	---
Acaa2	acetyl-Coenzyme A acyltransferase 2 (Acaa2), nuclear gene encoding mitochondrial protein, mRNA.	3.73346	-2.40072		3.73346	-2.40072		NM_130433	GenMAPP // GenMAPP // GenMAPP	Fatty_Acid_Degradation // Fatty_Acid_Synthesis // Mitochondrial_fatty_acid_betaoxidation	NM_130433 // Acaa2 // acetyl-Coenzyme A acyltransferase 2 // 18q12.3 // 170465 /// ENSRNOT00000067018 // Acaa2 // acetyl-Coenzyme A acyltransferase 2 // 18q12.3 // 170465 /// ENSRNOT00000064093 // Acaa2 // acetyl-Coenzyme A acyltransferase 2 // 18q12.3 // 170465 /// ENSRNOT00000018850 // Acaa2 // acetyl-Coenzyme A acyltransferase 2 // 18q12.3 // 170465	NM_130433 // RefSeq // Rattus norvegicus acetyl-Coenzyme A acyltransferase 2 (Acaa2), nuclear gene encoding mitochondrial protein, mRNA. // chr18 // 91 // 96 // 21 // 23 // 0 /// ENSRNOT00000067018 // ENSEMBL // 3-ketoacyl-CoA thiolase, mitochondrial gene:ENSRNOG00000013766 // chr18 // 100 // 100 // 24 // 24 // 0 /// ENSRNOT00000064093 // ENSEMBL // 3-ketoacyl-CoA thiolase, mitochondrial gene:ENS…	NM_130433 // GO:0006084 // acetyl-CoA metabolic process // inferred from direct assay /// NM_130433 // GO:0006629 // lipid metabolic process // inferred from electronic annotation /// NM_130433 // GO:0006631 // fatty acid metabolic process // inferred from electronic annotation /// NM_130433 // GO:0006635 // fatty acid beta-oxidation // inferred from direct assay /// ENSRNOT00000067018 // GO:0006…	NM_130433 // GO:0005739 // mitochondrion // inferred from direct assay /// NM_130433 // GO:0005739 // mitochondrion // not recorded /// NM_130433 // GO:0005743 // mitochondrial inner membrane // inferred from electronic annotation /// NM_130433 // GO:0005743 // mitochondrial inner membrane // not recorded /// NM_130433 // GO:0005759 // mitochondrial matrix // inferred from direct assay /// NM_130…	NM_130433 // GO:0003824 // catalytic activity // inferred from electronic annotation /// NM_130433 // GO:0003988 // acetyl-CoA C-acyltransferase activity // inferred from direct assay /// NM_130433 // GO:0008415 // acyltransferase activity // inferred from electronic annotation /// NM_130433 // GO:0016740 // transferase activity // inferred from electronic annotation /// NM_130433 // GO:0016747 /…	NM_130433 // GenMAPP // Fatty_Acid_Degradation /// NM_130433 // GenMAPP // Fatty_Acid_Synthesis /// NM_130433 // GenMAPP // Mitochondrial_fatty_acid_betaoxidation				1.61355				1.61355		-2.1037	-0.245075				-2.0746	-1.47446			-1.77453	-0.854917
Cetn2	similar to centrin 2 gene:ENSRNOG00000017059	5.39563	-2.4		5.39563			ENSRNOT00000022941	---	---	ENSRNOT00000065164 // Cetn2 // centrin 2 // Xq37.1-q37.2 // 84593 /// ENSRNOT00000022941 // Cetn2 // centrin 2 // Xq37.1-q37.2 // 84593	ENSRNOT00000065164 // ENSEMBL // centrin 2 gene:ENSRNOG00000017059 // chrX // 100 // 80 // 20 // 20 // 0 /// ENSRNOT00000022941 // ENSEMBL // Uncharacterized protein gene:ENSRNOG00000017059 // chrX // 100 // 64 // 16 // 16 // 0 /// FQ219097 // GenBank // Rattus norvegicus TL0ABA47YL14 mRNA sequence. // chrX // 92 // 100 // 23 // 25 // 0	ENSRNOT00000065164 // GO:0007099 // centriole replication // inferred from electronic annotation /// ENSRNOT00000065164 // GO:0007099 // centriole replication // not recorded /// ENSRNOT00000065164 // GO:0007283 // spermatogenesis // inferred from electronic annotation /// ENSRNOT00000065164 // GO:0007283 // spermatogenesis // not recorded /// ENSRNOT00000065164 // GO:0032465 // regulation of cyt…	ENSRNOT00000065164 // GO:0005622 // intracellular // inferred from electronic annotation /// ENSRNOT00000065164 // GO:0005622 // intracellular // not recorded /// ENSRNOT00000065164 // GO:0005813 // centrosome // inferred from direct assay /// ENSRNOT00000065164 // GO:0005813 // centrosome // not recorded /// ENSRNOT00000065164 // GO:0005814 // centriole // inferred from electronic annotation ///…	ENSRNOT00000065164 // GO:0005509 // calcium ion binding // inferred from electronic annotation /// ENSRNOT00000065164 // GO:0005515 // protein binding // inferred from electronic annotation /// ENSRNOT00000065164 // GO:0005515 // protein binding // not recorded /// ENSRNOT00000065164 // GO:0031683 // G-protein beta/gamma-subunit binding // inferred from electronic annotation /// ENSRNOT0000006516…	---													1.54843		1.96239					1.75541
Guk1	guanylate kinase 1 (Guk1), mRNA.	2.44643	-2.4		2.44643			NM_001013115	---	---	NM_001013115 // Guk1 // guanylate kinase 1 // 10q22 // 303179 /// ENSRNOT00000003926 // Guk1 // guanylate kinase 1 // 10q22 // 303179 /// AF354443 // Guk1 // guanylate kinase 1 // 10q22 // 303179	NM_001013115 // RefSeq // Rattus norvegicus guanylate kinase 1 (Guk1), mRNA. // chr10 // 100 // 100 // 42 // 42 // 0 /// ENSRNOT00000003926 // ENSEMBL // guanylate kinase 1 gene:ENSRNOG00000002928 // chr10 // 100 // 100 // 42 // 42 // 0 /// AF354443 // GenBank // Rattus norvegicus guanylate kinase mRNA, complete cds. // chr10 // 100 // 100 // 42 // 42 // 0	NM_001013115 // GO:0006163 // purine nucleotide metabolic process // inferred from electronic annotation /// NM_001013115 // GO:0006163 // purine nucleotide metabolic process // not recorded /// NM_001013115 // GO:0046939 // nucleotide phosphorylation // not recorded /// ENSRNOT00000003926 // GO:0006163 // purine nucleotide metabolic process // inferred from electronic annotation /// ENSRNOT00000…	---	NM_001013115 // GO:0004385 // guanylate kinase activity // inferred from electronic annotation /// NM_001013115 // GO:0004385 // guanylate kinase activity // not recorded /// NM_001013115 // GO:0016301 // kinase activity // inferred from electronic annotation /// NM_001013115 // GO:0016740 // transferase activity // inferred from electronic annotation /// ENSRNOT00000003926 // GO:0004385 // guany…	---															1.50863					1.50863
Mrpl50	mitochondrial ribosomal protein L50 (Mrpl50), nuclear gene encoding mitochondrial protein, mRNA.	8.66848	-2.4	3.57329	8.66848			NM_001108665	---	---	NM_001108665 // Mrpl50 // mitochondrial ribosomal protein L50 // 5q22 // 362517 /// ENSRNOT00000009678 // Mrpl50 // mitochondrial ribosomal protein L50 // 5q22 // 362517	NM_001108665 // RefSeq // Rattus norvegicus mitochondrial ribosomal protein L50 (Mrpl50), nuclear gene encoding mitochondrial protein, mRNA. // chr5 // 100 // 100 // 13 // 13 // 0 /// ENSRNOT00000009678 // ENSEMBL // Uncharacterized protein gene:ENSRNOG00000007328 // chr5 // 100 // 100 // 13 // 13 // 0	---	NM_001108665 // GO:0005739 // mitochondrion // inferred from electronic annotation /// NM_001108665 // GO:0005739 // mitochondrion // not recorded /// NM_001108665 // GO:0005840 // ribosome // inferred from electronic annotation /// ENSRNOT00000009678 // GO:0005739 // mitochondrion // inferred from electronic annotation /// ENSRNOT00000009678 // GO:0005739 // mitochondrion // not recorded /// ENS…	---	---
Prdx3	peroxiredoxin 3 (Prdx3), nuclear gene encoding mitochondrial protein, mRNA.	4.72324	-2.39954	1.96839	4.72324	-2.39954	1.96839	NM_022540	---	---	NM_022540 // Prdx3 // peroxiredoxin 3 // 1q55 // 64371 /// ENSRNOT00000015186 // Prdx3 // peroxiredoxin 3 // 1q55 // 64371 /// BC060567 // Prdx3 // peroxiredoxin 3 // 1q55 // 64371	NM_022540 // RefSeq // Rattus norvegicus peroxiredoxin 3 (Prdx3), nuclear gene encoding mitochondrial protein, mRNA. // chr1 // 96 // 89 // 23 // 24 // 0 /// ENSRNOT00000015186 // ENSEMBL // Thioredoxin-dependent peroxide reductase, mitochondrial gene:ENSRNOG00000010958 // chr1 // 100 // 100 // 27 // 27 // 0 /// BC060567 // GenBank // Rattus norvegicus peroxiredoxin 3, mRNA (cDNA clone MGC:72824 …	NM_022540 // GO:0001893 // maternal placenta development // inferred from electronic annotation /// NM_022540 // GO:0001893 // maternal placenta development // not recorded /// NM_022540 // GO:0006979 // response to oxidative stress // inferred from electronic annotation /// NM_022540 // GO:0006979 // response to oxidative stress // not recorded /// NM_022540 // GO:0007005 // mitochondrion organi…	NM_022540 // GO:0005737 // cytoplasm // inferred from electronic annotation /// NM_022540 // GO:0005737 // cytoplasm // not recorded /// NM_022540 // GO:0005739 // mitochondrion // inferred from direct assay /// NM_022540 // GO:0005739 // mitochondrion // not recorded /// NM_022540 // GO:0005769 // early endosome // inferred from electronic annotation /// NM_022540 // GO:0005769 // early endosome…	NM_022540 // GO:0003674 // molecular_function // no biological data available /// NM_022540 // GO:0004601 // peroxidase activity // inferred from electronic annotation /// NM_022540 // GO:0005515 // protein binding // not recorded /// NM_022540 // GO:0008022 // protein C-terminus binding // inferred from electronic annotation /// NM_022540 // GO:0008022 // protein C-terminus binding // not record…	---										-1.82997										-1.82997
Actg2	actin, gamma 2, smooth muscle, enteric (Actg2), mRNA.		-2.37935	-1.707		-2.37935	-1.707	NM_012893	---	---	NM_012893 // Actg2 // actin, gamma 2, smooth muscle, enteric // 4q34 // 25365 /// ENSRNOT00000042699 // Actg2 // actin, gamma 2, smooth muscle, enteric // 4q34 // 25365 /// BC087689 // Actg2 // actin, gamma 2, smooth muscle, enteric // 4q34 // 25365 /// ENSRNOT00000050380 // Actg2 // actin, gamma 2, smooth muscle, enteric // 4q34 // 25365	NM_012893 // RefSeq // Rattus norvegicus actin, gamma 2, smooth muscle, enteric (Actg2), mRNA. // chr4 // 100 // 91 // 32 // 32 // 0 /// ENSRNOT00000042699 // ENSEMBL // Actin, gamma-enteric smooth muscle gene:ENSRNOG00000029401 // chr4 // 100 // 91 // 32 // 32 // 0 /// BC087689 // GenBank // Rattus norvegicus actin, gamma 2, smooth muscle, enteric, mRNA (cDNA clone MGC:105507 IMAGE:7310913), com…	NM_012893 // GO:0006936 // muscle contraction // not recorded /// ENSRNOT00000042699 // GO:0006936 // muscle contraction // not recorded /// BC087689 // GO:0006936 // muscle contraction // not recorded /// ENSRNOT00000050380 // GO:0006936 // muscle contraction // not recorded	NM_012893 // GO:0005737 // cytoplasm // inferred from electronic annotation /// NM_012893 // GO:0005856 // cytoskeleton // inferred from electronic annotation /// ENSRNOT00000042699 // GO:0005737 // cytoplasm // inferred from electronic annotation /// ENSRNOT00000042699 // GO:0005856 // cytoskeleton // inferred from electronic annotation /// BC087689 // GO:0005737 // cytoplasm // inferred from el…	NM_012893 // GO:0000166 // nucleotide binding // inferred from electronic annotation /// NM_012893 // GO:0005515 // protein binding // inferred from electronic annotation /// NM_012893 // GO:0005524 // ATP binding // inferred from electronic annotation /// ENSRNOT00000042699 // GO:0000166 // nucleotide binding // inferred from electronic annotation /// ENSRNOT00000042699 // GO:0005515 // protein …	---	-7.60474	-1.53854	-1.57552			-1.68833		-1.6008	1.5455	2.08213	0.0846258					1.08338			1.08338	-1.46325
Ppil3	peptidylprolyl isomerase (cyclophilin)-like 3 (Ppil3), mRNA.	2.37838	-2.36365		2.37838	-2.36365		NM_175707	---	---	NM_175707 // Ppil3 // peptidylprolyl isomerase (cyclophilin)-like 3 // 9q31 // 301432 /// ENSRNOT00000018284 // Ppil3 // peptidylprolyl isomerase (cyclophilin)-like 3 // 9q31 // 301432 /// BC087645 // Ppil3 // peptidylprolyl isomerase (cyclophilin)-like 3 // 9q31 // 301432	NM_175707 // RefSeq // Rattus norvegicus peptidylprolyl isomerase (cyclophilin)-like 3 (Ppil3), mRNA. // chr9 // 100 // 100 // 29 // 29 // 0 /// ENSRNOT00000018284 // ENSEMBL // Peptidyl-prolyl cis-trans isomerase-like 3 gene:ENSRNOG00000013636 // chr9 // 100 // 100 // 29 // 29 // 0 /// BC087645 // GenBank // Rattus norvegicus peptidylprolyl isomerase (cyclophilin)-like 3, mRNA (cDNA clone MGC:10…	NM_175707 // GO:0006397 // mRNA processing // inferred from electronic annotation /// NM_175707 // GO:0006457 // protein folding // inferred from electronic annotation /// NM_175707 // GO:0008380 // RNA splicing // inferred from electronic annotation /// ENSRNOT00000018284 // GO:0006397 // mRNA processing // inferred from electronic annotation /// ENSRNOT00000018284 // GO:0006457 // protein foldi…	NM_175707 // GO:0005681 // spliceosomal complex // inferred from electronic annotation /// ENSRNOT00000018284 // GO:0005681 // spliceosomal complex // inferred from electronic annotation /// BC087645 // GO:0005681 // spliceosomal complex // inferred from electronic annotation	NM_175707 // GO:0003755 // peptidyl-prolyl cis-trans isomerase activity // inferred from electronic annotation /// NM_175707 // GO:0005515 // protein binding // not recorded /// NM_175707 // GO:0016853 // isomerase activity // inferred from electronic annotation /// ENSRNOT00000018284 // GO:0003755 // peptidyl-prolyl cis-trans isomerase activity // inferred from electronic annotation /// ENSRNOT0…	---	-1.76664		1.81234		1.60258	1.73136		1.71543			1.68312		2.04349		2.07549	1.93403			2.01767	1.24977
Amd1	adenosylmethionine decarboxylase 1 (Amd1), mRNA.	2.59944	-2.35961		2.59944	-2.35961		NM_031011	---	---	NM_031011 // Amd1 // adenosylmethionine decarboxylase 1 // 20q12 // 81640 /// ENSRNOT00000000715 // Amd1 // adenosylmethionine decarboxylase 1 // 20q12 // 81640 /// BC061532 // Amd1 // adenosylmethionine decarboxylase 1 // 20q12 // 81640 /// ENSRNOT00000067493 // Amd1 // adenosylmethionine decarboxylase 1 // 20q12 // 81640	NM_031011 // RefSeq // Rattus norvegicus adenosylmethionine decarboxylase 1 (Amd1), mRNA. // chr20 // 100 // 96 // 24 // 24 // 0 /// ENSRNOT00000000715 // ENSEMBL // S-adenosylmethionine decarboxylase proenzyme gene:ENSRNOG00000000585 // chr20 // 100 // 100 // 25 // 25 // 0 /// BC061532 // GenBank // Rattus norvegicus adenosylmethionine decarboxylase 1, mRNA (cDNA clone MGC:72695 IMAGE:6921099), …	NM_031011 // GO:0001701 // in utero embryonic development // not recorded /// NM_031011 // GO:0006595 // polyamine metabolic process // inferred from direct assay /// NM_031011 // GO:0006597 // spermine biosynthetic process // inferred from direct assay /// NM_031011 // GO:0006597 // spermine biosynthetic process // inferred from electronic annotation /// NM_031011 // GO:0006597 // spermine biosy…	NM_031011 // GO:0005829 // cytosol // not recorded /// ENSRNOT00000000715 // GO:0005829 // cytosol // not recorded /// BC061532 // GO:0005829 // cytosol // not recorded /// ENSRNOT00000067493 // GO:0005829 // cytosol // not recorded	NM_031011 // GO:0004014 // adenosylmethionine decarboxylase activity // inferred from direct assay /// NM_031011 // GO:0004014 // adenosylmethionine decarboxylase activity // inferred from electronic annotation /// NM_031011 // GO:0004014 // adenosylmethionine decarboxylase activity // not recorded /// NM_031011 // GO:0016829 // lyase activity // inferred from electronic annotation /// ENSRNOT000…	---		-1.57831	-1.78531		-1.6859	-2.16739	-1.77548	-1.79848		-2.15866	-1.91718					-2.03792	-1.71196	-1.69871	-1.8162	-1.82021
Mrps14	mitochondrial ribosomal protein S14 (Mrps14), nuclear gene encoding mitochondrial protein, mRNA.	4.50085	-2.33543		4.50085	-2.33543		NM_001105963	---	---	NM_001105963 // Mrps14 // mitochondrial ribosomal protein S14 // 13q22 // 289143 /// ENSRNOT00000003460 // Mrps14 // mitochondrial ribosomal protein S14 // 13q22 // 289143 /// BC166895 // Mrps14 // mitochondrial ribosomal protein S14 // 13q22 // 289143	NM_001105963 // RefSeq // Rattus norvegicus mitochondrial ribosomal protein S14 (Mrps14), nuclear gene encoding mitochondrial protein, mRNA. // chr13 // 100 // 100 // 25 // 25 // 0 /// ENSRNOT00000003460 // ENSEMBL // Mitochondrial ribosomal protein S14 (Predicted), isoform CRA_b gene:ENSRNOG00000002569 // chr13 // 100 // 100 // 25 // 25 // 0 /// BC166895 // GenBank // Rattus norvegicus mitochond…	NM_001105963 // GO:0006412 // translation // inferred from electronic annotation /// ENSRNOT00000003460 // GO:0006412 // translation // inferred from electronic annotation /// BC166895 // GO:0006412 // translation // inferred from electronic annotation	NM_001105963 // GO:0005622 // intracellular // inferred from electronic annotation /// NM_001105963 // GO:0005739 // mitochondrion // inferred from electronic annotation /// NM_001105963 // GO:0005739 // mitochondrion // not recorded /// NM_001105963 // GO:0005840 // ribosome // inferred from electronic annotation /// ENSRNOT00000003460 // GO:0005622 // intracellular // inferred from electronic a…	NM_001105963 // GO:0003735 // structural constituent of ribosome // inferred from electronic annotation /// NM_001105963 // GO:0005515 // protein binding // inferred from electronic annotation /// NM_001105963 // GO:0005515 // protein binding // not recorded /// ENSRNOT00000003460 // GO:0003735 // structural constituent of ribosome // inferred from electronic annotation /// ENSRNOT00000003460 // …	---
Ei24	etoposide induced 2.4 mRNA (Ei24), mRNA.		-2.33199	-2.3011		-2.33199	-2.3011	NM_001025660	---	---	NM_001025660 // Ei24 // etoposide induced 2.4 mRNA // 8q21 // 300514 /// ENSRNOT00000046590 // Ei24 // etoposide induced 2.4 mRNA // 8q21 // 300514 /// BC098721 // Ei24 // etoposide induced 2.4 mRNA // 8q21 // 300514	NM_001025660 // RefSeq // Rattus norvegicus etoposide induced 2.4 mRNA (Ei24), mRNA. // chr8 // 100 // 100 // 17 // 17 // 0 /// ENSRNOT00000046590 // ENSEMBL // Etoposide-induced protein 2.4 homolog gene:ENSRNOG00000030391 // chr8 // 100 // 88 // 15 // 15 // 0 /// BC098721 // GenBank // Rattus norvegicus etoposide induced 2.4 mRNA, mRNA (cDNA clone MGC:112713 IMAGE:7370909), complete cds. // chr8…	NM_001025660 // GO:0006917 // induction of apoptosis // inferred from electronic annotation /// NM_001025660 // GO:0006917 // induction of apoptosis // not recorded /// NM_001025660 // GO:0030308 // negative regulation of cell growth // inferred from electronic annotation /// NM_001025660 // GO:0030308 // negative regulation of cell growth // not recorded /// NM_001025660 // GO:0042493 // respons…	NM_001025660 // GO:0016020 // membrane // inferred from electronic annotation /// NM_001025660 // GO:0016021 // integral to membrane // inferred from electronic annotation /// ENSRNOT00000046590 // GO:0016020 // membrane // inferred from electronic annotation /// ENSRNOT00000046590 // GO:0016021 // integral to membrane // inferred from electronic annotation /// BC098721 // GO:0016020 // membrane …	---	---					1.69188			1.69188		-1.57379	0.603323					-0.485233			-0.485233	0.059045
Pcbp1	similar to Poly(rC)-binding protein 1 gene:ENSRNOG00000017708	2.03343	-2.32746		2.03343	-2.32746		ENSRNOT00000023806	---	---	ENSRNOT00000023806 // Pcbp1 // poly(rC) binding protein 1 // 4q34 // 500242	ENSRNOT00000023806 // ENSEMBL // poly(rC) binding protein 1-like gene:ENSRNOG00000017708 // chr4 // 100 // 100 // 23 // 23 // 0	---	---	ENSRNOT00000023806 // GO:0003723 // RNA binding // inferred from electronic annotation	---										-1.6441										-1.6441
Decr1	2,4-dienoyl CoA reductase 1, mitochondrial (Decr1), nuclear gene encoding mitochondrial protein, mRNA.	3.0127	-2.31969		3.0127	-2.31969		NM_057197	---	---	NM_057197 // Decr1 // 2,4-dienoyl CoA reductase 1, mitochondrial // 5q13 // 117543 /// ENSRNOT00000011330 // Decr1 // 2,4-dienoyl CoA reductase 1, mitochondrial // 5q13 // 117543 /// BC059120 // Decr1 // 2,4-dienoyl CoA reductase 1, mitochondrial // 5q13 // 117543	NM_057197 // RefSeq // Rattus norvegicus 2,4-dienoyl CoA reductase 1, mitochondrial (Decr1), nuclear gene encoding mitochondrial protein, mRNA. // chr5 // 100 // 100 // 30 // 30 // 0 /// ENSRNOT00000011330 // ENSEMBL // 2,4-dienoyl-CoA reductase, mitochondrial gene:ENSRNOG00000008236 // chr5 // 100 // 100 // 30 // 30 // 0 /// BC059120 // GenBank // Rattus norvegicus 2,4-dienoyl CoA reductase 1, m…	NM_057197 // GO:0006635 // fatty acid beta-oxidation // inferred from electronic annotation /// NM_057197 // GO:0006635 // fatty acid beta-oxidation // not recorded /// NM_057197 // GO:0051289 // protein homotetramerization // inferred from electronic annotation /// NM_057197 // GO:0051289 // protein homotetramerization // not recorded /// NM_057197 // GO:0055114 // oxidation reduction // inferre…	NM_057197 // GO:0005739 // mitochondrion // inferred from electronic annotation /// NM_057197 // GO:0005739 // mitochondrion // not recorded /// ENSRNOT00000011330 // GO:0005739 // mitochondrion // inferred from electronic annotation /// ENSRNOT00000011330 // GO:0005739 // mitochondrion // not recorded /// BC059120 // GO:0005739 // mitochondrion // inferred from electronic annotation /// BC059120…	NM_057197 // GO:0005488 // binding // inferred from electronic annotation /// NM_057197 // GO:0008670 // 2,4-dienoyl-CoA reductase (NADPH) activity // not recorded /// NM_057197 // GO:0008670 // 2,4-dienoyl-CoA reductase (NADPH) activity // traceable author statement /// NM_057197 // GO:0016491 // oxidoreductase activity // inferred from electronic annotation /// NM_057197 // GO:0070402 // NADPH …	BC059120 // GenMAPP // Fatty_Acid_Synthesis /// BC059120 // GenMAPP // Mitochondrial_fatty_acid_betaoxidation	7.79877									-1.71128										3.04375
Tmem218	transmembrane protein 218 (Tmem218), mRNA.	1.90541	-2.31694		1.90541	-2.31694		NM_001008325	---	---	NM_001008325 // Tmem218 // transmembrane protein 218 // 8q21 // 300516 /// ENSRNOT00000012060 // Tmem218 // transmembrane protein 218 // 8q21 // 300516 /// BC085342 // Tmem218 // transmembrane protein 218 // 8q21 // 300516	NM_001008325 // RefSeq // Rattus norvegicus transmembrane protein 218 (Tmem218), mRNA. // chr8 // 100 // 100 // 25 // 25 // 0 /// ENSRNOT00000012060 // ENSEMBL // Transmembrane protein 218 gene:ENSRNOG00000008757 // chr8 // 100 // 100 // 25 // 25 // 0 /// BC085342 // GenBank // Rattus norvegicus transmembrane protein 218, mRNA (cDNA clone MGC:105984 IMAGE:7303171), complete cds. // chr8 // 100 //…	---	NM_001008325 // GO:0016020 // membrane // inferred from electronic annotation /// NM_001008325 // GO:0016021 // integral to membrane // inferred from electronic annotation /// ENSRNOT00000012060 // GO:0016020 // membrane // inferred from electronic annotation /// ENSRNOT00000012060 // GO:0016021 // integral to membrane // inferred from electronic annotation /// BC085342 // GO:0016020 // membrane …	---	---
Gstk1	glutathione S-transferase kappa 1 (Gstk1), mRNA.	3.15909	-2.31675		3.15909	-2.31675		NM_181371	---	---	NM_181371 // Gstk1 // glutathione S-transferase kappa 1 // 4q23 // 297029 /// ENSRNOT00000022275 // Gstk1 // glutathione S-transferase kappa 1 // 4q23 // 297029 /// FJ179400 // Gstk1 // glutathione S-transferase kappa 1 // 4q23 // 297029	NM_181371 // RefSeq // Rattus norvegicus glutathione S-transferase kappa 1 (Gstk1), nuclear gene encoding mitochondrial protein, mRNA. // chr4 // 100 // 100 // 30 // 30 // 0 /// ENSRNOT00000022275 // ENSEMBL // Glutathione S-transferase kappa 1 gene:ENSRNOG00000016484 // chr4 // 100 // 100 // 30 // 30 // 0 /// FJ179400 // GenBank // Rattus norvegicus glutathione S-transferase kappa mRNA, complete…	NM_181371 // GO:0006749 // glutathione metabolic process // inferred from electronic annotation /// NM_181371 // GO:0006749 // glutathione metabolic process // not recorded /// ENSRNOT00000022275 // GO:0006749 // glutathione metabolic process // inferred from electronic annotation /// ENSRNOT00000022275 // GO:0006749 // glutathione metabolic process // not recorded /// FJ179400 // GO:0006749 // g…	NM_181371 // GO:0005622 // intracellular // not recorded /// NM_181371 // GO:0005739 // mitochondrion // inferred from electronic annotation /// NM_181371 // GO:0005739 // mitochondrion // not recorded /// NM_181371 // GO:0005743 // mitochondrial inner membrane // inferred from electronic annotation /// NM_181371 // GO:0005743 // mitochondrial inner membrane // not recorded /// NM_181371 // GO:00…	NM_181371 // GO:0004364 // glutathione transferase activity // inferred from electronic annotation /// NM_181371 // GO:0004364 // glutathione transferase activity // not recorded /// NM_181371 // GO:0004602 // glutathione peroxidase activity // inferred from electronic annotation /// NM_181371 // GO:0004602 // glutathione peroxidase activity // not recorded /// NM_181371 // GO:0005515 // protein …	---
Med21	mediator complex subunit 21 (Med21), mRNA.	4.38267	-2.31217		4.38267	-2.31217		NM_001107895	---	---	NM_001107895 // Med21 // mediator complex subunit 21 // 4q44 // 312849 /// ENSRNOT00000002500 // Med21 // mediator complex subunit 21 // 4q44 // 312849	NM_001107895 // RefSeq // Rattus norvegicus mediator complex subunit 21 (Med21), mRNA. // chr4 // 100 // 72 // 18 // 18 // 0 /// ENSRNOT00000002500 // ENSEMBL // Uncharacterized protein gene:ENSRNOG00000001820 // chr4 // 100 // 88 // 22 // 22 // 0	NM_001107895 // GO:0001824 // blastocyst development // not recorded /// NM_001107895 // GO:0045944 // positive regulation of transcription from RNA polymerase II promoter // not recorded /// ENSRNOT00000002500 // GO:0001824 // blastocyst development // not recorded /// ENSRNOT00000002500 // GO:0045944 // positive regulation of transcription from RNA polymerase II promoter // not recorded	NM_001107895 // GO:0016592 // mediator complex // not recorded /// ENSRNOT00000002500 // GO:0016592 // mediator complex // not recorded	NM_001107895 // GO:0003713 // transcription coactivator activity // not recorded /// NM_001107895 // GO:0005515 // protein binding // not recorded /// ENSRNOT00000002500 // GO:0003713 // transcription coactivator activity // not recorded /// ENSRNOT00000002500 // GO:0005515 // protein binding // not recorded	---										-1.91951			1.65987		2.25977					0.66671
Ndufaf1	NADH dehydrogenase (ubiquinone) 1 alpha subcomplex, assembly factor 1 (Ndufaf1), mRNA.	5.31377	-2.30767	2.30266	5.31377	-2.30767	2.30266	NM_001106500	---	---	NM_001106500 // Ndufaf1 // NADH dehydrogenase (ubiquinone) 1 alpha subcomplex, assembly factor 1 // 3q35 // 296086 /// ENSRNOT00000006874 // Ndufaf1 // NADH dehydrogenase (ubiquinone) 1 alpha subcomplex, assembly factor 1 // 3q35 // 296086	NM_001106500 // RefSeq // Rattus norvegicus NADH dehydrogenase (ubiquinone) 1 alpha subcomplex, assembly factor 1 (Ndufaf1), mRNA. // chr3 // 100 // 100 // 26 // 26 // 0 /// ENSRNOT00000006874 // ENSEMBL // NADH dehydrogenase (ubiquinone) 1 alpha subcomplex, assembly factor 1 gene:ENSRNOG00000005006 // chr3 // 100 // 100 // 26 // 26 // 0	---	NM_001106500 // GO:0005739 // mitochondrion // not recorded /// ENSRNOT00000006874 // GO:0005739 // mitochondrion // not recorded	NM_001106500 // GO:0005515 // protein binding // not recorded /// ENSRNOT00000006874 // GO:0005515 // protein binding // not recorded	---										-1.90961										-1.90961
Pop4	processing of precursor 4, ribonuclease P/MRP subunit (S. cerevisiae) (Pop4), mRNA.	2.07336	-2.30046		2.07336	-2.30046		NM_001009642	---	---	NM_001009642 // Pop4 // processing of precursor 4, ribonuclease P/MRP subunit (S. cerevisiae) // 1q22 // 292831 /// ENSRNOT00000020474 // Pop4 // processing of precursor 4, ribonuclease P/MRP subunit (S. cerevisiae) // 1q22 // 292831 /// BC088183 // Pop4 // processing of precursor 4, ribonuclease P/MRP subunit (S. cerevisiae) // 1q22 // 292831	NM_001009642 // RefSeq // Rattus norvegicus processing of precursor 4, ribonuclease P/MRP subunit (S. cerevisiae) (Pop4), mRNA. // chr1 // 100 // 100 // 32 // 32 // 0 /// ENSRNOT00000020474 // ENSEMBL // Ribonuclease P protein subunit p29 gene:ENSRNOG00000027646 // chr1 // 100 // 100 // 32 // 32 // 0 /// BC088183 // GenBank // Rattus norvegicus processing of precursor 4, ribonuclease P/MRP subuni…	NM_001009642 // GO:0006364 // rRNA processing // inferred from electronic annotation /// NM_001009642 // GO:0006379 // mRNA cleavage // inferred from electronic annotation /// NM_001009642 // GO:0008033 // tRNA processing // inferred from electronic annotation /// ENSRNOT00000020474 // GO:0006364 // rRNA processing // inferred from electronic annotation /// ENSRNOT00000020474 // GO:0006379 // mRN…	NM_001009642 // GO:0000172 // ribonuclease MRP complex // inferred from electronic annotation /// NM_001009642 // GO:0005634 // nucleus // inferred from electronic annotation /// NM_001009642 // GO:0005655 // nucleolar ribonuclease P complex // inferred from electronic annotation /// NM_001009642 // GO:0005730 // nucleolus // inferred from electronic annotation /// NM_001009642 // GO:0030677 // r…	NM_001009642 // GO:0003723 // RNA binding // inferred from electronic annotation /// NM_001009642 // GO:0004526 // ribonuclease P activity // inferred from electronic annotation /// NM_001009642 // GO:0004540 // ribonuclease activity // inferred from electronic annotation /// NM_001009642 // GO:0005515 // protein binding // not recorded /// NM_001009642 // GO:0016787 // hydrolase activity // infe…	---
Dbi	diazepam binding inhibitor (GABA receptor modulator, acyl-Coenzyme A binding protein) (Dbi), mRNA.	3.78156	-2.3		3.78156			NM_031853	---	---	NM_031853 // Dbi // diazepam binding inhibitor (GABA receptor modulator, acyl-Coenzyme A binding protein) // 13q13 // 25045 /// BC084717 // Dbi // diazepam binding inhibitor (GABA receptor modulator, acyl-Coenzyme A binding protein) // 13q13 // 25045	NM_031853 // RefSeq // Rattus norvegicus diazepam binding inhibitor (GABA receptor modulator, acyl-Coenzyme A binding protein) (Dbi), mRNA. // chrUn // 100 // 94 // 16 // 16 // 0 /// BC084717 // GenBank // Rattus norvegicus diazepam binding inhibitor (GABA receptor modulator, acyl-Coenzyme A binding protein), mRNA (cDNA clone MGC:105272 IMAGE:7310272), complete cds. // chrUn // 100 // 71 // 12 //…	NM_031853 // GO:0006637 // acyl-CoA metabolic process // traceable author statement /// NM_031853 // GO:0006694 // steroid biosynthetic process // traceable author statement /// NM_031853 // GO:0006810 // transport // inferred from electronic annotation /// NM_031853 // GO:0007420 // brain development // inferred from expression pattern /// NM_031853 // GO:0014009 // glial cell proliferation // i…	NM_031853 // GO:0005615 // extracellular space // inferred from direct assay /// NM_031853 // GO:0005634 // nucleus // inferred from direct assay /// NM_031853 // GO:0005737 // cytoplasm // inferred from direct assay /// NM_031853 // GO:0005739 // mitochondrion // not recorded /// NM_031853 // GO:0005886 // plasma membrane // inferred from direct assay /// NM_031853 // GO:0043292 // contractile f…	NM_031853 // GO:0000062 // acyl-CoA binding // inferred from physical interaction /// NM_031853 // GO:0005515 // protein binding // inferred from physical interaction /// NM_031853 // GO:0008289 // lipid binding // inferred from electronic annotation /// NM_031853 // GO:0030156 // benzodiazepine receptor binding // inferred from direct assay /// BC084717 // GO:0000062 // acyl-CoA binding // infer…	---
Lsm5	LSM5 homolog, U6 small nuclear RNA associated (S. cerevisiae) (Lsm5), mRNA.	5.16331	-2.3		5.16331			NM_001107289	---	---	NM_001107289 // Lsm5 // LSM5 homolog, U6 small nuclear RNA associated (S. cerevisiae) // 4q24 // 306222 /// ENSRNOT00000065625 // Lsm5 // LSM5 homolog, U6 small nuclear RNA associated (S. cerevisiae) // 4q24 // 306222	NM_001107289 // RefSeq // Rattus norvegicus LSM5 homolog, U6 small nuclear RNA associated (S. cerevisiae) (Lsm5), mRNA. // chr4 // 100 // 100 // 13 // 13 // 0 /// ENSRNOT00000065625 // ENSEMBL // Uncharacterized protein gene:ENSRNOG00000042126 // chr4 // 100 // 100 // 13 // 13 // 0	---	---	NM_001107289 // GO:0005515 // protein binding // not recorded /// ENSRNOT00000065625 // GO:0005515 // protein binding // not recorded	---	5.32232														1.9253					3.62381
Sf3b5	splicing factor 3b, subunit 5 (Sf3b5), mRNA.	3.39926	-2.3		3.39926			NM_001126092	---	---	NM_001126092 // Sf3b5 // splicing factor 3b, subunit 5 // 1p13 // 680891 /// ENSRNOT00000019994 // Sf3b5 // splicing factor 3b, subunit 5 // 1p13 // 680891	NM_001126092 // RefSeq // Rattus norvegicus splicing factor 3b, subunit 5 (Sf3b5), mRNA. // chr1 // 100 // 100 // 25 // 25 // 0 /// ENSRNOT00000019994 // ENSEMBL // Uncharacterized protein gene:ENSRNOG00000014908 // chr1 // 100 // 100 // 25 // 25 // 0	NM_001126092 // GO:0008380 // RNA splicing // not recorded /// ENSRNOT00000019994 // GO:0008380 // RNA splicing // not recorded	NM_001126092 // GO:0005634 // nucleus // not recorded /// ENSRNOT00000019994 // GO:0005634 // nucleus // not recorded	---	---
Cdyl2	cyclin-dependent kinase 4 (Cdk4), mRNA.	1.6	-2.29849			-2.29849		NM_053593	---	---	NM_053593 // Cdk4 // cyclin-dependent kinase 4 // 7q22 // 94201 /// ENSRNOT00000031796 // Cdk4 // cyclin-dependent kinase 4 // 7q22 // 94201 /// L11007 // Cdk4 // cyclin-dependent kinase 4 // 7q22 // 94201	NM_053593 // RefSeq // Rattus norvegicus cyclin-dependent kinase 4 (Cdk4), mRNA. // chr7 // 100 // 100 // 36 // 36 // 0 /// ENSRNOT00000031796 // ENSEMBL // Cell division protein kinase 4 gene:ENSRNOG00000025602 // chr7 // 100 // 100 // 36 // 36 // 0 /// L11007 // GenBank // Rattus norvegicus cyclin-dependent kinase 4 (cdk4) mRNA, complete cds. // chr7 // 100 // 100 // 36 // 36 // 0	NM_053593 // GO:0000082 // G1/S transition of mitotic cell cycle // inferred from electronic annotation /// NM_053593 // GO:0000082 // G1/S transition of mitotic cell cycle // not recorded /// NM_053593 // GO:0006468 // protein phosphorylation // inferred from electronic annotation /// NM_053593 // GO:0006468 // protein phosphorylation // not recorded /// NM_053593 // GO:0007165 // signal transdu…	NM_053593 // GO:0000307 // cyclin-dependent protein kinase holoenzyme complex // inferred from electronic annotation /// NM_053593 // GO:0000307 // cyclin-dependent protein kinase holoenzyme complex // not recorded /// NM_053593 // GO:0005634 // nucleus // inferred from direct assay /// NM_053593 // GO:0005634 // nucleus // not recorded /// NM_053593 // GO:0005654 // nucleoplasm // not recorded /…	NM_053593 // GO:0000166 // nucleotide binding // inferred from electronic annotation /// NM_053593 // GO:0004672 // protein kinase activity // not recorded /// NM_053593 // GO:0004693 // cyclin-dependent protein kinase activity // inferred from direct assay /// NM_053593 // GO:0004693 // cyclin-dependent protein kinase activity // not recorded /// NM_053593 // GO:0005515 // protein binding // inf…	L11007 // GenMAPP // Cell_cycle_KEGG /// L11007 // GenMAPP // G1_to_S_cell_cycle_Reactome
Sqrdl	sulfide quinone reductase-like (yeast) (Sqrdl), nuclear gene encoding mitochondrial protein, mRNA.	2.60401	-2.29304		2.60401	-2.29304		NM_001047913	---	---	NM_001047913 // Sqrdl // sulfide quinone reductase-like (yeast) // 3q35 // 691966 /// BC158559 // Sqrdl // sulfide quinone reductase-like (yeast) // 3q35 // 691966	NM_001047913 // RefSeq // Rattus norvegicus sulfide quinone reductase-like (yeast) (Sqrdl), nuclear gene encoding mitochondrial protein, mRNA. // chr3_random // 100 // 53 // 16 // 16 // 0 /// BC158559 // GenBank // Rattus norvegicus sulfide quinone reductase-like (yeast), mRNA (cDNA clone MGC:187237 IMAGE:7456444), complete cds. // chr3_random // 100 // 53 // 16 // 16 // 0	NM_001047913 // GO:0055114 // oxidation reduction // inferred from electronic annotation /// BC158559 // GO:0055114 // oxidation reduction // inferred from electronic annotation	---	NM_001047913 // GO:0016491 // oxidoreductase activity // inferred from electronic annotation /// BC158559 // GO:0016491 // oxidoreductase activity // inferred from electronic annotation	---						-1.5285		-1.5285			-1.5285					-1.5285			-1.5285	-1.5285
Mcee	methylmalonyl CoA epimerase (Mcee), mRNA.	4.66729	-2.28387	2.04359	4.66729	-2.28387	2.04359	NM_001106341	---	---	NM_001106341 // Mcee // methylmalonyl CoA epimerase // 1q22 // 293829 /// ENSRNOT00000021884 // Mcee // methylmalonyl CoA epimerase // 1q22 // 293829	NM_001106341 // RefSeq // Rattus norvegicus methylmalonyl CoA epimerase (Mcee), mRNA. // chr1 // 100 // 100 // 25 // 25 // 0 /// ENSRNOT00000021884 // ENSEMBL // Uncharacterized protein gene:ENSRNOG00000016327 // chr1 // 100 // 100 // 25 // 25 // 0	NM_001106341 // GO:0046491 // L-methylmalonyl-CoA metabolic process // not recorded /// ENSRNOT00000021884 // GO:0046491 // L-methylmalonyl-CoA metabolic process // not recorded	NM_001106341 // GO:0005739 // mitochondrion // not recorded /// ENSRNOT00000021884 // GO:0005739 // mitochondrion // not recorded	NM_001106341 // GO:0004493 // methylmalonyl-CoA epimerase activity // not recorded /// ENSRNOT00000021884 // GO:0004493 // methylmalonyl-CoA epimerase activity // not recorded	---
Peci	peroxisomal D3,D2-enoyl-CoA isomerase (Peci), mRNA.	5.15989	-2.28101	2.26211	5.15989	-2.28101	2.26211	NM_001006966	---	---	NM_001006966 // Peci // peroxisomal D3,D2-enoyl-CoA isomerase // 17p12 // 291075 /// ENSRNOT00000022022 // Peci // peroxisomal D3,D2-enoyl-CoA isomerase // 17p12 // 291075 /// BC083764 // Peci // peroxisomal D3,D2-enoyl-CoA isomerase // 17p12 // 291075	NM_001006966 // RefSeq // Rattus norvegicus peroxisomal D3,D2-enoyl-CoA isomerase (Peci), mRNA. // chr17 // 100 // 100 // 25 // 25 // 0 /// ENSRNOT00000022022 // ENSEMBL // Peroxisomal 3,2-trans-enoyl-CoA isomerase gene:ENSRNOG00000016369 // chr17 // 100 // 100 // 25 // 25 // 0 /// BC083764 // GenBank // Rattus norvegicus peroxisomal D3,D2-enoyl-CoA isomerase, mRNA (cDNA clone MGC:94706 IMAGE:719…	NM_001006966 // GO:0006635 // fatty acid beta-oxidation // inferred from direct assay /// ENSRNOT00000022022 // GO:0006635 // fatty acid beta-oxidation // inferred from direct assay /// BC083764 // GO:0006635 // fatty acid beta-oxidation // inferred from direct assay	NM_001006966 // GO:0005739 // mitochondrion // inferred from direct assay /// NM_001006966 // GO:0005739 // mitochondrion // not recorded /// NM_001006966 // GO:0005777 // peroxisome // inferred from direct assay /// NM_001006966 // GO:0005777 // peroxisome // not recorded /// NM_001006966 // GO:0005782 // peroxisomal matrix // inferred from electronic annotation /// NM_001006966 // GO:0043231 //…	NM_001006966 // GO:0000062 // acyl-CoA binding // inferred from electronic annotation /// NM_001006966 // GO:0004165 // dodecenoyl-CoA delta-isomerase activity // inferred from electronic annotation /// NM_001006966 // GO:0005488 // binding // inferred from electronic annotation /// NM_001006966 // GO:0016853 // isomerase activity // inferred from electronic annotation /// NM_001006966 // GO:0016…	---	3.90936																			3.90936
Fxyd1	FXYD domain-containing ion transport regulator 1 (Fxyd1), mRNA.	2.28355	-2.27965		2.28355	-2.27965		NM_031648	---	---	NM_031648 // Fxyd1 // FXYD domain-containing ion transport regulator 1 // 1q21 // 58971 /// ENSRNOT00000028624 // Fxyd1 // FXYD domain-containing ion transport regulator 1 // 1q21 // 58971 /// U72246 // Fxyd1 // FXYD domain-containing ion transport regulator 1 // 1q21 // 58971	NM_031648 // RefSeq // Rattus norvegicus FXYD domain-containing ion transport regulator 1 (Fxyd1), mRNA. // chr1 // 92 // 86 // 22 // 24 // 0 /// ENSRNOT00000028624 // ENSEMBL // Phospholemman gene:ENSRNOG00000021079 // chr1 // 100 // 100 // 28 // 28 // 0 /// U72246 // GenBank // Rattus norvegicus phospholemman chloride channel mRNA, complete cds. // chr1 // 92 // 86 // 22 // 24 // 0	NM_031648 // GO:0006811 // ion transport // inferred from electronic annotation /// NM_031648 // GO:0006874 // cellular calcium ion homeostasis // inferred from direct assay /// NM_031648 // GO:0006936 // muscle contraction // inferred from direct assay /// ENSRNOT00000028624 // GO:0006811 // ion transport // inferred from electronic annotation /// ENSRNOT00000028624 // GO:0006874 // cellular cal…	NM_031648 // GO:0016020 // membrane // inferred from electronic annotation /// NM_031648 // GO:0016021 // integral to membrane // traceable author statement /// NM_031648 // GO:0034707 // chloride channel complex // inferred from electronic annotation /// ENSRNOT00000028624 // GO:0016020 // membrane // inferred from electronic annotation /// ENSRNOT00000028624 // GO:0016021 // integral to membran…	NM_031648 // GO:0005216 // ion channel activity // inferred from electronic annotation /// NM_031648 // GO:0005254 // chloride channel activity // inferred from electronic annotation /// NM_031648 // GO:0005515 // protein binding // inferred from physical interaction /// ENSRNOT00000028624 // GO:0005216 // ion channel activity // inferred from electronic annotation /// ENSRNOT00000028624 // GO:00…	---
Higd2a	HIG1 hypoxia inducible domain family, member 2A (Higd2a), mRNA.	2.99322	-2.27938		2.06935	-2.27938		NM_001106102	---	---	NM_001106102 // Higd2a // HIG1 hypoxia inducible domain family, member 2A // 17p14 // 290999 /// ENSRNOT00000023515 // Higd2a // HIG1 hypoxia inducible domain family, member 2A // 17p14 // 290999 /// BC166544 // Higd2a // HIG1 hypoxia inducible domain family, member 2A // 17p14 // 290999	NM_001106102 // RefSeq // Rattus norvegicus HIG1 hypoxia inducible domain family, member 2A (Higd2a), mRNA. // chr17 // 100 // 100 // 8 // 8 // 0 /// ENSRNOT00000023515 // ENSEMBL // RCG24095, isoform CRA_d gene:ENSRNOG00000017372 // chr17 // 100 // 100 // 8 // 8 // 0 /// BC166544 // GenBank // Rattus norvegicus HIG1 domain family, member 2A, mRNA (cDNA clone MGC:188144 IMAGE:7301761), complete c…	---	NM_001106102 // GO:0016020 // membrane // inferred from electronic annotation /// NM_001106102 // GO:0016021 // integral to membrane // inferred from electronic annotation /// ENSRNOT00000023515 // GO:0016020 // membrane // inferred from electronic annotation /// ENSRNOT00000023515 // GO:0016021 // integral to membrane // inferred from electronic annotation /// BC166544 // GO:0016020 // membrane …	---	---
Mrps18a	mitochondrial ribosomal protein S18A (Mrps18a), nuclear gene encoding mitochondrial protein, mRNA.	1.97633	-2.27913		1.97633	-2.27913		NM_198756	---	---	NM_198756 // Mrps18a // mitochondrial ribosomal protein S18A // 9q12 // 301249 /// ENSRNOT00000026499 // Mrps18a // mitochondrial ribosomal protein S18A // 9q12 // 301249 /// BC058507 // Mrps18a // mitochondrial ribosomal protein S18A // 9q12 // 301249	NM_198756 // RefSeq // Rattus norvegicus mitochondrial ribosomal protein S18A (Mrps18a), nuclear gene encoding mitochondrial protein, mRNA. // chr9 // 100 // 100 // 27 // 27 // 0 /// ENSRNOT00000026499 // ENSEMBL // Mitochondrial ribosomal protein S18A, isoform CRA_d gene:ENSRNOG00000019511 // chr9 // 100 // 100 // 27 // 27 // 0 /// BC058507 // GenBank // Rattus norvegicus mitochondrial ribosomal…	NM_198756 // GO:0006412 // translation // inferred from electronic annotation /// ENSRNOT00000026499 // GO:0006412 // translation // inferred from electronic annotation /// BC058507 // GO:0006412 // translation // inferred from electronic annotation	NM_198756 // GO:0005622 // intracellular // inferred from electronic annotation /// NM_198756 // GO:0005739 // mitochondrion // inferred from electronic annotation /// NM_198756 // GO:0005739 // mitochondrion // not recorded /// NM_198756 // GO:0005763 // mitochondrial small ribosomal subunit // not recorded /// NM_198756 // GO:0005840 // ribosome // inferred from electronic annotation /// ENSRNO…	NM_198756 // GO:0003735 // structural constituent of ribosome // inferred from electronic annotation /// ENSRNOT00000026499 // GO:0003735 // structural constituent of ribosome // inferred from electronic annotation /// BC058507 // GO:0003735 // structural constituent of ribosome // inferred from electronic annotation	---	1.99977														-1.55254					0.223615
Cpt2	carnitine palmitoyltransferase 2 (Cpt2), nuclear gene encoding mitochondrial protein, mRNA.	3.21986	-2.27311		3.21986	-2.27311		NM_012930	---	---	NM_012930 // Cpt2 // carnitine palmitoyltransferase 2 // 5q35 // 25413 /// ENSRNOT00000016954 // Cpt2 // carnitine palmitoyltransferase 2 // 5q35 // 25413 /// J05470 // Cpt2 // carnitine palmitoyltransferase 2 // 5q35 // 25413 /// U88295 // Cpt2 // carnitine palmitoyltransferase 2 // 5q35 // 25413 /// ENSRNOT00000067512 // Cpt2 // carnitine palmitoyltransferase 2 // 5q35 // 25413 /// ENSRNOT00000…	NM_012930 // RefSeq // Rattus norvegicus carnitine palmitoyltransferase 2 (Cpt2), nuclear gene encoding mitochondrial protein, mRNA. // chr5 // 100 // 100 // 25 // 25 // 0 /// ENSRNOT00000016954 // ENSEMBL // Carnitine O-palmitoyltransferase 2, mitochondrial gene:ENSRNOG00000012443 // chr5 // 100 // 100 // 25 // 25 // 0 /// J05470 // GenBank // Rat mitochondrial carnitine palmitoyltransferase II …	NM_012930 // GO:0006629 // lipid metabolic process // inferred from electronic annotation /// NM_012930 // GO:0006631 // fatty acid metabolic process // inferred from electronic annotation /// NM_012930 // GO:0006635 // fatty acid beta-oxidation // traceable author statement /// NM_012930 // GO:0006810 // transport // inferred from electronic annotation /// NM_012930 // GO:0006853 // carnitine sh…	NM_012930 // GO:0005739 // mitochondrion // inferred from direct assay /// NM_012930 // GO:0005739 // mitochondrion // not recorded /// NM_012930 // GO:0005743 // mitochondrial inner membrane // inferred from electronic annotation /// NM_012930 // GO:0005743 // mitochondrial inner membrane // not recorded /// NM_012930 // GO:0016020 // membrane // inferred from electronic annotation /// ENSRNOT00…	NM_012930 // GO:0004095 // carnitine O-palmitoyltransferase activity // inferred from direct assay /// NM_012930 // GO:0004095 // carnitine O-palmitoyltransferase activity // inferred from mutant phenotype /// NM_012930 // GO:0004095 // carnitine O-palmitoyltransferase activity // not recorded /// NM_012930 // GO:0008415 // acyltransferase activity // inferred from electronic annotation /// NM_01…	J05470 // GenMAPP // Fatty_Acid_Degradation /// J05470 // GenMAPP // Mitochondrial_fatty_acid_betaoxidation /// U88295 // GenMAPP // Fatty_Acid_Degradation /// U88295 // GenMAPP // Mitochondrial_fatty_acid_betaoxidation	2.56005	1.74601		1.76988	1.56494			1.69361			1.62927					1.62927			1.62927	1.91022
Slc25a11	solute carrier family 25 (mitochondrial carrier; oxoglutarate carrier), member 11 (Slc25a11), nuclear gene encoding mitochondrial protein, mRNA.	3.44581	-2.26329		3.44581	-2.26329		NM_022398	---	---	NM_022398 // Slc25a11 // solute carrier family 25 (mitochondrial carrier; oxoglutarate carrier), member 11 // 10q24 // 64201 /// ENSRNOT00000005144 // Slc25a11 // solute carrier family 25 (mitochondrial carrier; oxoglutarate carrier), member 11 // 10q24 // 64201 /// U84727 // Slc25a11 // solute carrier family 25 (mitochondrial carrier; oxoglutarate carrier), member 11 // 10q24 // 64201	NM_022398 // RefSeq // Rattus norvegicus solute carrier family 25 (mitochondrial carrier; oxoglutarate carrier), member 11 (Slc25a11), nuclear gene encoding mitochondrial protein, mRNA. // chr10 // 79 // 88 // 22 // 28 // 0 /// ENSRNOT00000005144 // ENSEMBL // Mitochondrial 2-oxoglutarate/malate carrier protein gene:ENSRNOG00000003815 // chr10 // 100 // 100 // 32 // 32 // 0 /// U84727 // GenBank …	NM_022398 // GO:0055085 // transmembrane transport // inferred from electronic annotation /// ENSRNOT00000005144 // GO:0055085 // transmembrane transport // inferred from electronic annotation /// U84727 // GO:0055085 // transmembrane transport // inferred from electronic annotation	NM_022398 // GO:0005739 // mitochondrion // inferred from mutant phenotype /// NM_022398 // GO:0005739 // mitochondrion // not recorded /// NM_022398 // GO:0005743 // mitochondrial inner membrane // inferred from electronic annotation /// NM_022398 // GO:0005743 // mitochondrial inner membrane // not recorded /// NM_022398 // GO:0016020 // membrane // inferred from electronic annotation /// NM_02…	NM_022398 // GO:0005215 // transporter activity // inferred from mutant phenotype /// NM_022398 // GO:0005488 // binding // inferred from electronic annotation /// ENSRNOT00000005144 // GO:0005215 // transporter activity // inferred from mutant phenotype /// ENSRNOT00000005144 // GO:0005488 // binding // inferred from electronic annotation /// U84727 // GO:0005215 // transporter activity // infer…	---	9.39195	1.51744						1.51744			1.51744		1.62885		1.51475	1.55368			1.56576	3.51325
Acn9	ACN9 homolog (S. cerevisiae) (Acn9), mRNA.	3.90411	-2.26112		3.90411	-2.26112		NM_001047914	---	---	NM_001047914 // Acn9 // ACN9 homolog (S. cerevisiae) // 4q21 // 362323 /// ENSRNOT00000050827 // Acn9 // ACN9 homolog (S. cerevisiae) // 4q21 // 362323 /// ENSRNOT00000015286 // Acn9 // ACN9 homolog (S. cerevisiae) // 4q21 // 362323	NM_001047914 // RefSeq // Rattus norvegicus ACN9 homolog (S. cerevisiae) (Acn9), mRNA. // chr4 // 100 // 63 // 20 // 20 // 0 /// ENSRNOT00000050827 // ENSEMBL // Isoform 2 of Protein ACN9 homolog, mitochondrial gene:ENSRNOG00000011283 // chr4 // 100 // 63 // 20 // 20 // 0 /// ENSRNOT00000015286 // ENSEMBL // Isoform 1 of Protein ACN9 homolog, mitochondrial gene:ENSRNOG00000011283 // chr4 // 100 /…	---	NM_001047914 // GO:0005739 // mitochondrion // inferred from electronic annotation /// NM_001047914 // GO:0005758 // mitochondrial intermembrane space // inferred from sequence or structural similarity /// ENSRNOT00000050827 // GO:0005739 // mitochondrion // inferred from electronic annotation /// ENSRNOT00000050827 // GO:0005758 // mitochondrial intermembrane space // inferred from sequence or s…	---	---
Tmem70	transmembrane protein 70 (Tmem70), mRNA.	2.42422	-2.25592		2.42422	-2.25592		NM_001109258	---	---	NM_001109258 // Tmem70 // transmembrane protein 70 // 5q11 // 500384 /// ENSRNOT00000008680 // Tmem70 // transmembrane protein 70 // 5q11 // 500384	NM_001109258 // RefSeq // Rattus norvegicus transmembrane protein 70 (Tmem70), nuclear gene encoding mitochondrial protein, mRNA. // chr5 // 100 // 100 // 27 // 27 // 0 /// ENSRNOT00000008680 // ENSEMBL // Uncharacterized protein gene:ENSRNOG00000006608 // chr5 // 100 // 100 // 27 // 27 // 0	NM_001109258 // GO:0033615 // mitochondrial proton-transporting ATP synthase complex assembly // not recorded /// ENSRNOT00000008680 // GO:0033615 // mitochondrial proton-transporting ATP synthase complex assembly // not recorded	NM_001109258 // GO:0005739 // mitochondrion // not recorded /// NM_001109258 // GO:0032592 // integral to mitochondrial membrane // not recorded /// ENSRNOT00000008680 // GO:0005739 // mitochondrion // not recorded /// ENSRNOT00000008680 // GO:0032592 // integral to mitochondrial membrane // not recorded	---	---						-1.55948		-1.55948			-1.55948					-1.55948	-1.56417	-1.51261	-1.54542	-1.54542
Car14	carbonic anhydrase 14 (Car14), mRNA.	2.74233	-2.25029		2.74233	-2.25029		NM_001109655	---	---	NM_001109655 // Car14 // carbonic anhydrase 14 // --- // 791259 /// ENSRNOT00000025523 // Car14 // carbonic anhydrase 14 // --- // 791259 /// EF187253 // Car14 // carbonic anhydrase 14 // --- // 791259	NM_001109655 // RefSeq // Rattus norvegicus carbonic anhydrase 14 (Car14), mRNA. // chr2 // 100 // 80 // 24 // 24 // 0 /// ENSRNOT00000025523 // ENSEMBL // RCG52058, isoform CRA_b gene:ENSRNOG00000023162 // chr2 // 100 // 80 // 24 // 24 // 0 /// EF187253 // GenBank // Rattus norvegicus membrane-bound carbonic anhydrase 14 mRNA, complete cds. // chr2 // 100 // 80 // 24 // 24 // 0	---	---	---	---
Atp6v1d	ATPase, H+ transporting, lysosomal V1 subunit D (Atp6v1d), mRNA.	3.52449	-2.2451		3.52449	-2.2451		NM_199386	---	---	NM_199386 // Atp6v1d // ATPase, H+ transporting, lysosomal V1 subunit D // 6q24 // 299159 /// ENSRNOT00000012101 // Atp6v1d // ATPase, H+ transporting, lysosomal V1 subunit D // 6q24 // 299159 /// BC063177 // Atp6v1d // ATPase, H+ transporting, lysosomal V1 subunit D // 6q24 // 299159	NM_199386 // RefSeq // Rattus norvegicus ATPase, H+ transporting, lysosomal V1 subunit D (Atp6v1d), mRNA. // chr6 // 100 // 100 // 27 // 27 // 0 /// ENSRNOT00000012101 // ENSEMBL // ATPase, H+ transporting, lysosomal V1 subunit D gene:ENSRNOG00000009080 // chr6 // 100 // 100 // 27 // 27 // 0 /// BC063177 // GenBank // Rattus norvegicus ATPase, H+ transporting, lysosomal V1 subunit D, mRNA (cDNA c…	NM_199386 // GO:0015986 // ATP synthesis coupled proton transport // inferred from electronic annotation /// ENSRNOT00000012101 // GO:0015986 // ATP synthesis coupled proton transport // inferred from electronic annotation /// BC063177 // GO:0015986 // ATP synthesis coupled proton transport // inferred from electronic annotation	NM_199386 // GO:0016020 // membrane // inferred from electronic annotation /// NM_199386 // GO:0016020 // membrane // not recorded /// NM_199386 // GO:0016471 // vacuolar proton-transporting V-type ATPase complex // inferred from electronic annotation /// NM_199386 // GO:0016471 // vacuolar proton-transporting V-type ATPase complex // not recorded /// NM_199386 // GO:0033178 // proton-transportin…	NM_199386 // GO:0005515 // protein binding // inferred from electronic annotation /// NM_199386 // GO:0005515 // protein binding // not recorded /// NM_199386 // GO:0042626 // ATPase activity, coupled to transmembrane movement of substances // inferred from electronic annotation /// NM_199386 // GO:0046961 // proton-transporting ATPase activity, rotational mechanism // inferred from electronic an…	---	2.81132												1.51015		1.63708					1.98618
Gtf2a2	general transcription factor IIA, 2 (Gtf2a2), mRNA.	2.14442	-2.22708		2.14442	-2.22708		NM_053345	---	---	NM_053345 // Gtf2a2 // general transcription factor IIA, 2 // 8q24 // 83828 /// BC168727 // Gtf2a2 // general transcription factor IIA, 2 // 8q24 // 83828 /// ENSRNOT00000066459 // Gtf2a2 // general transcription factor IIA, 2 // 8q24 // 83828	NM_053345 // RefSeq // Rattus norvegicus general transcription factor IIA, 2 (Gtf2a2), mRNA. // chr8 // 100 // 30 // 3 // 3 // 0 /// BC168727 // GenBank // Rattus norvegicus general transcription factor IIA, 2, mRNA (cDNA clone MGC:188808 IMAGE:6888477), complete cds. // chr8 // 100 // 40 // 4 // 4 // 0 /// ENSRNOT00000066459 // ENSEMBL // Gtf2a2 protein gene:ENSRNOG00000011062 // chr8 // 100 // …	NM_053345 // GO:0006367 // transcription initiation from RNA polymerase II promoter // inferred from electronic annotation /// NM_053345 // GO:0006367 // transcription initiation from RNA polymerase II promoter // not recorded /// NM_053345 // GO:0006368 // RNA elongation from RNA polymerase II promoter // not recorded /// NM_053345 // GO:0010552 // positive regulation of gene-specific transcript…	NM_053345 // GO:0005634 // nucleus // inferred from electronic annotation /// NM_053345 // GO:0005654 // nucleoplasm // not recorded /// NM_053345 // GO:0005672 // transcription factor TFIIA complex // inferred from electronic annotation /// NM_053345 // GO:0005672 // transcription factor TFIIA complex // not recorded /// BC168727 // GO:0005634 // nucleus // inferred from electronic annotation //…	NM_053345 // GO:0003702 // RNA polymerase II transcription factor activity // inferred from electronic annotation /// NM_053345 // GO:0003702 // RNA polymerase II transcription factor activity // not recorded /// NM_053345 // GO:0003713 // transcription coactivator activity // inferred from electronic annotation /// NM_053345 // GO:0003713 // transcription coactivator activity // not recorded ///…	---
Pabpc4	poly A binding protein, cytoplasmic 4 (Pabpc4), mRNA.	2.36349	-2.22679	1.71405	2.49331	-2.22679		NM_001100538	---	---	NM_001100538 // Pabpc4 // poly(A) binding protein, cytoplasmic 4 // 5q36 // 298510 /// BC166452 // Pabpc4 // poly(A) binding protein, cytoplasmic 4 // 5q36 // 298510 /// ENSRNOT00000056592 // Pabpc4 // poly(A) binding protein, cytoplasmic 4 // 5q36 // 298510 /// ENSRNOT00000021032 // Pabpc4 // poly(A) binding protein, cytoplasmic 4 // 5q36 // 298510	NM_001100538 // RefSeq // Rattus norvegicus poly(A) binding protein, cytoplasmic 4 (Pabpc4), mRNA. // chr5 // 100 // 95 // 37 // 37 // 0 /// BC166452 // GenBank // Rattus norvegicus poly A binding protein, cytoplasmic 4, mRNA (cDNA clone MGC:187687 IMAGE:8372968), complete cds. // chr5 // 100 // 95 // 37 // 37 // 0 /// ENSRNOT00000056592 // ENSEMBL // Pabpc4 protein gene:ENSRNOG00000015642 // chr…	---	NM_001100538 // GO:0005737 // cytoplasm // not recorded /// NM_001100538 // GO:0030529 // ribonucleoprotein complex // not recorded /// BC166452 // GO:0005737 // cytoplasm // not recorded /// BC166452 // GO:0030529 // ribonucleoprotein complex // not recorded /// ENSRNOT00000056592 // GO:0005737 // cytoplasm // not recorded /// ENSRNOT00000056592 // GO:0030529 // ribonucleoprotein complex // not …	NM_001100538 // GO:0000166 // nucleotide binding // inferred from electronic annotation /// NM_001100538 // GO:0003723 // RNA binding // inferred from electronic annotation /// NM_001100538 // GO:0005515 // protein binding // not recorded /// NM_001100538 // GO:0008143 // poly(A) RNA binding // not recorded /// NM_001100538 // GO:0008266 // poly(U) RNA binding // not recorded /// NM_001100538 // …	---										-1.5284										-1.5284
Glrx3	glutaredoxin 3 (Glrx3), mRNA.	3.3909	-2.22575		3.3909	-2.22575		NM_032614	---	---	NM_032614 // Glrx3 // glutaredoxin 3 // 1q41 // 58815 /// ENSRNOT00000022406 // Glrx3 // glutaredoxin 3 // 1q41 // 58815 /// BC086381 // Glrx3 // glutaredoxin 3 // 1q41 // 58815	NM_032614 // RefSeq // Rattus norvegicus glutaredoxin 3 (Glrx3), mRNA. // chr1 // 100 // 100 // 34 // 34 // 0 /// ENSRNOT00000022406 // ENSEMBL // Isoform 1 of Glutaredoxin-3 gene:ENSRNOG00000016227 // chr1 // 100 // 100 // 34 // 34 // 0 /// BC086381 // GenBank // Rattus norvegicus glutaredoxin 3, mRNA (cDNA clone MGC:105380 IMAGE:7301390), complete cds. // chr1 // 100 // 100 // 34 // 34 // 0	NM_032614 // GO:0002026 // regulation of the force of heart contraction // inferred from electronic annotation /// NM_032614 // GO:0002026 // regulation of the force of heart contraction // not recorded /// NM_032614 // GO:0010614 // negative regulation of cardiac muscle hypertrophy // inferred from electronic annotation /// NM_032614 // GO:0010614 // negative regulation of cardiac muscle hypertr…	NM_032614 // GO:0005737 // cytoplasm // inferred from electronic annotation /// NM_032614 // GO:0005938 // cell cortex // inferred from electronic annotation /// NM_032614 // GO:0030018 // Z disc // inferred from electronic annotation /// NM_032614 // GO:0030018 // Z disc // not recorded /// ENSRNOT00000022406 // GO:0005737 // cytoplasm // inferred from electronic annotation /// ENSRNOT0000002240…	NM_032614 // GO:0005080 // protein kinase C binding // inferred from direct assay /// NM_032614 // GO:0005515 // protein binding // inferred from electronic annotation /// NM_032614 // GO:0005515 // protein binding // not recorded /// NM_032614 // GO:0009055 // electron carrier activity // inferred from electronic annotation /// NM_032614 // GO:0015035 // protein disulfide oxidoreductase activity…	---
Nsmce1	non-SMC element 1 homolog (S. cerevisiae) (Nsmce1), mRNA.	2.78547	-2.22415		2.78547	-2.22415		NM_001039611	---	---	NM_001039611 // Nsmce1 // non-SMC element 1 homolog (S. cerevisiae) // 1q36 // 361645 /// BC099757 // Nsmce1 // non-SMC element 1 homolog (S. cerevisiae) // 1q36 // 361645 /// ENSRNOT00000055034 // Nsmce1 // non-SMC element 1 homolog (S. cerevisiae) // 1q36 // 361645 /// ENSRNOT00000020684 // Nsmce1 // non-SMC element 1 homolog (S. cerevisiae) // 1q36 // 361645	NM_001039611 // RefSeq // Rattus norvegicus non-SMC element 1 homolog (S. cerevisiae) (Nsmce1), mRNA. // chr1 // 100 // 100 // 28 // 28 // 0 /// BC099757 // GenBank // Rattus norvegicus non-SMC element 1 homolog (S. cerevisiae), mRNA (cDNA clone MGC:124662 IMAGE:5623851), complete cds. // chr1 // 100 // 100 // 28 // 28 // 0 /// ENSRNOT00000055034 // ENSEMBL // non-structural maintenance of chromo…	NM_001039611 // GO:0006281 // DNA repair // inferred from electronic annotation /// NM_001039611 // GO:0006310 // DNA recombination // inferred from electronic annotation /// NM_001039611 // GO:0023034 // intracellular signaling pathway // inferred from electronic annotation /// BC099757 // GO:0006281 // DNA repair // inferred from electronic annotation /// BC099757 // GO:0006310 // DNA recombina…	NM_001039611 // GO:0005634 // nucleus // inferred from electronic annotation /// BC099757 // GO:0005634 // nucleus // inferred from electronic annotation /// ENSRNOT00000055034 // GO:0005634 // nucleus // inferred from electronic annotation /// ENSRNOT00000020684 // GO:0005634 // nucleus // inferred from electronic annotation	NM_001039611 // GO:0005515 // protein binding // inferred from electronic annotation /// NM_001039611 // GO:0008270 // zinc ion binding // inferred from electronic annotation /// NM_001039611 // GO:0046872 // metal ion binding // inferred from electronic annotation /// BC099757 // GO:0005515 // protein binding // inferred from electronic annotation /// BC099757 // GO:0008270 // zinc ion binding /…	---
Ndufa3	similar to NADH-ubiquinone oxidoreductase B9 subunit gene:ENSRNOG00000014224	4.40445	-2.22016		4.40445	-2.22016		ENSRNOT00000019141	---	---	ENSRNOT00000019141 // Ndufa3 // NADH dehydrogenase (ubiquinone) 1 alpha subcomplex, 3 // 1q12 // 691001 /// ENSRNOT00000066941 // Ndufa3 // NADH dehydrogenase (ubiquinone) 1 alpha subcomplex, 3 // 1q12 // 691001 /// XM_001076462 // Ndufa3 // NADH dehydrogenase (ubiquinone) 1 alpha subcomplex, 3 // 1q12 // 691001	ENSRNOT00000019141 // ENSEMBL // NADH dehydrogenase (ubiquinone) 1 alpha subcomplex, 3 gene:ENSRNOG00000014224 // chr1 // 100 // 100 // 12 // 12 // 0 /// ENSRNOT00000066941 // ENSEMBL // 9 kDa protein gene:ENSRNOG00000014224 // chr1 // 100 // 100 // 12 // 12 // 0 /// FQ223729 // GenBank // Rattus norvegicus TL0ACA88YL13 mRNA sequence. // chr1 // 92 // 100 // 11 // 12 // 0 /// XM_001076462 // RefS…	---	ENSRNOT00000019141 // GO:0005739 // mitochondrion // not recorded /// ENSRNOT00000019141 // GO:0005743 // mitochondrial inner membrane // not recorded /// ENSRNOT00000019141 // GO:0005747 // mitochondrial respiratory chain complex I // not recorded /// ENSRNOT00000066941 // GO:0005739 // mitochondrion // not recorded /// ENSRNOT00000066941 // GO:0005743 // mitochondrial inner membrane // not reco…	---	---
Pgk1	phosphoglycerate kinase 1 (Pgk1), mRNA.	3.28424	-2.2195		3.28424	-2.2195		NM_053291	---	---	NM_053291 // Pgk1 // phosphoglycerate kinase 1 // Xq31 // 24644 /// ENSRNOT00000003390 // Pgk1 // phosphoglycerate kinase 1 // Xq31 // 24644 /// BC063161 // Pgk1 // phosphoglycerate kinase 1 // Xq31 // 24644	NM_053291 // RefSeq // Rattus norvegicus phosphoglycerate kinase 1 (Pgk1), mRNA. // chrX // 100 // 91 // 20 // 20 // 0 /// ENSRNOT00000003390 // ENSEMBL // Phosphoglycerate kinase 1 gene:ENSRNOG00000002467 // chrX // 100 // 100 // 22 // 22 // 0 /// BC063161 // GenBank // Rattus norvegicus phosphoglycerate kinase 1, mRNA (cDNA clone MGC:72752 IMAGE:6921844), complete cds. // chrX // 100 // 100 // …	NM_053291 // GO:0005975 // carbohydrate metabolic process // inferred from direct assay /// NM_053291 // GO:0006094 // gluconeogenesis // inferred from direct assay /// NM_053291 // GO:0006094 // gluconeogenesis // inferred from mutant phenotype /// NM_053291 // GO:0006096 // glycolysis // inferred from direct assay /// NM_053291 // GO:0006096 // glycolysis // inferred from mutant phenotype /// N…	NM_053291 // GO:0005625 // soluble fraction // inferred from direct assay /// NM_053291 // GO:0005737 // cytoplasm // inferred from electronic annotation /// NM_053291 // GO:0005829 // cytosol // inferred from direct assay /// ENSRNOT00000003390 // GO:0005625 // soluble fraction // inferred from direct assay /// ENSRNOT00000003390 // GO:0005737 // cytoplasm // inferred from electronic annotation …	NM_053291 // GO:0000166 // nucleotide binding // inferred from electronic annotation /// NM_053291 // GO:0004618 // phosphoglycerate kinase activity // inferred from direct assay /// NM_053291 // GO:0004618 // phosphoglycerate kinase activity // inferred from mutant phenotype /// NM_053291 // GO:0004618 // phosphoglycerate kinase activity // not recorded /// NM_053291 // GO:0004618 // phosphoglyc…	BC063161 // GenMAPP // Glycolysis_and_Gluconeogenesis		-1.59551						-1.59551			-1.59551					-1.59551			-1.59551	-1.59551
Acta1	actin, alpha 1, skeletal muscle (Acta1), mRNA.	3.27818	-2.21672		3.27818	-2.21672		NM_019212	---	---	NM_019212 // Acta1 // actin, alpha 1, skeletal muscle // 19q12 // 29437 /// ENSRNOT00000024084 // Acta1 // actin, alpha 1, skeletal muscle // 19q12 // 29437 /// BC061974 // Acta1 // actin, alpha 1, skeletal muscle // 19q12 // 29437	NM_019212 // RefSeq // Rattus norvegicus actin, alpha 1, skeletal muscle (Acta1), mRNA. // chr19 // 100 // 100 // 28 // 28 // 0 /// ENSRNOT00000024084 // ENSEMBL // Actin, alpha skeletal muscle gene:ENSRNOG00000017786 // chr19 // 100 // 100 // 28 // 28 // 0 /// BC061974 // GenBank // Rattus norvegicus actin, alpha 1, skeletal muscle, mRNA (cDNA clone MGC:72490 IMAGE:5623909), complete cds. // chr…	NM_019212 // GO:0009612 // response to mechanical stimulus // inferred from expression pattern /// NM_019212 // GO:0009991 // response to extracellular stimulus // inferred from expression pattern /// NM_019212 // GO:0010226 // response to lithium ion // inferred from expression pattern /// NM_019212 // GO:0016049 // cell growth // inferred from expression pattern /// NM_019212 // GO:0030240 // s…	NM_019212 // GO:0001725 // stress fiber // not recorded /// NM_019212 // GO:0001725 // stress fiber // inferred from sequence or structural similarity /// NM_019212 // GO:0005575 // cellular_component // no biological data available /// NM_019212 // GO:0005737 // cytoplasm // inferred from electronic annotation /// NM_019212 // GO:0005865 // striated muscle thin filament // not recorded /// NM_01…	NM_019212 // GO:0000166 // nucleotide binding // inferred from electronic annotation /// NM_019212 // GO:0005515 // protein binding // inferred from electronic annotation /// NM_019212 // GO:0005515 // protein binding // not recorded /// NM_019212 // GO:0005524 // ATP binding // inferred from electronic annotation /// ENSRNOT00000024084 // GO:0000166 // nucleotide binding // inferred from electro…	---									1.74953	1.73824										1.74389
Clybl	citrate lyase beta like (Clybl), mRNA.	3.23224	-2.21671		3.23224	-2.21671		NM_001100685	---	---	NM_001100685 // Clybl // citrate lyase beta like // 15q25 // 306198 /// ENSRNOT00000018918 // Clybl // citrate lyase beta like // 15q25 // 306198 /// ENSRNOT00000042049 // Clybl // citrate lyase beta like // 15q25 // 306198 /// ENSRNOT00000057439 // Clybl // citrate lyase beta like // 15q25 // 306198	NM_001100685 // RefSeq // Rattus norvegicus citrate lyase beta like (Clybl), mRNA. // chr15 // 100 // 100 // 27 // 27 // 0 /// ENSRNOT00000018918 // ENSEMBL // Isoform 1 of Citrate lyase subunit beta-like protein, mitochondrial gene:ENSRNOG00000014075 // chr15 // 100 // 100 // 27 // 27 // 0 /// ENSRNOT00000042049 // ENSEMBL // Isoform 2 of Citrate lyase subunit beta-like protein, mitochondrial ge…	NM_001100685 // GO:0006725 // cellular aromatic compound metabolic process // inferred from electronic annotation /// ENSRNOT00000018918 // GO:0006725 // cellular aromatic compound metabolic process // inferred from electronic annotation /// ENSRNOT00000042049 // GO:0006725 // cellular aromatic compound metabolic process // inferred from electronic annotation /// ENSRNOT00000057439 // GO:0006725 …	NM_001100685 // GO:0005739 // mitochondrion // inferred from electronic annotation /// NM_001100685 // GO:0005739 // mitochondrion // not recorded /// NM_001100685 // GO:0009346 // citrate lyase complex // inferred from electronic annotation /// ENSRNOT00000018918 // GO:0005739 // mitochondrion // inferred from electronic annotation /// ENSRNOT00000018918 // GO:0005739 // mitochondrion // not rec…	NM_001100685 // GO:0008815 // citrate (pro-3S)-lyase activity // inferred from electronic annotation /// NM_001100685 // GO:0016830 // carbon-carbon lyase activity // inferred from electronic annotation /// NM_001100685 // GO:0046872 // metal ion binding // inferred from electronic annotation /// ENSRNOT00000018918 // GO:0008815 // citrate (pro-3S)-lyase activity // inferred from electronic annot…	---
Ndufa9	NADH dehydrogenase (ubiquinone) 1 alpha subcomplex, 9 (Ndufa9), mRNA.	4.64287	-2.21207	2.09889	4.64287	-2.21207	2.09889	NM_001100752	---	---	NM_001100752 // Ndufa9 // NADH dehydrogenase (ubiquinone) 1 alpha subcomplex, 9 // 4q42 // 362440 /// ENSRNOT00000037176 // Ndufa9 // NADH dehydrogenase (ubiquinone) 1 alpha subcomplex, 9 // 4q42 // 362440 /// BC168777 // Ndufa9 // NADH dehydrogenase (ubiquinone) 1 alpha subcomplex, 9 // 4q42 // 362440	NM_001100752 // RefSeq // Rattus norvegicus NADH dehydrogenase (ubiquinone) 1 alpha subcomplex, 9 (Ndufa9), nuclear gene encoding mitochondrial protein, mRNA. // chr4 // 100 // 100 // 32 // 32 // 0 /// ENSRNOT00000037176 // ENSEMBL // RCG30092 gene:ENSRNOG00000026930 // chr4 // 100 // 100 // 32 // 32 // 0 /// BC168777 // GenBank // Rattus norvegicus NADH dehydrogenase (ubiquinone) 1 alpha subcomp…	NM_001100752 // GO:0009749 // response to glucose stimulus // inferred from expression pattern /// ENSRNOT00000037176 // GO:0009749 // response to glucose stimulus // inferred from expression pattern /// BC168777 // GO:0009749 // response to glucose stimulus // inferred from expression pattern	NM_001100752 // GO:0005739 // mitochondrion // inferred from direct assay /// NM_001100752 // GO:0005739 // mitochondrion // inferred from electronic annotation /// NM_001100752 // GO:0005739 // mitochondrion // not recorded /// NM_001100752 // GO:0005743 // mitochondrial inner membrane // inferred from electronic annotation /// NM_001100752 // GO:0005743 // mitochondrial inner membrane // not re…	NM_001100752 // GO:0003674 // molecular_function // no biological data available /// NM_001100752 // GO:0003824 // catalytic activity // inferred from electronic annotation /// NM_001100752 // GO:0003954 // NADH dehydrogenase activity // inferred from electronic annotation /// NM_001100752 // GO:0003954 // NADH dehydrogenase activity // not recorded /// NM_001100752 // GO:0005515 // protein bindi…	---
Slc25a32	solute carrier family 25, member 32, mRNA (cDNA clone MGC:188123 IMAGE:7189614), complete cds.	1.97216	-2.211		1.97216	-2.211		BC166530	---	---	NM_001173334 // Slc25a32 // solute carrier family 25, member 32 // 7q22 // 315023 /// ENSRNOT00000006029 // Slc25a32 // solute carrier family 25, member 32 // 7q22 // 315023 /// BC166530 // Slc25a32 // solute carrier family 25, member 32 // 7q22 // 315023	NM_001173334 // RefSeq // Rattus norvegicus solute carrier family 25, member 32 (Slc25a32), nuclear gene encoding mitochondrial protein, mRNA. // chr7 // 100 // 96 // 25 // 25 // 0 /// ENSRNOT00000006029 // ENSEMBL // Solute carrier family 25, member 32 gene:ENSRNOG00000004403 // chr7 // 100 // 96 // 25 // 25 // 0 /// BC166530 // GenBank // Rattus norvegicus solute carrier family 25, member 32, m…	NM_001173334 // GO:0055085 // transmembrane transport // inferred from electronic annotation /// ENSRNOT00000006029 // GO:0055085 // transmembrane transport // inferred from electronic annotation /// BC166530 // GO:0055085 // transmembrane transport // inferred from electronic annotation	NM_001173334 // GO:0005739 // mitochondrion // inferred from electronic annotation /// NM_001173334 // GO:0005739 // mitochondrion // not recorded /// NM_001173334 // GO:0005743 // mitochondrial inner membrane // inferred from electronic annotation /// NM_001173334 // GO:0016020 // membrane // inferred from electronic annotation /// NM_001173334 // GO:0016021 // integral to membrane // inferred f…	NM_001173334 // GO:0005215 // transporter activity // inferred from electronic annotation /// NM_001173334 // GO:0005488 // binding // inferred from electronic annotation /// ENSRNOT00000006029 // GO:0005215 // transporter activity // inferred from electronic annotation /// ENSRNOT00000006029 // GO:0005488 // binding // inferred from electronic annotation /// BC166530 // GO:0005215 // transporter…	---															1.88029					1.88029
Ppa2	pyrophosphatase (inorganic) 2 (Ppa2), nuclear gene encoding mitochondrial protein, mRNA.	4.23469	-2.20873	1.91725	4.23469	-2.20873	1.91725	NM_001135871	---	---	NM_001135871 // Ppa2 // pyrophosphatase (inorganic) 2 // 2q43 // 310856 /// ENSRNOT00000016195 // Ppa2 // pyrophosphatase (inorganic) 2 // 2q43 // 310856	NM_001135871 // RefSeq // Rattus norvegicus pyrophosphatase (inorganic) 2 (Ppa2), nuclear gene encoding mitochondrial protein, mRNA. // chr2 // 100 // 92 // 24 // 24 // 0 /// ENSRNOT00000016195 // ENSEMBL // Uncharacterized protein gene:ENSRNOG00000012091 // chr2 // 100 // 92 // 24 // 24 // 0	NM_001135871 // GO:0006796 // phosphate metabolic process // inferred from electronic annotation /// NM_001135871 // GO:0071344 // diphosphate metabolic process // not recorded /// ENSRNOT00000016195 // GO:0006796 // phosphate metabolic process // inferred from electronic annotation /// ENSRNOT00000016195 // GO:0071344 // diphosphate metabolic process // not recorded	NM_001135871 // GO:0005737 // cytoplasm // inferred from electronic annotation /// NM_001135871 // GO:0005739 // mitochondrion // not recorded /// NM_001135871 // GO:0005759 // mitochondrial matrix // not recorded /// ENSRNOT00000016195 // GO:0005737 // cytoplasm // inferred from electronic annotation /// ENSRNOT00000016195 // GO:0005739 // mitochondrion // not recorded /// ENSRNOT00000016195 // …	NM_001135871 // GO:0000287 // magnesium ion binding // inferred from electronic annotation /// NM_001135871 // GO:0004427 // inorganic diphosphatase activity // inferred from electronic annotation /// NM_001135871 // GO:0004427 // inorganic diphosphatase activity // not recorded /// ENSRNOT00000016195 // GO:0000287 // magnesium ion binding // inferred from electronic annotation /// ENSRNOT0000001…	---			1.80029			1.53757	1.83979	1.72588			1.70108		1.51451		1.55556	1.59038			1.55348	1.64954
Lrrc10	leucine-rich repeat-containing 10 (Lrrc10), mRNA.	3.40269	-2.20286	1.54467	3.40269	-2.20286	1.54467	NM_001108096	---	---	NM_001108096 // Lrrc10 // leucine-rich repeat-containing 10 // 7q22 // 314848 /// ENSRNOT00000007338 // Lrrc10 // leucine-rich repeat-containing 10 // 7q22 // 314848	NM_001108096 // RefSeq // Rattus norvegicus leucine-rich repeat-containing 10 (Lrrc10), mRNA. // chr7 // 100 // 100 // 25 // 25 // 0 /// ENSRNOT00000007338 // ENSEMBL // Uncharacterized protein gene:ENSRNOG00000005555 // chr7 // 100 // 100 // 25 // 25 // 0	---	NM_001108096 // GO:0005634 // nucleus // not recorded /// NM_001108096 // GO:0005739 // mitochondrion // not recorded /// NM_001108096 // GO:0005856 // cytoskeleton // not recorded /// NM_001108096 // GO:0030016 // myofibril // not recorded /// ENSRNOT00000007338 // GO:0005634 // nucleus // not recorded /// ENSRNOT00000007338 // GO:0005739 // mitochondrion // not recorded /// ENSRNOT00000007338 /…	NM_001108096 // GO:0005515 // protein binding // inferred from electronic annotation /// ENSRNOT00000007338 // GO:0005515 // protein binding // inferred from electronic annotation	---
Cbr4	carbonyl reductase 4 (Cbr4), mRNA.	6.00427	-2.20139	2.72749	6.00427	-2.20139	2.72749	NM_182672	---	---	NM_182672 // Cbr4 // carbonyl reductase 4 // 16p12 // 359725 /// ENSRNOT00000032199 // Cbr4 // carbonyl reductase 4 // 16p12 // 359725 /// AY305858 // Cbr4 // carbonyl reductase 4 // 16p12 // 359725	NM_182672 // RefSeq // Rattus norvegicus carbonyl reductase 4 (Cbr4), mRNA. // chr16 // 100 // 100 // 38 // 38 // 0 /// ENSRNOT00000032199 // ENSEMBL // Carbonyl reductase family member 4 gene:ENSRNOG00000024411 // chr16 // 100 // 100 // 38 // 38 // 0 /// AY305858 // GenBank // Rattus norvegicus carbonyl reductase 4 (Cbr4) mRNA, complete cds. // chr16 // 100 // 100 // 38 // 38 // 0	NM_182672 // GO:0006633 // fatty acid biosynthetic process // inferred from electronic annotation /// NM_182672 // GO:0051289 // protein homotetramerization // inferred from electronic annotation /// NM_182672 // GO:0051289 // protein homotetramerization // not recorded /// NM_182672 // GO:0055114 // oxidation reduction // inferred from electronic annotation /// ENSRNOT00000032199 // GO:0006633 /…	NM_182672 // GO:0005739 // mitochondrion // inferred from electronic annotation /// NM_182672 // GO:0005739 // mitochondrion // not recorded /// NM_182672 // GO:0005759 // mitochondrial matrix // not recorded /// NM_182672 // GO:0005759 // mitochondrial matrix // inferred from sequence or structural similarity /// ENSRNOT00000032199 // GO:0005739 // mitochondrion // inferred from electronic annot…	NM_182672 // GO:0005515 // protein binding // inferred from electronic annotation /// NM_182672 // GO:0005515 // protein binding // not recorded /// NM_182672 // GO:0008753 // NADPH dehydrogenase (quinone) activity // not recorded /// NM_182672 // GO:0008753 // NADPH dehydrogenase (quinone) activity // inferred from sequence or structural similarity /// NM_182672 // GO:0016491 // oxidoreductase a…	---					1.73826			1.73826			1.73826		1.50771		1.90617	1.71738			1.71042	1.71738
Auh	AU RNA binding protein/enoyl-coenzyme A hydratase (Auh), nuclear gene encoding mitochondrial protein, mRNA.	3.24839	-2.2		3.24839			NM_001108407	---	---	NM_001108407 // Auh // AU RNA binding protein/enoyl-coenzyme A hydratase // 17p14 // 361215 /// ENSRNOT00000015786 // Auh // AU RNA binding protein/enoyl-coenzyme A hydratase // 17p14 // 361215	NM_001108407 // RefSeq // Rattus norvegicus AU RNA binding protein/enoyl-coenzyme A hydratase (Auh), nuclear gene encoding mitochondrial protein, mRNA. // chr17 // 100 // 90 // 27 // 27 // 0 /// ENSRNOT00000015786 // ENSEMBL // AU RNA binding protein/enoyl-Coenzyme A hydratase gene:ENSRNOG00000011684 // chr17 // 100 // 100 // 30 // 30 // 0	NM_001108407 // GO:0006402 // mRNA catabolic process // not recorded /// NM_001108407 // GO:0008150 // biological_process // no biological data available /// NM_001108407 // GO:0008152 // metabolic process // not recorded /// ENSRNOT00000015786 // GO:0006402 // mRNA catabolic process // not recorded /// ENSRNOT00000015786 // GO:0008150 // biological_process // no biological data available /// ENS…	NM_001108407 // GO:0005575 // cellular_component // no biological data available /// NM_001108407 // GO:0005739 // mitochondrion // not recorded /// ENSRNOT00000015786 // GO:0005575 // cellular_component // no biological data available /// ENSRNOT00000015786 // GO:0005739 // mitochondrion // not recorded	NM_001108407 // GO:0003674 // molecular_function // no biological data available /// NM_001108407 // GO:0003723 // RNA binding // not recorded /// NM_001108407 // GO:0003730 // mRNA 3'-UTR binding // not recorded /// NM_001108407 // GO:0003824 // catalytic activity // inferred from electronic annotation /// NM_001108407 // GO:0004300 // enoyl-CoA hydratase activity // not recorded /// ENSRNOT0000…	---		1.50344		1.51218				1.50781		-1.79867	-0.14543		1.68522		1.65167	0.348197			1.22836	0.910768
Bfar	bifunctional apoptosis regulator (Bfar), mRNA.	2.09689	-2.2		2.09689			NM_001013125	---	---	NM_001013125 // Bfar // bifunctional apoptosis regulator // 10q11 // 304709 /// ENSRNOT00000004217 // Bfar // bifunctional apoptosis regulator // 10q11 // 304709 /// BC087103 // Bfar // bifunctional apoptosis regulator // 10q11 // 304709	NM_001013125 // RefSeq // Rattus norvegicus bifunctional apoptosis regulator (Bfar), mRNA. // chr10 // 100 // 100 // 31 // 31 // 0 /// ENSRNOT00000004217 // ENSEMBL // Bifunctional apoptosis regulator gene:ENSRNOG00000003151 // chr10 // 100 // 100 // 31 // 31 // 0 /// BC087103 // GenBank // Rattus norvegicus bifunctional apoptosis regulator, mRNA (cDNA clone MGC:94697 IMAGE:7192877), complete cds…	NM_001013125 // GO:0006915 // apoptosis // inferred from electronic annotation /// NM_001013125 // GO:0006916 // anti-apoptosis // inferred from electronic annotation /// ENSRNOT00000004217 // GO:0006915 // apoptosis // inferred from electronic annotation /// ENSRNOT00000004217 // GO:0006916 // anti-apoptosis // inferred from electronic annotation /// BC087103 // GO:0006915 // apoptosis // inferr…	NM_001013125 // GO:0005624 // membrane fraction // inferred from electronic annotation /// NM_001013125 // GO:0005783 // endoplasmic reticulum // inferred from electronic annotation /// NM_001013125 // GO:0005789 // endoplasmic reticulum membrane // inferred from electronic annotation /// NM_001013125 // GO:0016020 // membrane // inferred from electronic annotation /// NM_001013125 // GO:0016021 …	NM_001013125 // GO:0005515 // protein binding // inferred from electronic annotation /// NM_001013125 // GO:0008270 // zinc ion binding // inferred from electronic annotation /// NM_001013125 // GO:0046872 // metal ion binding // inferred from electronic annotation /// ENSRNOT00000004217 // GO:0005515 // protein binding // inferred from electronic annotation /// ENSRNOT00000004217 // GO:0008270 /…	---
Fam96a	family with sequence similarity 96, member A (Fam96a), mRNA.	4.22437	-2.2		4.22437			NM_001008327	---	---	NM_001008327 // Fam96a // family with sequence similarity 96, member A // 8q24 // 300797 /// ENSRNOT00000022999 // Fam96a // family with sequence similarity 96, member A // 8q24 // 300797 /// BC086524 // Fam96a // family with sequence similarity 96, member A // 8q24 // 300797	NM_001008327 // RefSeq // Rattus norvegicus family with sequence similarity 96, member A (Fam96a), mRNA. // chr8 // 100 // 100 // 26 // 26 // 0 /// ENSRNOT00000022999 // ENSEMBL // Similar to RIKEN cDNA 5730536A07, isoform CRA_a gene:ENSRNOG00000017119 // chr8 // 100 // 100 // 26 // 26 // 0 /// BC086524 // GenBank // Rattus norvegicus family with sequence similarity 96, member A, mRNA (cDNA clone…	NM_001008327 // GO:0008150 // biological_process // no biological data available /// ENSRNOT00000022999 // GO:0008150 // biological_process // no biological data available /// BC086524 // GO:0008150 // biological_process // no biological data available	NM_001008327 // GO:0005575 // cellular_component // no biological data available /// ENSRNOT00000022999 // GO:0005575 // cellular_component // no biological data available /// BC086524 // GO:0005575 // cellular_component // no biological data available	NM_001008327 // GO:0003674 // molecular_function // no biological data available /// ENSRNOT00000022999 // GO:0003674 // molecular_function // no biological data available /// BC086524 // GO:0003674 // molecular_function // no biological data available	---
Gabarapl2	GABA(A) receptor-associated protein like 2 (Gabarapl2), mRNA.	3.72354	-2.2		3.72354			NM_022706	---	---	NM_022706 // Gabarapl2 // GABA(A) receptor-associated protein like 2 // 19q12 // 64670 /// AB003515 // Gabarapl2 // GABA(A) receptor-associated protein like 2 // 19q12 // 64670 /// ENSRNOT00000029187 // RGD1562165 // similar to GABA(A) receptor-associated protein like 2 // 5q24 // 366374	NM_022706 // RefSeq // Rattus norvegicus GABA(A) receptor-associated protein like 2 (Gabarapl2), mRNA. // chr8 // 100 // 100 // 38 // 38 // 0 /// AB003515 // GenBank // Rattus norvegicus mRNA for GEF-2, complete cds. // chr8 // 100 // 100 // 38 // 38 // 0 /// ENSRNOT00000029187 // ENSEMBL // Gamma-aminobutyric acid receptor-associated protein-like 2-like, partial gene:ENSRNOG00000027547 // chr8 /…	NM_022706 // GO:0008150 // biological_process // no biological data available /// NM_022706 // GO:0015031 // protein transport // inferred from electronic annotation /// AB003515 // GO:0008150 // biological_process // no biological data available /// AB003515 // GO:0015031 // protein transport // inferred from electronic annotation	NM_022706 // GO:0000139 // Golgi membrane // not recorded /// NM_022706 // GO:0000421 // autophagic vacuole membrane // not recorded /// NM_022706 // GO:0005575 // cellular_component // no biological data available /// NM_022706 // GO:0005622 // intracellular // not recorded /// NM_022706 // GO:0005624 // membrane fraction // not recorded /// NM_022706 // GO:0005794 // Golgi apparatus // inferred…	NM_022706 // GO:0003674 // molecular_function // no biological data available /// NM_022706 // GO:0005515 // protein binding // not recorded /// AB003515 // GO:0003674 // molecular_function // no biological data available /// AB003515 // GO:0005515 // protein binding // not recorded	---										-1.53591										-1.53591
Kbtbd10	kelch repeat and BTB (POZ) domain containing 10 (Kbtbd10), mRNA.	4.4909	-2.2		4.4909			NM_057191	---	---	NM_057191 // Kbtbd10 // kelch repeat and BTB (POZ) domain containing 10 // 3q21 // 117537 /// ENSRNOT00000009969 // Kbtbd10 // kelch repeat and BTB (POZ) domain containing 10 // 3q21 // 117537	NM_057191 // RefSeq // Rattus norvegicus kelch repeat and BTB (POZ) domain containing 10 (Kbtbd10), mRNA. // chr3 // 96 // 92 // 22 // 23 // 0 /// ENSRNOT00000009969 // ENSEMBL // Kelch repeat and BTB domain-containing protein 10 gene:ENSRNOG00000007461 // chr3 // 100 // 100 // 25 // 25 // 0	NM_057191 // GO:0006928 // cellular component movement // non-traceable author statement /// NM_057191 // GO:0031275 // regulation of lateral pseudopodium assembly // inferred from mutant phenotype /// ENSRNOT00000009969 // GO:0006928 // cellular component movement // non-traceable author statement /// ENSRNOT00000009969 // GO:0031275 // regulation of lateral pseudopodium assembly // inferred fro…	NM_057191 // GO:0001726 // ruffle // inferred from electronic annotation /// NM_057191 // GO:0005737 // cytoplasm // inferred from direct assay /// NM_057191 // GO:0005737 // cytoplasm // not recorded /// NM_057191 // GO:0005856 // cytoskeleton // inferred from electronic annotation /// NM_057191 // GO:0005886 // plasma membrane // inferred from electronic annotation /// NM_057191 // GO:0005886 /…	NM_057191 // GO:0005515 // protein binding // inferred from physical interaction /// ENSRNOT00000009969 // GO:0005515 // protein binding // inferred from physical interaction	---		-1.52158	-1.83408	-1.5184	-1.57843	-2.72131	-1.94515	-1.85316			-2.02451					-2.02451	-1.66605	-1.69217	-1.79424	-1.80965
Tmem147	transmembrane protein 147 (Tmem147), mRNA.	4.02012	-2.2		4.02012			NM_001038494	---	---	NM_001038494 // Tmem147 // transmembrane protein 147 // 1q21 // 292792 /// ENSRNOT00000028514 // Tmem147 // transmembrane protein 147 // 1q21 // 292792 /// BC111082 // Tmem147 // transmembrane protein 147 // 1q21 // 292792	NM_001038494 // RefSeq // Rattus norvegicus transmembrane protein 147 (Tmem147), mRNA. // chr1 // 100 // 100 // 25 // 25 // 0 /// ENSRNOT00000028514 // ENSEMBL // Transmembrane protein 147 gene:ENSRNOG00000021006 // chr1 // 100 // 100 // 25 // 25 // 0 /// BC111082 // GenBank // Rattus norvegicus transmembrane protein 147, mRNA (cDNA clone MGC:125231 IMAGE:7455198), complete cds. // chr1 // 100 //…	---	NM_001038494 // GO:0016020 // membrane // inferred from electronic annotation /// NM_001038494 // GO:0016021 // integral to membrane // inferred from electronic annotation /// ENSRNOT00000028514 // GO:0016020 // membrane // inferred from electronic annotation /// ENSRNOT00000028514 // GO:0016021 // integral to membrane // inferred from electronic annotation /// BC111082 // GO:0016020 // membrane …	NM_001038494 // GO:0005515 // protein binding // inferred from electronic annotation /// NM_001038494 // GO:0005515 // protein binding // not recorded /// ENSRNOT00000028514 // GO:0005515 // protein binding // inferred from electronic annotation /// ENSRNOT00000028514 // GO:0005515 // protein binding // not recorded /// BC111082 // GO:0005515 // protein binding // inferred from electronic annotat…	---
Eno1	enolase 1, (alpha) (Eno1), transcript variant 1, mRNA.	1.80086	-2.19844		1.79558	-2.19844		NM_012554	GenMAPP	Glycolysis_and_Gluconeogenesis	NM_012554 // Eno1 // enolase 1, (alpha) // 5q36 // 24333 /// NM_001109908 // Eno1 // enolase 1, (alpha) // 5q36 // 24333 /// ENSRNOT00000024106 // Eno1 // enolase 1, (alpha) // 5q36 // 24333 /// BC091572 // Eno1 // enolase 1, (alpha) // 5q36 // 24333 /// ENSRNOT00000066461 // Eno1 // enolase 1, (alpha) // 5q36 // 24333 /// ENSRNOT00000066461 // Eno1 // enolase 1, (alpha) // 5q36 // 24333	NM_012554 // RefSeq // Rattus norvegicus enolase 1, (alpha) (Eno1), transcript variant 1, mRNA. // chr5 // 100 // 97 // 71 // 71 // 0 /// NM_001109908 // RefSeq // Rattus norvegicus enolase 1, (alpha) (Eno1), transcript variant 2, mRNA. // chr5 // 100 // 95 // 69 // 69 // 0 /// ENSRNOT00000024106 // ENSEMBL // Alpha-enolase gene:ENSRNOG00000017895 // chr5 // 100 // 97 // 71 // 71 // 0 /// BC09157…	NM_012554 // GO:0001701 // in utero embryonic development // not recorded /// NM_012554 // GO:0006096 // glycolysis // traceable author statement /// NM_012554 // GO:0008152 // metabolic process // not recorded /// NM_012554 // GO:0009615 // response to virus // not recorded /// NM_012554 // GO:0030308 // negative regulation of cell growth // not recorded /// NM_012554 // GO:0045892 // negative r…	NM_012554 // GO:0000015 // phosphopyruvate hydratase complex // inferred from electronic annotation /// NM_012554 // GO:0005575 // cellular_component // no biological data available /// NM_012554 // GO:0005625 // soluble fraction // inferred from direct assay /// NM_012554 // GO:0005626 // insoluble fraction // inferred from direct assay /// NM_012554 // GO:0005737 // cytoplasm // inferred from e…	NM_012554 // GO:0000287 // magnesium ion binding // inferred from electronic annotation /// NM_012554 // GO:0004252 // serine-type endopeptidase activity // inferred from electronic annotation /// NM_012554 // GO:0004634 // phosphopyruvate hydratase activity // inferred from direct assay /// NM_012554 // GO:0004634 // phosphopyruvate hydratase activity // not recorded /// NM_012554 // GO:0004634 …	NM_012554 // GenMAPP // Glycolysis_and_Gluconeogenesis	2.04105	-1.58395		-1.60029				-1.59212		1.73253	0.070205					0.901367	-1.77702	-1.6988	-0.858151	-0.48108
Rangrf	RAN guanine nucleotide release factor (Rangrf), mRNA.	2.03658	-2.19471		2.03658	-2.19471		NM_001105790	---	---	NM_001105790 // Rangrf // RAN guanine nucleotide release factor // 10q24 // 287419 /// ENSRNOT00000006883 // Rangrf // RAN guanine nucleotide release factor // 10q24 // 287419 /// ENSRNOT00000065648 // Rangrf // RAN guanine nucleotide release factor // 10q24 // 287419	NM_001105790 // RefSeq // Rattus norvegicus RAN guanine nucleotide release factor (Rangrf), mRNA. // chr10 // 100 // 76 // 16 // 16 // 0 /// ENSRNOT00000006883 // ENSEMBL // Uncharacterized protein gene:ENSRNOG00000004980 // chr10 // 100 // 76 // 16 // 16 // 0 /// ENSRNOT00000065648 // ENSEMBL // 8 kDa protein gene:ENSRNOG00000004980 // chr10 // 100 // 67 // 14 // 14 // 0	---	---	---	---
Mrpl13	mitochondrial ribosomal protein L13 (Mrpl13), nuclear gene encoding mitochondrial protein, mRNA.	4.69864	-2.19355	2.14202	4.69864	-2.19355	2.14202	NM_001006985	---	---	NM_001006985 // Mrpl13 // mitochondrial ribosomal protein L13 // 7q32 // 299938 /// ENSRNOT00000005815 // Mrpl13 // mitochondrial ribosomal protein L13 // 7q32 // 299938 /// BC084710 // Mrpl13 // mitochondrial ribosomal protein L13 // 7q32 // 299938	NM_001006985 // RefSeq // Rattus norvegicus mitochondrial ribosomal protein L13 (Mrpl13), nuclear gene encoding mitochondrial protein, mRNA. // chr7 // 100 // 100 // 27 // 27 // 0 /// ENSRNOT00000005815 // ENSEMBL // Mitochondrial ribosomal protein L13, isoform CRA_a gene:ENSRNOG00000004401 // chr7 // 100 // 100 // 27 // 27 // 0 /// BC084710 // GenBank // Rattus norvegicus mitochondrial ribosomal…	NM_001006985 // GO:0006412 // translation // inferred from electronic annotation /// ENSRNOT00000005815 // GO:0006412 // translation // inferred from electronic annotation /// BC084710 // GO:0006412 // translation // inferred from electronic annotation	NM_001006985 // GO:0005622 // intracellular // inferred from electronic annotation /// NM_001006985 // GO:0005739 // mitochondrion // not recorded /// NM_001006985 // GO:0005762 // mitochondrial large ribosomal subunit // not recorded /// NM_001006985 // GO:0005840 // ribosome // inferred from electronic annotation /// ENSRNOT00000005815 // GO:0005622 // intracellular // inferred from electronic …	NM_001006985 // GO:0003735 // structural constituent of ribosome // inferred from electronic annotation /// ENSRNOT00000005815 // GO:0003735 // structural constituent of ribosome // inferred from electronic annotation /// BC084710 // GO:0003735 // structural constituent of ribosome // inferred from electronic annotation	---	9.30196																			9.30196
Actr10	actin-related protein 10 homolog (S. cerevisiae) (Actr10), mRNA.	3.89859	-2.18972		3.89859	-2.18972		NM_001009602	---	---	NM_001009602 // Actr10 // actin-related protein 10 homolog (S. cerevisiae) // 6q24 // 299121 /// ENSRNOT00000010300 // Actr10 // actin-related protein 10 homolog (S. cerevisiae) // 6q24 // 299121 /// BC087143 // Actr10 // actin-related protein 10 homolog (S. cerevisiae) // 6q24 // 299121	NM_001009602 // RefSeq // Rattus norvegicus actin-related protein 10 homolog (S. cerevisiae) (Actr10), mRNA. // chr6 // 100 // 100 // 25 // 25 // 0 /// ENSRNOT00000010300 // ENSEMBL // Actin-related protein 10 homolog gene:ENSRNOG00000007504 // chr6 // 100 // 100 // 25 // 25 // 0 /// BC087143 // GenBank // Rattus norvegicus actin-related protein 10 homolog (S. cerevisiae), mRNA (cDNA clone MGC:95…	NM_001009602 // GO:0007018 // microtubule-based movement // not recorded /// ENSRNOT00000010300 // GO:0007018 // microtubule-based movement // not recorded /// BC087143 // GO:0007018 // microtubule-based movement // not recorded	NM_001009602 // GO:0005869 // dynactin complex // not recorded /// ENSRNOT00000010300 // GO:0005869 // dynactin complex // not recorded /// BC087143 // GO:0005869 // dynactin complex // not recorded	NM_001009602 // GO:0005515 // protein binding // inferred from electronic annotation /// NM_001009602 // GO:0005515 // protein binding // not recorded /// ENSRNOT00000010300 // GO:0005515 // protein binding // inferred from electronic annotation /// ENSRNOT00000010300 // GO:0005515 // protein binding // not recorded /// BC087143 // GO:0005515 // protein binding // inferred from electronic annotat…	---	3.77125														1.64977					2.71051
Srp	spermatogenesis-related protein (Srp) mRNA, complete cds.	3.49157	-2.18599																										-1.6335		-2.49069					-2.1
Ddt	D-dopachrome tautomerase (Ddt), mRNA.	2.69906	-2.15852		2.69906	-2.15852		NM_024131	---	---	NM_024131 // Ddt // D-dopachrome tautomerase // 20p12 // 29318 /// ENSRNOT00000001664 // Ddt // D-dopachrome tautomerase // 20p12 // 29318	NM_024131 // RefSeq // Rattus norvegicus D-dopachrome tautomerase (Ddt), mRNA. // chr20 // 100 // 96 // 25 // 25 // 0 /// ENSRNOT00000001664 // ENSEMBL // D-dopachrome decarboxylase gene:ENSRNOG00000001239 // chr20 // 100 // 100 // 26 // 26 // 0	NM_024131 // GO:0006954 // inflammatory response // non-traceable author statement /// NM_024131 // GO:0042438 // melanin biosynthetic process // inferred from electronic annotation /// ENSRNOT00000001664 // GO:0006954 // inflammatory response // non-traceable author statement /// ENSRNOT00000001664 // GO:0042438 // melanin biosynthetic process // inferred from electronic annotation	NM_024131 // GO:0005737 // cytoplasm // inferred from electronic annotation /// ENSRNOT00000001664 // GO:0005737 // cytoplasm // inferred from electronic annotation	NM_024131 // GO:0004167 // dopachrome isomerase activity // traceable author statement /// NM_024131 // GO:0005515 // protein binding // not recorded /// NM_024131 // GO:0016829 // lyase activity // inferred from electronic annotation /// NM_024131 // GO:0033981 // D-dopachrome decarboxylase activity // inferred from electronic annotation /// ENSRNOT00000001664 // GO:0004167 // dopachrome isomera…	---										1.7411										1.7411
Crip2	cysteine-rich protein 2 (Crip2), mRNA.	1.8851	-2.15425		1.8851	-2.15425		NM_022501	---	---	NM_022501 // Crip2 // cysteine-rich protein 2 // 6q32 // 338401 /// ENSRNOT00000006804 // Crip2 // cysteine-rich protein 2 // 6q32 // 338401 /// D17512 // Crip2 // cysteine-rich protein 2 // 6q32 // 338401	NM_022501 // RefSeq // Rattus norvegicus cysteine-rich protein 2 (Crip2), mRNA. // chrX // 44 // 100 // 7 // 16 // 0 /// ENSRNOT00000006804 // ENSEMBL // Cysteine-rich protein 2 gene:ENSRNOG00000005041 // chrX // 44 // 100 // 7 // 16 // 0 /// D17512 // GenBank // Rattus norvegicus CRP2 mRNA for cysteine-rich protein 2, complete cds. // chrX // 44 // 100 // 7 // 16 // 0 /// ENSRNOT00000003981 // E…	NM_022501 // GO:0008284 // positive regulation of cell proliferation // not recorded /// NM_022501 // GO:0030097 // hemopoiesis // not recorded /// ENSRNOT00000006804 // GO:0008284 // positive regulation of cell proliferation // not recorded /// ENSRNOT00000006804 // GO:0030097 // hemopoiesis // not recorded /// D17512 // GO:0008284 // positive regulation of cell proliferation // not recorded ///…	NM_022501 // GO:0031012 // extracellular matrix // not recorded /// ENSRNOT00000006804 // GO:0031012 // extracellular matrix // not recorded /// D17512 // GO:0031012 // extracellular matrix // not recorded	NM_022501 // GO:0008270 // zinc ion binding // inferred from electronic annotation /// NM_022501 // GO:0046872 // metal ion binding // inferred from electronic annotation /// ENSRNOT00000006804 // GO:0008270 // zinc ion binding // inferred from electronic annotation /// ENSRNOT00000006804 // GO:0046872 // metal ion binding // inferred from electronic annotation /// D17512 // GO:0008270 // zinc io…	---
Pla2g16	phospholipase A2, group XVI (Pla2g16), mRNA.	3.72569	-2.15077		3.72569	-2.15077		NM_017060	---	---	NM_017060 // Pla2g16 // phospholipase A2, group XVI // 1q43 // 24913 /// ENSRNOT00000032879 // Pla2g16 // phospholipase A2, group XVI // 1q43 // 24913 /// AB298805 // Pla2g16 // phospholipase A2, group XVI // 1q43 // 24913 /// ENSRNOT00000028796 // Pla2g16 // phospholipase A2, group XVI // 1q43 // 24913	NM_017060 // RefSeq // Rattus norvegicus phospholipase A2, group XVI (Pla2g16), mRNA. // chr1 // 100 // 100 // 38 // 38 // 0 /// ENSRNOT00000032879 // ENSEMBL // Group XVI phospholipase A2 gene:ENSRNOG00000021206 // chr1 // 100 // 100 // 38 // 38 // 0 /// AB298805 // GenBank // Rattus norvegicus RLP-3 mRNA for rat LRAT-like protein 3, complete cds. // chr1 // 100 // 100 // 38 // 38 // 0 /// ENSRN…	NM_017060 // GO:0016042 // lipid catabolic process // inferred from electronic annotation /// NM_017060 // GO:0045786 // negative regulation of cell cycle // inferred from mutant phenotype /// ENSRNOT00000032879 // GO:0016042 // lipid catabolic process // inferred from electronic annotation /// ENSRNOT00000032879 // GO:0045786 // negative regulation of cell cycle // inferred from mutant phenotype…	NM_017060 // GO:0005737 // cytoplasm // inferred from mutant phenotype /// NM_017060 // GO:0005886 // plasma membrane // inferred from mutant phenotype /// NM_017060 // GO:0016021 // integral to membrane // inferred from electronic annotation /// NM_017060 // GO:0048471 // perinuclear region of cytoplasm // inferred from electronic annotation /// ENSRNOT00000032879 // GO:0005737 // cytoplasm // i…	NM_017060 // GO:0003674 // molecular_function // no biological data available /// NM_017060 // GO:0004623 // phospholipase A2 activity // inferred from electronic annotation /// NM_017060 // GO:0005515 // protein binding // inferred from electronic annotation /// NM_017060 // GO:0005515 // protein binding // not recorded /// NM_017060 // GO:0016787 // hydrolase activity // inferred from electroni…	---
Gbe1	glucan (1,4-alpha-), branching enzyme 1, mRNA (cDNA clone IMAGE:7368249), partial cds.	2.45274	-2.14786		2.45274	-2.14786		BC090037	---	---	NM_001100502 // Gbe1 // glucan (1,4-alpha-), branching enzyme 1 // 11p11 // 288333	NM_001100502 // RefSeq // Rattus norvegicus glucan (1,4-alpha-), branching enzyme 1 (Gbe1), mRNA. // chr11 // 97 // 100 // 32 // 33 // 0	NM_001100502 // GO:0005975 // carbohydrate metabolic process // inferred from electronic annotation /// NM_001100502 // GO:0005978 // glycogen biosynthetic process // inferred from direct assay /// NM_001100502 // GO:0008150 // biological_process // no biological data available	NM_001100502 // GO:0005575 // cellular_component // no biological data available /// NM_001100502 // GO:0005625 // soluble fraction // inferred from direct assay /// NM_001100502 // GO:0005829 // cytosol // not recorded	NM_001100502 // GO:0003674 // molecular_function // no biological data available /// NM_001100502 // GO:0003824 // catalytic activity // inferred from electronic annotation /// NM_001100502 // GO:0003844 // 1,4-alpha-glucan branching enzyme activity // inferred from direct assay /// NM_001100502 // GO:0003844 // 1,4-alpha-glucan branching enzyme activity // not recorded /// NM_001100502 // GO:000…	---										-1.86014			1.62521		1.83813					0.5344
Cmc1	COX assembly mitochondrial protein homolog (S. cerevisiae) (Cmc1), nuclear gene encoding mitochondrial protein, mRNA.	6.65349	-2.13937	3.11003	6.65349	-2.13937	3.11003	NM_001135259	---	---	NM_001135259 // Cmc1 // COX assembly mitochondrial protein homolog (S. cerevisiae) // 8q32 // 363162 /// ENSRNOT00000013467 // Cmc1 // COX assembly mitochondrial protein homolog (S. cerevisiae) // 8q32 // 363162	NM_001135259 // RefSeq // Rattus norvegicus COX assembly mitochondrial protein homolog (S. cerevisiae) (Cmc1), nuclear gene encoding mitochondrial protein, mRNA. // chr8 // 100 // 69 // 18 // 18 // 0 /// ENSRNOT00000013467 // ENSEMBL // Uncharacterized protein gene:ENSRNOG00000010149 // chr8 // 100 // 100 // 26 // 26 // 0	---	NM_001135259 // GO:0005739 // mitochondrion // not recorded /// ENSRNOT00000013467 // GO:0005739 // mitochondrion // not recorded	---	---
Rg9mtd1	RNA (guanine-9-) methyltransferase domain containing 1 (Rg9mtd1), mRNA.	2.49843	-2.13779		2.49843	-2.13779		NM_001008337	---	---	NM_001008337 // Rg9mtd1 // RNA (guanine-9-) methyltransferase domain containing 1 // 11q12 // 304012 /// ENSRNOT00000002198 // Rg9mtd1 // RNA (guanine-9-) methyltransferase domain containing 1 // 11q12 // 304012 /// BC085895 // Rg9mtd1 // RNA (guanine-9-) methyltransferase domain containing 1 // 11q12 // 304012	NM_001008337 // RefSeq // Rattus norvegicus RNA (guanine-9-) methyltransferase domain containing 1 (Rg9mtd1), nuclear gene encoding mitochondrial protein, mRNA. // chr11 // 100 // 100 // 25 // 25 // 0 /// ENSRNOT00000002198 // ENSEMBL // Mitochondrial ribonuclease P protein 1 gene:ENSRNOG00000039567 // chr11 // 100 // 100 // 25 // 25 // 0 /// BC085895 // GenBank // Rattus norvegicus RNA (guanine-…	NM_001008337 // GO:0008033 // tRNA processing // inferred from electronic annotation /// ENSRNOT00000002198 // GO:0008033 // tRNA processing // inferred from electronic annotation /// BC085895 // GO:0008033 // tRNA processing // inferred from electronic annotation	NM_001008337 // GO:0005739 // mitochondrion // inferred from electronic annotation /// NM_001008337 // GO:0005739 // mitochondrion // not recorded /// ENSRNOT00000002198 // GO:0005739 // mitochondrion // inferred from electronic annotation /// ENSRNOT00000002198 // GO:0005739 // mitochondrion // not recorded /// BC085895 // GO:0005739 // mitochondrion // inferred from electronic annotation /// BC…	NM_001008337 // GO:0005515 // protein binding // inferred from electronic annotation /// NM_001008337 // GO:0005515 // protein binding // not recorded /// NM_001008337 // GO:0008168 // methyltransferase activity // inferred from electronic annotation /// NM_001008337 // GO:0016740 // transferase activity // inferred from electronic annotation /// ENSRNOT00000002198 // GO:0005515 // protein bindin…	---
Nudt8	similar to nudix-type motif 8 gene:ENSRNOG00000017955	2.98372	-2.12856		2.98372	-2.12856		ENSRNOT00000024237	---	---	---	ENSRNOT00000024237 // ENSEMBL // cdna:known chromosome:RGSC3.4:1:206583449:206584884:1 gene:ENSRNOG00000017955 // chr1 // 100 // 100 // 28 // 28 // 0 /// FQ217198 // GenBank // Rattus norvegicus TL0ACA32YI21 mRNA sequence. // chr1 // 100 // 57 // 16 // 16 // 0	---	---	---	---	2.23711																			2.23711
Mrpl41	mitochondrial ribosomal protein L41 (Mrpl41), nuclear gene encoding mitochondrial protein, mRNA.	3.27388	-2.12765		3.27388	-2.12765		NM_001013426	---	---	NM_001013426 // Mrpl41 // mitochondrial ribosomal protein L41 // 3p13 // 296551 /// ENSRNOT00000044802 // Mrpl41 // mitochondrial ribosomal protein L41 // 3p13 // 296551 /// BC091293 // Mrpl41 // mitochondrial ribosomal protein L41 // 3p13 // 296551 /// ENSRNOT00000043351 // RGD1560917 // similar to mitochondrial ribosomal protein L41 // 8q31 // 501028	NM_001013426 // RefSeq // Rattus norvegicus mitochondrial ribosomal protein L41 (Mrpl41), nuclear gene encoding mitochondrial protein, mRNA. // chr8 // 100 // 100 // 27 // 27 // 0 /// ENSRNOT00000044802 // ENSEMBL // 39S ribosomal protein L41, mitochondrial gene:ENSRNOG00000029875 // chr8 // 100 // 100 // 27 // 27 // 0 /// BC091293 // GenBank // Rattus norvegicus mitochondrial ribosomal protein L…	NM_001013426 // GO:0006412 // translation // not recorded /// NM_001013426 // GO:0006412 // translation // inferred from sequence or structural similarity /// NM_001013426 // GO:0006915 // apoptosis // inferred from electronic annotation /// NM_001013426 // GO:0007049 // cell cycle // inferred from electronic annotation /// ENSRNOT00000044802 // GO:0006412 // translation // not recorded /// ENSRN…	NM_001013426 // GO:0005739 // mitochondrion // inferred from electronic annotation /// NM_001013426 // GO:0005739 // mitochondrion // not recorded /// NM_001013426 // GO:0005762 // mitochondrial large ribosomal subunit // not recorded /// NM_001013426 // GO:0005762 // mitochondrial large ribosomal subunit // inferred from sequence or structural similarity /// NM_001013426 // GO:0005840 // ribosom…	NM_001013426 // GO:0003735 // structural constituent of ribosome // not recorded /// NM_001013426 // GO:0003735 // structural constituent of ribosome // inferred from sequence or structural similarity /// ENSRNOT00000044802 // GO:0003735 // structural constituent of ribosome // not recorded /// ENSRNOT00000044802 // GO:0003735 // structural constituent of ribosome // inferred from sequence or str…	---
Timm23	translocase of inner mitochondrial membrane 23 homolog (yeast) (Timm23), nuclear gene encoding mitochondrial protein, mRNA.	2.94275	-2.1274		2.89022	-2.03315		NM_019352	---	---	NM_019352 // Timm23 // translocase of inner mitochondrial membrane 23 homolog (yeast) // 16p16 // 54312 /// BC083559 // Timm23 // translocase of inner mitochondrial membrane 23 homolog (yeast) // 16p16 // 54312 /// ENSRNOT00000048004 // RGD1559672 // similar to Translocase of inner mitochondrial membrane 23 homolog // 6q23 // 500650	NM_019352 // RefSeq // Rattus norvegicus translocase of inner mitochondrial membrane 23 homolog (yeast) (Timm23), nuclear gene encoding mitochondrial protein, mRNA. // chr6 // 86 // 100 // 25 // 29 // 0 /// BC083559 // GenBank // Rattus norvegicus translocase of inner mitochondrial membrane 23 homolog (yeast), mRNA (cDNA clone MGC:93478 IMAGE:7135081), complete cds. // chr6 // 86 // 100 // 25 // …	NM_019352 // GO:0006886 // intracellular protein transport // inferred from mutant phenotype /// NM_019352 // GO:0055085 // transmembrane transport // inferred from electronic annotation /// BC083559 // GO:0006886 // intracellular protein transport // inferred from mutant phenotype /// BC083559 // GO:0055085 // transmembrane transport // inferred from electronic annotation /// ENSRNOT00000048004 …	NM_019352 // GO:0005739 // mitochondrion // inferred from electronic annotation /// NM_019352 // GO:0005739 // mitochondrion // not recorded /// NM_019352 // GO:0005743 // mitochondrial inner membrane // inferred from direct assay /// NM_019352 // GO:0005743 // mitochondrial inner membrane // not recorded /// NM_019352 // GO:0005744 // mitochondrial inner membrane presequence translocase complex …	NM_019352 // GO:0005515 // protein binding // inferred from physical interaction /// NM_019352 // GO:0008565 // protein transporter activity // inferred from electronic annotation /// NM_019352 // GO:0015450 // P-P-bond-hydrolysis-driven protein transmembrane transporter activity // inferred from electronic annotation /// NM_019352 // GO:0019899 // enzyme binding // inferred from physical interac…	---
Fam54b	family with sequence similarity 54, member B, mRNA (cDNA clone MGC:94559 IMAGE:7189448), complete cds.	3.24099	-2.12357		3.24099	-2.12357		BC083692	---	---	BC083692 // Fam54b // family with sequence similarity 54, member B // 5q36 // 298549 /// ENSRNOT00000022908 // Fam54b // family with sequence similarity 54, member B // 5q36 // 298549	BC083692 // GenBank // Rattus norvegicus family with sequence similarity 54, member B, mRNA (cDNA clone MGC:94559 IMAGE:7189448), complete cds. // chr5 // 100 // 100 // 28 // 28 // 0 /// ENSRNOT00000022908 // ENSEMBL // Protein FAM54B gene:ENSRNOG00000016937 // chr5 // 100 // 100 // 28 // 28 // 0	---	---	---	---							1.50482	1.50482			1.50482					1.50482			1.50482	1.50482
Lactb2	lactamase, beta 2 (Lactb2), mRNA.	3.91502	-2.1187	1.84784	3.91502	-2.1187	1.84784	NM_001024247	---	---	NM_001024247 // Lactb2 // lactamase, beta 2 // 5q11 // 297768 /// ENSRNOT00000010369 // Lactb2 // lactamase, beta 2 // 5q11 // 297768 /// BC093378 // Lactb2 // lactamase, beta 2 // 5q11 // 297768	NM_001024247 // RefSeq // Rattus norvegicus lactamase, beta 2 (Lactb2), mRNA. // chr5 // 100 // 100 // 26 // 26 // 0 /// ENSRNOT00000010369 // ENSEMBL // Beta-lactamase-like protein 2 gene:ENSRNOG00000007829 // chr5 // 100 // 100 // 26 // 26 // 0 /// BC093378 // GenBank // Rattus norvegicus lactamase, beta 2, mRNA (cDNA clone MGC:112672 IMAGE:7388096), complete cds. // chr5 // 100 // 100 // 26 //…	---	NM_001024247 // GO:0005739 // mitochondrion // inferred from electronic annotation /// NM_001024247 // GO:0005739 // mitochondrion // not recorded /// ENSRNOT00000010369 // GO:0005739 // mitochondrion // inferred from electronic annotation /// ENSRNOT00000010369 // GO:0005739 // mitochondrion // not recorded /// BC093378 // GO:0005739 // mitochondrion // inferred from electronic annotation /// BC…	NM_001024247 // GO:0016787 // hydrolase activity // inferred from electronic annotation /// NM_001024247 // GO:0046872 // metal ion binding // inferred from electronic annotation /// ENSRNOT00000010369 // GO:0016787 // hydrolase activity // inferred from electronic annotation /// ENSRNOT00000010369 // GO:0046872 // metal ion binding // inferred from electronic annotation /// BC093378 // GO:001678…	---		1.60193						1.60193			1.60193	1.50778	1.72391		2.96731	1.95023			2.21382	1.95023
Prdx5	peroxiredoxin 5 (Prdx5), nuclear gene encoding mitochondrial protein, mRNA.	2.85936	-2.10874		2.85936	-2.10874		NM_053610	---	---	NM_053610 // Prdx5 // peroxiredoxin 5 // 1q43 // 113898 /// ENSRNOT00000028687 // Prdx5 // peroxiredoxin 5 // 1q43 // 113898 /// AF110732 // Prdx5 // peroxiredoxin 5 // 1q43 // 113898 /// ENSRNOT00000050964 // Prdx5 // peroxiredoxin 5 // 1q43 // 113898	NM_053610 // RefSeq // Rattus norvegicus peroxiredoxin 5 (Prdx5), nuclear gene encoding mitochondrial protein, mRNA. // chr1 // 96 // 100 // 25 // 26 // 0 /// ENSRNOT00000028687 // ENSEMBL // Isoform Mitochondrial of Peroxiredoxin-5, mitochondrial gene:ENSRNOG00000021125 // chr1 // 100 // 100 // 26 // 26 // 0 /// AF110732 // GenBank // Rattus norvegicus antioxidant enzyme B166 mRNA, complete cds.…	NM_053610 // GO:0006979 // response to oxidative stress // inferred from electronic annotation /// NM_053610 // GO:0006979 // response to oxidative stress // not recorded /// NM_053610 // GO:0034614 // cellular response to reactive oxygen species // inferred from electronic annotation /// NM_053610 // GO:0034614 // cellular response to reactive oxygen species // not recorded /// NM_053610 // GO:0…	NM_053610 // GO:0005737 // cytoplasm // inferred from electronic annotation /// NM_053610 // GO:0005739 // mitochondrion // inferred from direct assay /// NM_053610 // GO:0005739 // mitochondrion // not recorded /// NM_053610 // GO:0005777 // peroxisome // inferred from direct assay /// NM_053610 // GO:0005777 // peroxisome // not recorded /// NM_053610 // GO:0044445 // cytosolic part // inferred…	NM_053610 // GO:0004601 // peroxidase activity // inferred from electronic annotation /// NM_053610 // GO:0004601 // peroxidase activity // not recorded /// NM_053610 // GO:0016491 // oxidoreductase activity // inferred from electronic annotation /// NM_053610 // GO:0043027 // caspase inhibitor activity // inferred from electronic annotation /// NM_053610 // GO:0043027 // caspase inhibitor activi…	---
Cyb5b	cytochrome b5 type B (outer mitochondrial membrane) (Cyb5b), nuclear gene encoding mitochondrial protein, mRNA.	2.1828	-2.10543		2.1828	-2.10543		NM_030586	---	---	NM_030586 // Cyb5b // cytochrome b5 type B (outer mitochondrial membrane) // 19q12 // 80773 /// ENSRNOT00000015006 // Cyb5b // cytochrome b5 type B (outer mitochondrial membrane) // 19q12 // 80773 /// BC072535 // Cyb5b // cytochrome b5 type B (outer mitochondrial membrane) // 19q12 // 80773	NM_030586 // RefSeq // Rattus norvegicus cytochrome b5 type B (outer mitochondrial membrane) (Cyb5b), nuclear gene encoding mitochondrial protein, mRNA. // chr19 // 100 // 100 // 26 // 26 // 0 /// ENSRNOT00000015006 // ENSEMBL // Cytochrome b5 type B gene:ENSRNOG00000011142 // chr19 // 100 // 100 // 26 // 26 // 0 /// BC072535 // GenBank // Rattus norvegicus cytochrome b5 type B (outer mitochondri…	---	NM_030586 // GO:0005739 // mitochondrion // inferred from electronic annotation /// NM_030586 // GO:0005739 // mitochondrion // not recorded /// NM_030586 // GO:0005741 // mitochondrial outer membrane // inferred from direct assay /// NM_030586 // GO:0005743 // mitochondrial inner membrane // inferred from electronic annotation /// NM_030586 // GO:0005743 // mitochondrial inner membrane // not re…	NM_030586 // GO:0005215 // transporter activity // inferred from electronic annotation /// NM_030586 // GO:0008047 // enzyme activator activity // inferred from direct assay /// NM_030586 // GO:0020037 // heme binding // inferred from electronic annotation /// NM_030586 // GO:0045153 // electron transporter, transferring electrons within CoQH2-cytochrome c reductase complex activity // traceable …	---						-1.62399		-1.62399			-1.62399					-1.62399			-1.62399	-1.62399
Cox19	COX19 cytochrome c oxidase assembly homolog (S. cerevisiae) (Cox19), mRNA.	2.149	-2.10432		2.149	-2.10432		NM_001107126	---	---	NM_001107126 // Cox19 // COX19 cytochrome c oxidase assembly homolog (S. cerevisiae) // 12q11 // 304330 /// ENSRNOT00000001735 // Cox19 // COX19 cytochrome c oxidase assembly homolog (S. cerevisiae) // 12q11 // 304330	NM_001107126 // RefSeq // Rattus norvegicus COX19 cytochrome c oxidase assembly homolog (S. cerevisiae) (Cox19), mRNA. // chr12 // 100 // 100 // 24 // 24 // 0 /// ENSRNOT00000001735 // ENSEMBL // Uncharacterized protein gene:ENSRNOG00000001290 // chr12 // 100 // 100 // 24 // 24 // 0	---	---	---	---
Idh3a	isocitrate dehydrogenase 3 (NAD+) alpha (Idh3a), nuclear gene encoding mitochondrial protein, mRNA.	2.37403	-2.10134		2.37403	-2.10134		NM_053638	---	---	NM_053638 // Idh3a // isocitrate dehydrogenase 3 (NAD+) alpha // 8q24 // 114096 /// ENSRNOT00000015102 // Idh3a // isocitrate dehydrogenase 3 (NAD+) alpha // 8q24 // 114096 /// AB047541 // Idh3a // isocitrate dehydrogenase 3 (NAD+) alpha // 8q24 // 114096	NM_053638 // RefSeq // Rattus norvegicus isocitrate dehydrogenase 3 (NAD+) alpha (Idh3a), nuclear gene encoding mitochondrial protein, mRNA. // chr8 // 97 // 100 // 34 // 35 // 0 /// ENSRNOT00000015102 // ENSEMBL // Isocitrate dehydrogenase [NAD] subunit alpha, mitochondrial gene:ENSRNOG00000010277 // chr8 // 100 // 91 // 32 // 32 // 0 /// AB047541 // GenBank // Rattus norvegicus mRNA for NAD+-sp…	NM_053638 // GO:0006099 // tricarboxylic acid cycle // inferred from direct assay /// NM_053638 // GO:0006102 // isocitrate metabolic process // inferred from direct assay /// NM_053638 // GO:0006103 // 2-oxoglutarate metabolic process // inferred from direct assay /// NM_053638 // GO:0006734 // NADH metabolic process // inferred from direct assay /// NM_053638 // GO:0055114 // oxidation reductio…	NM_053638 // GO:0005739 // mitochondrion // inferred from electronic annotation /// NM_053638 // GO:0005739 // mitochondrion // not recorded /// NM_053638 // GO:0005962 // mitochondrial isocitrate dehydrogenase complex (NAD+) // inferred by curator /// ENSRNOT00000015102 // GO:0005739 // mitochondrion // inferred from electronic annotation /// ENSRNOT00000015102 // GO:0005739 // mitochondrion // …	NM_053638 // GO:0000287 // magnesium ion binding // inferred from electronic annotation /// NM_053638 // GO:0004449 // isocitrate dehydrogenase (NAD+) activity // inferred from direct assay /// NM_053638 // GO:0016491 // oxidoreductase activity // inferred from electronic annotation /// NM_053638 // GO:0016616 // oxidoreductase activity, acting on the CH-OH group of donors, NAD or NADP as accepto…	AB047541 // GenMAPP // Krebs-TCA_Cycle	2.89568																			2.89568
Hspb8	heat shock protein 8 (Hspb8), mRNA.	3.70881	-2.1		3.70881			NM_053612	---	---	NM_053612 // Hspb8 // heat shock protein B8 // 12q16 // 113906 /// ENSRNOT00000039275 // Hspb8 // heat shock protein B8 // 12q16 // 113906 /// BC061748 // Hspb8 // heat shock protein B8 // 12q16 // 113906	NM_053612 // RefSeq // Rattus norvegicus heat shock protein B8 (Hspb8), mRNA. // chr12 // 100 // 100 // 20 // 20 // 0 /// ENSRNOT00000039275 // ENSEMBL // Heat shock protein beta-8 gene:ENSRNOG00000022392 // chr12 // 100 // 100 // 20 // 20 // 0 /// BC061748 // GenBank // Rattus norvegicus heat shock protein 8, mRNA (cDNA clone MGC:72354 IMAGE:5599613), complete cds. // chr12 // 100 // 100 // 20 /…	NM_053612 // GO:0009408 // response to heat // inferred from electronic annotation /// ENSRNOT00000039275 // GO:0009408 // response to heat // inferred from electronic annotation /// BC061748 // GO:0009408 // response to heat // inferred from electronic annotation	NM_053612 // GO:0005622 // intracellular // not recorded /// NM_053612 // GO:0005634 // nucleus // inferred from sequence or structural similarity /// NM_053612 // GO:0005737 // cytoplasm // inferred from sequence or structural similarity /// ENSRNOT00000039275 // GO:0005622 // intracellular // not recorded /// ENSRNOT00000039275 // GO:0005634 // nucleus // inferred from sequence or structural si…	NM_053612 // GO:0005515 // protein binding // not recorded /// NM_053612 // GO:0042802 // identical protein binding // not recorded /// ENSRNOT00000039275 // GO:0005515 // protein binding // not recorded /// ENSRNOT00000039275 // GO:0042802 // identical protein binding // not recorded /// BC061748 // GO:0005515 // protein binding // not recorded /// BC061748 // GO:0042802 // identical protein bin…	---			1.5749					1.5749			1.5749					1.5749			1.5749	1.5749
Cript	cysteine-rich PDZ-binding protein (Cript), mRNA.	4.22245	-2.1		4.22245			NM_019907	---	---	NM_019907 // Cript // cysteine-rich PDZ-binding protein // 6q12 // 56725 /// ENSRNOT00000020534 // Cript // cysteine-rich PDZ-binding protein // 6q12 // 56725 /// AF047384 // Cript // cysteine-rich PDZ-binding protein // 6q12 // 56725	NM_019907 // RefSeq // Rattus norvegicus cysteine-rich PDZ-binding protein (Cript), mRNA. // chr6 // 100 // 100 // 23 // 23 // 0 /// ENSRNOT00000020534 // ENSEMBL // Cysteine-rich PDZ-binding protein gene:ENSRNOG00000015215 // chr6 // 100 // 100 // 23 // 23 // 0 /// AF047384 // GenBank // Rattus norvegicus postsynaptic protein CRIPT mRNA, complete cds. // chr6 // 100 // 100 // 23 // 23 // 0	NM_019907 // GO:0031122 // cytoplasmic microtubule organization // inferred from direct assay /// NM_019907 // GO:0045184 // establishment of protein localization // inferred from direct assay /// ENSRNOT00000020534 // GO:0031122 // cytoplasmic microtubule organization // inferred from direct assay /// ENSRNOT00000020534 // GO:0045184 // establishment of protein localization // inferred from dire…	NM_019907 // GO:0005737 // cytoplasm // inferred from electronic annotation /// NM_019907 // GO:0014069 // postsynaptic density // inferred from direct assay /// NM_019907 // GO:0030054 // cell junction // inferred from electronic annotation /// NM_019907 // GO:0030425 // dendrite // inferred from direct assay /// NM_019907 // GO:0042995 // cell projection // inferred from electronic annotation /…	NM_019907 // GO:0005515 // protein binding // inferred from physical interaction /// NM_019907 // GO:0030165 // PDZ domain binding // inferred from direct assay /// NM_019907 // GO:0032403 // protein complex binding // inferred from physical interaction /// ENSRNOT00000020534 // GO:0005515 // protein binding // inferred from physical interaction /// ENSRNOT00000020534 // GO:0030165 // PDZ domain …	---															1.89578					1.89578
Grpel1	GrpE-like 1, mitochondrial (Grpel1), nuclear gene encoding mitochondrial protein, mRNA.	3.45245	-2.1		3.45245			NM_024487	---	---	NM_024487 // Grpel1 // GrpE-like 1, mitochondrial // 14q21 // 79563 /// ENSRNOT00000008932 // Grpel1 // GrpE-like 1, mitochondrial // 14q21 // 79563 /// BC097312 // Grpel1 // GrpE-like 1, mitochondrial // 14q21 // 79563	NM_024487 // RefSeq // Rattus norvegicus GrpE-like 1, mitochondrial (Grpel1), nuclear gene encoding mitochondrial protein, mRNA. // chr14 // 100 // 96 // 24 // 24 // 0 /// ENSRNOT00000008932 // ENSEMBL // GrpE protein homolog 1, mitochondrial gene:ENSRNOG00000006593 // chr14 // 100 // 100 // 25 // 25 // 0 /// BC097312 // GenBank // Rattus norvegicus GrpE-like 1, mitochondrial, mRNA (cDNA clone MG…	NM_024487 // GO:0006457 // protein folding // inferred from electronic annotation /// NM_024487 // GO:0030150 // protein import into mitochondrial matrix // inferred from electronic annotation /// ENSRNOT00000008932 // GO:0006457 // protein folding // inferred from electronic annotation /// ENSRNOT00000008932 // GO:0030150 // protein import into mitochondrial matrix // inferred from electronic an…	NM_024487 // GO:0005739 // mitochondrion // inferred from electronic annotation /// NM_024487 // GO:0005739 // mitochondrion // not recorded /// NM_024487 // GO:0005759 // mitochondrial matrix // inferred from electronic annotation /// NM_024487 // GO:0005759 // mitochondrial matrix // not recorded /// ENSRNOT00000008932 // GO:0005739 // mitochondrion // inferred from electronic annotation /// EN…	NM_024487 // GO:0000774 // adenyl-nucleotide exchange factor activity // inferred from electronic annotation /// NM_024487 // GO:0042803 // protein homodimerization activity // inferred from electronic annotation /// NM_024487 // GO:0051082 // unfolded protein binding // inferred from electronic annotation /// NM_024487 // GO:0051082 // unfolded protein binding // not recorded /// NM_024487 // GO…	---	1.89582														1.51558					1.7057
Nqo2	NAD(P)H dehydrogenase, quinone 2 (Nqo2), mRNA.	3.35618	-2.1		3.35618			NM_001004214	---	---	NM_001004214 // Nqo2 // NAD(P)H dehydrogenase, quinone 2 // 17p12 // 291084 /// ENSRNOT00000024141 // Nqo2 // NAD(P)H dehydrogenase, quinone 2 // 17p12 // 291084 /// BC079157 // Nqo2 // NAD(P)H dehydrogenase, quinone 2 // 17p12 // 291084	NM_001004214 // RefSeq // Rattus norvegicus NAD(P)H dehydrogenase, quinone 2 (Nqo2), mRNA. // chr17 // 100 // 100 // 24 // 24 // 0 /// ENSRNOT00000024141 // ENSEMBL // Ribosyldihydronicotinamide dehydrogenase [quinone] gene:ENSRNOG00000017820 // chr17 // 100 // 100 // 24 // 24 // 0 /// BC079157 // GenBank // Rattus norvegicus NAD(P)H dehydrogenase, quinone 2, mRNA (cDNA clone MGC:94180 IMAGE:7128…	NM_001004214 // GO:0007613 // memory // inferred from expression pattern /// NM_001004214 // GO:0055114 // oxidation reduction // inferred from electronic annotation /// ENSRNOT00000024141 // GO:0007613 // memory // inferred from expression pattern /// ENSRNOT00000024141 // GO:0055114 // oxidation reduction // inferred from electronic annotation /// BC079157 // GO:0007613 // memory // inferred fr…	NM_001004214 // GO:0005575 // cellular_component // no biological data available /// NM_001004214 // GO:0005737 // cytoplasm // inferred from electronic annotation /// ENSRNOT00000024141 // GO:0005575 // cellular_component // no biological data available /// ENSRNOT00000024141 // GO:0005737 // cytoplasm // inferred from electronic annotation /// BC079157 // GO:0005575 // cellular_component // no …	NM_001004214 // GO:0001512 // dihydronicotinamide riboside quinone reductase activity // inferred from electronic annotation /// NM_001004214 // GO:0003674 // molecular_function // no biological data available /// NM_001004214 // GO:0009055 // electron carrier activity // inferred from electronic annotation /// NM_001004214 // GO:0046872 // metal ion binding // inferred from electronic annotation…	---	2.46398									-1.74155										0.361215
Rpain	RPA interacting protein (Rpain), mRNA.	3.39596	-2.1		3.39596			NM_001033060	---	---	NM_001033060 // Rpain // RPA interacting protein // 10q24 // 287463 /// ENSRNOT00000044363 // Rpain // RPA interacting protein // 10q24 // 287463 /// AY775322 // Rpain // RPA interacting protein // 10q24 // 287463 /// ENSRNOT00000009082 // Rpain // RPA interacting protein // 10q24 // 287463	NM_001033060 // RefSeq // Rattus norvegicus RPA interacting protein (Rpain), mRNA. // chr10 // 100 // 100 // 25 // 25 // 0 /// ENSRNOT00000044363 // ENSEMBL // Isoform 2 of RPA-interacting protein gene:ENSRNOG00000006913 // chr10 // 100 // 100 // 25 // 25 // 0 /// AY775322 // GenBank // Rattus norvegicus RAP interaction protein alpha mRNA, complete cds. // chr10 // 100 // 100 // 25 // 25 // 0 ///…	NM_001033060 // GO:0006261 // DNA-dependent DNA replication // not recorded /// NM_001033060 // GO:0006281 // DNA repair // not recorded /// NM_001033060 // GO:0006310 // DNA recombination // not recorded /// NM_001033060 // GO:0006606 // protein import into nucleus // not recorded /// NM_001033060 // GO:0009411 // response to UV // not recorded /// ENSRNOT00000044363 // GO:0006261 // DNA-depende…	NM_001033060 // GO:0005634 // nucleus // inferred from electronic annotation /// NM_001033060 // GO:0005737 // cytoplasm // not recorded /// NM_001033060 // GO:0016605 // PML body // not recorded /// ENSRNOT00000044363 // GO:0005634 // nucleus // inferred from electronic annotation /// ENSRNOT00000044363 // GO:0005737 // cytoplasm // not recorded /// ENSRNOT00000044363 // GO:0016605 // PML body /…	NM_001033060 // GO:0032403 // protein complex binding // not recorded /// NM_001033060 // GO:0046872 // metal ion binding // inferred from electronic annotation /// ENSRNOT00000044363 // GO:0032403 // protein complex binding // not recorded /// ENSRNOT00000044363 // GO:0046872 // metal ion binding // inferred from electronic annotation /// AY775322 // GO:0032403 // protein complex binding // not …	---
Sar1b	SAR1 homolog B (S. cerevisiae) (Sar1b), mRNA.	5.12375	-2.1	2.39657	5.12375		2.39657	NM_001009622	---	---	NM_001009622 // Sar1b // SAR1 homolog B (S. cerevisiae) // 10q22 // 287276 /// ENSRNOT00000006567 // Sar1b // SAR1 homolog B (S. cerevisiae) // 10q22 // 287276 /// BC088842 // Sar1b // SAR1 homolog B (S. cerevisiae) // 10q22 // 287276	NM_001009622 // RefSeq // Rattus norvegicus SAR1 homolog B (S. cerevisiae) (Sar1b), mRNA. // chr10 // 100 // 100 // 26 // 26 // 0 /// ENSRNOT00000006567 // ENSEMBL // GTP-binding protein SAR1b gene:ENSRNOG00000004820 // chr10 // 100 // 100 // 26 // 26 // 0 /// BC088842 // GenBank // Rattus norvegicus SAR1 homolog B (S. cerevisiae), mRNA (cDNA clone MGC:105988 IMAGE:7303357), complete cds. // chr1…	NM_001009622 // GO:0006886 // intracellular protein transport // inferred from electronic annotation /// NM_001009622 // GO:0006888 // ER to Golgi vesicle-mediated transport // not recorded /// NM_001009622 // GO:0008150 // biological_process // no biological data available /// NM_001009622 // GO:0016044 // cellular membrane organization // not recorded /// NM_001009622 // GO:0016192 // vesicle-m…	NM_001009622 // GO:0005575 // cellular_component // no biological data available /// NM_001009622 // GO:0005622 // intracellular // inferred from electronic annotation /// NM_001009622 // GO:0005783 // endoplasmic reticulum // inferred from electronic annotation /// NM_001009622 // GO:0005783 // endoplasmic reticulum // not recorded /// NM_001009622 // GO:0005789 // endoplasmic reticulum membrane…	NM_001009622 // GO:0000166 // nucleotide binding // inferred from electronic annotation /// NM_001009622 // GO:0003674 // molecular_function // no biological data available /// NM_001009622 // GO:0005525 // GTP binding // inferred from electronic annotation /// NM_001009622 // GO:0046872 // metal ion binding // inferred from electronic annotation /// ENSRNOT00000006567 // GO:0000166 // nucleotide…	---															2.17984					2.17984
Sod2	superoxide dismutase 2, mitochondrial (Sod2), nuclear gene encoding mitochondrial protein, mRNA.	5.02442	-2.1	2.39618	5.02442		2.39618	NM_017051	GenMAPP	Oxidative_Stress	NM_017051 // Sod2 // superoxide dismutase 2, mitochondrial // 1q21 // 24787 /// ENSRNOT00000025794 // Sod2 // superoxide dismutase 2, mitochondrial // 1q21 // 24787 /// BC070913 // Sod2 // superoxide dismutase 2, mitochondrial // 1q21 // 24787	NM_017051 // RefSeq // Rattus norvegicus superoxide dismutase 2, mitochondrial (Sod2), nuclear gene encoding mitochondrial protein, mRNA. // chr1 // 100 // 100 // 24 // 24 // 0 /// ENSRNOT00000025794 // ENSEMBL // Superoxide dismutase [Mn], mitochondrial gene:ENSRNOG00000019048 // chr1 // 100 // 100 // 24 // 24 // 0 /// BC070913 // GenBank // Rattus norvegicus superoxide dismutase 2, mitochondria…	NM_017051 // GO:0000302 // response to reactive oxygen species // not recorded /// NM_017051 // GO:0000303 // response to superoxide // inferred from electronic annotation /// NM_017051 // GO:0000303 // response to superoxide // not recorded /// NM_017051 // GO:0001306 // age-dependent response to oxidative stress // not recorded /// NM_017051 // GO:0001315 // age-dependent response to reactive o…	NM_017051 // GO:0005625 // soluble fraction // inferred from direct assay /// NM_017051 // GO:0005737 // cytoplasm // inferred from direct assay /// NM_017051 // GO:0005739 // mitochondrion // inferred from direct assay /// NM_017051 // GO:0005739 // mitochondrion // not recorded /// NM_017051 // GO:0005739 // mitochondrion // non-traceable author statement /// NM_017051 // GO:0005743 // mitochon…	NM_017051 // GO:0003677 // DNA binding // inferred from direct assay /// NM_017051 // GO:0004784 // superoxide dismutase activity // inferred from direct assay /// NM_017051 // GO:0004784 // superoxide dismutase activity // not recorded /// NM_017051 // GO:0004784 // superoxide dismutase activity // inferred from sequence or structural similarity /// NM_017051 // GO:0005515 // protein binding // …	NM_017051 // GenMAPP // Oxidative_Stress /// BC070913 // GenMAPP // Oxidative_Stress					1.51224			1.51224			1.51224					1.51224			1.51224	1.51224
Tfb2m	transcription factor B2, mitochondrial (Tfb2m), nuclear gene encoding mitochondrial protein, mRNA.	3.62707	-2.1		3.62707			NM_001008293	---	---	NM_001008293 // Tfb2m // transcription factor B2, mitochondrial // 13q26 // 289307 /// ENSRNOT00000003618 // Tfb2m // transcription factor B2, mitochondrial // 13q26 // 289307 /// BC085870 // Tfb2m // transcription factor B2, mitochondrial // 13q26 // 289307	NM_001008293 // RefSeq // Rattus norvegicus transcription factor B2, mitochondrial (Tfb2m), nuclear gene encoding mitochondrial protein, mRNA. // chr13 // 100 // 100 // 32 // 32 // 0 /// ENSRNOT00000003618 // ENSEMBL // Dimethyladenosine transferase 2, mitochondrial gene:ENSRNOG00000002695 // chr13 // 100 // 100 // 32 // 32 // 0 /// BC085870 // GenBank // Rattus norvegicus transcription factor B2…	NM_001008293 // GO:0006355 // regulation of transcription, DNA-dependent // inferred from electronic annotation /// NM_001008293 // GO:0006390 // transcription from mitochondrial promoter // inferred from electronic annotation /// NM_001008293 // GO:0006390 // transcription from mitochondrial promoter // not recorded /// ENSRNOT00000003618 // GO:0006355 // regulation of transcription, DNA-depende…	NM_001008293 // GO:0005739 // mitochondrion // inferred from electronic annotation /// NM_001008293 // GO:0005739 // mitochondrion // not recorded /// NM_001008293 // GO:0005759 // mitochondrial matrix // not recorded /// NM_001008293 // GO:0042645 // mitochondrial nucleoid // inferred from electronic annotation /// NM_001008293 // GO:0042645 // mitochondrial nucleoid // not recorded /// ENSRNOT0…	NM_001008293 // GO:0000179 // rRNA (adenine-N6,N6-)-dimethyltransferase activity // inferred from electronic annotation /// NM_001008293 // GO:0003712 // transcription cofactor activity // inferred from electronic annotation /// NM_001008293 // GO:0003712 // transcription cofactor activity // not recorded /// NM_001008293 // GO:0005515 // protein binding // inferred from electronic annotation ///…	---
Pxmp2	peroxisomal membrane protein 2 (Pxmp2), mRNA.	3.95226	-2.09403	1.88739	3.95226	-2.09403	1.88739	NM_031587	---	---	NM_031587 // Pxmp2 // peroxisomal membrane protein 2 // 12q16 // 29533 /// ENSRNOT00000056680 // Pxmp2 // peroxisomal membrane protein 2 // 12q16 // 29533 /// ENSRNOT00000056679 // Pxmp2 // peroxisomal membrane protein 2 // 12q16 // 29533	NM_031587 // RefSeq // Rattus norvegicus peroxisomal membrane protein 2 (Pxmp2), mRNA. // chr12 // 96 // 100 // 25 // 26 // 0 /// ENSRNOT00000056680 // ENSEMBL // Peroxisomal membrane protein 2 gene:ENSRNOG00000037446 // chr12 // 100 // 100 // 26 // 26 // 0 /// ENSRNOT00000056679 // ENSEMBL // Liver regeneration-related protein LRRG01 gene:ENSRNOG00000037446 // chr12 // 100 // 77 // 20 // 20 // 0	---	NM_031587 // GO:0005739 // mitochondrion // inferred from electronic annotation /// NM_031587 // GO:0005739 // mitochondrion // not recorded /// NM_031587 // GO:0005777 // peroxisome // inferred from electronic annotation /// NM_031587 // GO:0005778 // peroxisomal membrane // inferred from direct assay /// NM_031587 // GO:0005779 // integral to peroxisomal membrane // traceable author statement /…	NM_031587 // GO:0005515 // protein binding // not recorded /// ENSRNOT00000056680 // GO:0005515 // protein binding // not recorded /// ENSRNOT00000056679 // GO:0005515 // protein binding // not recorded	---	2.4418					-1.51727		-1.51727			-1.51727					-1.51727			-1.51727	0.462265
Unc50	unc-50 homolog (C. elegans) (Unc50), mRNA.	2.48161	-2.09106		2.48161	-2.09106		NM_138919	---	---	NM_138919 // Unc50 // unc-50 homolog (C. elegans) // 9q21 // 192356 /// ENSRNOT00000024582 // Unc50 // unc-50 homolog (C. elegans) // 9q21 // 192356 /// AY017209 // Unc50 // unc-50 homolog (C. elegans) // 9q21 // 192356	NM_138919 // RefSeq // Rattus norvegicus unc-50 homolog (C. elegans) (Unc50), mRNA. // chr9 // 93 // 100 // 26 // 28 // 0 /// ENSRNOT00000024582 // ENSEMBL // Protein unc-50 homolog gene:ENSRNOG00000018128 // chr9 // 100 // 100 // 28 // 28 // 0 /// AY017209 // GenBank // Rattus norvegicus UNC50 (Unc50) mRNA, complete cds. // chr9 // 93 // 100 // 26 // 28 // 0	NM_138919 // GO:0007166 // cell surface receptor linked signaling pathway // inferred from mutant phenotype /// NM_138919 // GO:0015031 // protein transport // inferred from electronic annotation /// ENSRNOT00000024582 // GO:0007166 // cell surface receptor linked signaling pathway // inferred from mutant phenotype /// ENSRNOT00000024582 // GO:0015031 // protein transport // inferred from electro…	NM_138919 // GO:0000139 // Golgi membrane // inferred from direct assay /// NM_138919 // GO:0005634 // nucleus // inferred from electronic annotation /// NM_138919 // GO:0005637 // nuclear inner membrane // inferred from direct assay /// NM_138919 // GO:0005794 // Golgi apparatus // inferred from electronic annotation /// NM_138919 // GO:0005794 // Golgi apparatus // not recorded /// NM_138919 //…	NM_138919 // GO:0003723 // RNA binding // inferred from direct assay /// NM_138919 // GO:0003723 // RNA binding // inferred from mutant phenotype /// ENSRNOT00000024582 // GO:0003723 // RNA binding // inferred from direct assay /// ENSRNOT00000024582 // GO:0003723 // RNA binding // inferred from mutant phenotype /// AY017209 // GO:0003723 // RNA binding // inferred from direct assay /// AY017209 …	---													1.80271		2.01124					1.90698
Yif1	Yip1 interacting factor homolog (S. cerevisiae) (Yif1), mRNA.	1.9	-2.08734			-2.08734		NM_172017	---	---	NM_172017 // Yif1 // Yip1 interacting factor homolog (S. cerevisiae) // 1q43 // 171441 /// ENSRNOT00000027406 // Yif1 // Yip1 interacting factor homolog (S. cerevisiae) // 1q43 // 171441 /// BC158578 // Yif1 // Yip1 interacting factor homolog (S. cerevisiae) // 1q43 // 171441	NM_172017 // RefSeq // Rattus norvegicus Yip1 interacting factor homolog (S. cerevisiae) (Yif1), mRNA. // chr1 // 100 // 100 // 27 // 27 // 0 /// ENSRNOT00000027406 // ENSEMBL // Yip1p-interacting factor gene:ENSRNOG00000020201 // chr1 // 100 // 100 // 27 // 27 // 0 /// BC158578 // GenBank // Rattus norvegicus Yip1 interacting factor homolog (S. cerevisiae), mRNA (cDNA clone MGC:187324 IMAGE:7387…	---	---	---	---
Ecsit	ECSIT homolog (Drosophila) (Ecsit), mRNA.	4.12978	-2.08723	1.9786	4.12978	-2.08723	1.9786	NM_001006986	---	---	NM_001006986 // Ecsit // ECSIT homolog (Drosophila) // 8q13 // 300447 /// ENSRNOT00000019115 // Ecsit // ECSIT homolog (Drosophila) // 8q13 // 300447 /// BC083762 // Ecsit // ECSIT homolog (Drosophila) // 8q13 // 300447	NM_001006986 // RefSeq // Rattus norvegicus ECSIT homolog (Drosophila) (Ecsit), nuclear gene encoding mitochondrial protein, mRNA. // chr8 // 100 // 100 // 28 // 28 // 0 /// ENSRNOT00000019115 // ENSEMBL // Evolutionarily conserved signaling intermediate in Toll pathway, mitochondrial gene:ENSRNOG00000014128 // chr8 // 100 // 100 // 28 // 28 // 0 /// BC083762 // GenBank // Rattus norvegicus ECSIT…	NM_001006986 // GO:0001707 // mesoderm formation // inferred from electronic annotation /// NM_001006986 // GO:0001707 // mesoderm formation // not recorded /// NM_001006986 // GO:0006357 // regulation of transcription from RNA polymerase II promoter // inferred from electronic annotation /// NM_001006986 // GO:0006357 // regulation of transcription from RNA polymerase II promoter // not recorded…	NM_001006986 // GO:0005634 // nucleus // not recorded /// NM_001006986 // GO:0005634 // nucleus // inferred from sequence or structural similarity /// NM_001006986 // GO:0005667 // transcription factor complex // inferred from electronic annotation /// NM_001006986 // GO:0005667 // transcription factor complex // not recorded /// NM_001006986 // GO:0005737 // cytoplasm // not recorded /// NM_0010…	NM_001006986 // GO:0003700 // sequence-specific DNA binding transcription factor activity // inferred from electronic annotation /// NM_001006986 // GO:0003700 // sequence-specific DNA binding transcription factor activity // not recorded /// NM_001006986 // GO:0003702 // RNA polymerase II transcription factor activity // inferred from electronic annotation /// NM_001006986 // GO:0003702 // RNA p…	---
Ptp4a1	protein tyrosine phosphatase 4a1 (Ptp4a1), mRNA.	2.36524	-2.08619		2.36524	-2.08619		NM_031579	---	---	NM_031579 // Ptp4a1 // protein tyrosine phosphatase 4a1 // 9q21 // 29463 /// L27843 // Ptp4a1 // protein tyrosine phosphatase 4a1 // 9q21 // 29463	NM_031579 // RefSeq // Rattus norvegicus protein tyrosine phosphatase 4a1 (Ptp4a1), mRNA. // chr9 // 100 // 98 // 55 // 55 // 0 /// L27843 // GenBank // Rattus norvegicus tyrosine phosphatase (PRL-1) mRNA, complete cds. // chr9 // 98 // 100 // 55 // 56 // 0 /// ENSRNOT00000016237 // ENSEMBL // cdna:known chromosome:RGSC3.4:9:29617637:29625197:-1 gene:ENSRNOG00000011771 // chr9 // 100 // 98 // 55 …	NM_031579 // GO:0006470 // protein dephosphorylation // inferred from electronic annotation /// NM_031579 // GO:0007049 // cell cycle // inferred from electronic annotation /// NM_031579 // GO:0007275 // multicellular organismal development // inferred from electronic annotation /// NM_031579 // GO:0030335 // positive regulation of cell migration // inferred from electronic annotation /// L27843 …	NM_031579 // GO:0005634 // nucleus // inferred from direct assay /// NM_031579 // GO:0005737 // cytoplasm // inferred from electronic annotation /// NM_031579 // GO:0005769 // early endosome // inferred from electronic annotation /// NM_031579 // GO:0005783 // endoplasmic reticulum // inferred from electronic annotation /// NM_031579 // GO:0005819 // spindle // inferred from electronic annotation…	NM_031579 // GO:0004725 // protein tyrosine phosphatase activity // inferred from direct assay /// NM_031579 // GO:0005515 // protein binding // not recorded /// NM_031579 // GO:0016787 // hydrolase activity // inferred from electronic annotation /// L27843 // GO:0004725 // protein tyrosine phosphatase activity // inferred from direct assay /// L27843 // GO:0005515 // protein binding // not recor…	---						-1.55969		-1.55969			-1.55969				1.80444	0.122375			0.963407	0.122375
Apool	apolipoprotein O-like (Apool), mRNA.	4.27082	-2.08586	2.04751	4.27082	-2.08586	2.04751	NM_001014105	---	---	NM_001014105 // Apool // apolipoprotein O-like // Xq31 // 317191 /// ENSRNOT00000057366 // Apool // apolipoprotein O-like // Xq31 // 317191 /// BC086434 // Apool // apolipoprotein O-like // Xq31 // 317191 /// ENSRNOT00000064539 // Apool // apolipoprotein O-like // Xq31 // 317191 /// ENSRNOT00000005997 // Apool // apolipoprotein O-like // Xq31 // 317191	NM_001014105 // RefSeq // Rattus norvegicus apolipoprotein O-like (Apool), mRNA. // chrX // 100 // 100 // 23 // 23 // 0 /// ENSRNOT00000057366 // ENSEMBL // Apolipoprotein O-like gene:ENSRNOG00000004512 // chrX // 100 // 100 // 23 // 23 // 0 /// BC086434 // GenBank // Rattus norvegicus apolipoprotein O-like, mRNA (cDNA clone MGC:105970 IMAGE:7302620), complete cds. // chrX // 100 // 100 // 23 // …	---	NM_001014105 // GO:0005739 // mitochondrion // inferred from electronic annotation /// NM_001014105 // GO:0005739 // mitochondrion // not recorded /// NM_001014105 // GO:0005743 // mitochondrial inner membrane // inferred from electronic annotation /// NM_001014105 // GO:0005743 // mitochondrial inner membrane // not recorded /// ENSRNOT00000057366 // GO:0005739 // mitochondrion // inferred from …	---	---			3.26089		1.78043	2.56764	3.3053	2.72856			2.59548				1.57253	2.08401			1.82827	2.49736
Atp6v1e1	ATPase, H+ transporting, lysosomal V1 subunit E1 (Atp6v1e1), mRNA.	2.60474	-2.07832		2.60474	-2.07832		NM_198745	---	---	NM_198745 // Atp6v1e1 // ATPase, H+ transporting, lysosomal V1 subunit E1 // 4q42 // 297566 /// ENSRNOT00000016495 // Atp6v1e1 // ATPase, H+ transporting, lysosomal V1 subunit E1 // 4q42 // 297566 /// BC059155 // Atp6v1e1 // ATPase, H+ transporting, lysosomal V1 subunit E1 // 4q42 // 297566	NM_198745 // RefSeq // Rattus norvegicus ATPase, H+ transporting, lysosomal V1 subunit E1 (Atp6v1e1), mRNA. // chr4 // 93 // 100 // 25 // 27 // 0 /// ENSRNOT00000016495 // ENSEMBL // V-type proton ATPase subunit E 1 gene:ENSRNOG00000011905 // chr4 // 100 // 100 // 27 // 27 // 0 /// BC059155 // GenBank // Rattus norvegicus ATPase, H+ transporting, lysosomal V1 subunit E1, mRNA (cDNA clone MGC:7293…	NM_198745 // GO:0006200 // ATP catabolic process // not recorded /// NM_198745 // GO:0006811 // ion transport // inferred from electronic annotation /// NM_198745 // GO:0015986 // ATP synthesis coupled proton transport // inferred from electronic annotation /// NM_198745 // GO:0015991 // ATP hydrolysis coupled proton transport // inferred from electronic annotation /// NM_198745 // GO:0015991 // …	NM_198745 // GO:0005737 // cytoplasm // inferred from electronic annotation /// NM_198745 // GO:0005737 // cytoplasm // not recorded /// NM_198745 // GO:0005739 // mitochondrion // inferred from electronic annotation /// NM_198745 // GO:0005739 // mitochondrion // not recorded /// NM_198745 // GO:0005768 // endosome // not recorded /// NM_198745 // GO:0005768 // endosome // inferred from sequence…	NM_198745 // GO:0005515 // protein binding // inferred from electronic annotation /// NM_198745 // GO:0005515 // protein binding // not recorded /// NM_198745 // GO:0008553 // hydrogen-exporting ATPase activity, phosphorylative mechanism // inferred from electronic annotation /// NM_198745 // GO:0008553 // hydrogen-exporting ATPase activity, phosphorylative mechanism // not recorded /// NM_198745…	---
Phb	prohibitin (Phb), mRNA.	2.79336	-2.07499		2.79336	-2.07499		NM_031851	---	---	NM_031851 // Phb // prohibitin // Xq14 // 25344 /// M61219 // Phb // prohibitin // Xq14 // 25344	NM_031851 // RefSeq // Rattus norvegicus prohibitin (Phb), mRNA. // chr19 // 85 // 80 // 17 // 20 // 0 /// M61219 // GenBank // Rat prohibitin (phb) mRNA, complete cds. // chr19 // 85 // 80 // 17 // 20 // 0 /// ENSRNOT00000061542 // ENSEMBL // cdna:known chromosome:RGSC3.4:19:9122916:9123847:1 gene:ENSRNOG00000040030 // chr19 // 100 // 100 // 25 // 25 // 0 /// ENSRNOT00000029968 // ENSEMBL // cdn…	NM_031851 // GO:0001541 // ovarian follicle development // inferred from expression pattern /// NM_031851 // GO:0001552 // ovarian follicle atresia // inferred from expression pattern /// NM_031851 // GO:0006260 // DNA replication // inferred from electronic annotation /// NM_031851 // GO:0006950 // response to stress // inferred from expression pattern /// NM_031851 // GO:0008285 // negative reg…	NM_031851 // GO:0005634 // nucleus // inferred from direct assay /// NM_031851 // GO:0005654 // nucleoplasm // not recorded /// NM_031851 // GO:0005737 // cytoplasm // inferred from direct assay /// NM_031851 // GO:0005739 // mitochondrion // inferred from direct assay /// NM_031851 // GO:0005739 // mitochondrion // not recorded /// NM_031851 // GO:0005743 // mitochondrial inner membrane // not r…	NM_031851 // GO:0003674 // molecular_function // no biological data available /// NM_031851 // GO:0005515 // protein binding // not recorded /// NM_031851 // GO:0016563 // transcription activator activity // not recorded /// NM_031851 // GO:0016564 // transcription repressor activity // not recorded /// M61219 // GO:0003674 // molecular_function // no biological data available /// M61219 // GO:00…	---	3.65236					-1.60876		-1.60876			-1.60876					-1.60876			-1.60876	1.0218
Polr3k	polymerase (RNA) III (DNA directed) polypeptide K, 12.3 kDa (Polr3k), mRNA.	2.15974	-2.06941			-2.06941		NM_001014259	---	---	NM_001014259 // Polr3k // polymerase (RNA) III (DNA directed) polypeptide K // 3q43 // 366277 /// ENSRNOT00000024096 // Polr3k // polymerase (RNA) III (DNA directed) polypeptide K // 3q43 // 366277 /// BC089990 // Polr3k // polymerase (RNA) III (DNA directed) polypeptide K // 3q43 // 366277	NM_001014259 // RefSeq // Rattus norvegicus polymerase (RNA) III (DNA directed) polypeptide K (Polr3k), mRNA. // chr3 // 100 // 76 // 25 // 25 // 0 /// ENSRNOT00000024096 // ENSEMBL // DNA-directed RNA polymerase subunit gene:ENSRNOG00000017843 // chr3 // 100 // 39 // 13 // 13 // 0 /// BC089990 // GenBank // Rattus norvegicus polymerase (RNA) III (DNA directed) polypeptide K, 12.3 kDa, mRNA (cDNA…	---	NM_001014259 // GO:0005634 // nucleus // not recorded /// NM_001014259 // GO:0005737 // cytoplasm // not recorded /// ENSRNOT00000024096 // GO:0005634 // nucleus // not recorded /// ENSRNOT00000024096 // GO:0005737 // cytoplasm // not recorded /// BC089990 // GO:0005634 // nucleus // not recorded /// BC089990 // GO:0005737 // cytoplasm // not recorded	---	---
Cops5	COP9 constitutive photomorphogenic homolog subunit 5 (Arabidopsis) (Cops5), mRNA.	2.48278	-2.06509		2.48278	-2.06509		NM_001025695	---	---	NM_001025695 // Cops5 // COP9 constitutive photomorphogenic homolog subunit 5 (Arabidopsis) // 5q11 // 312916 /// ENSRNOT00000008877 // Cops5 // COP9 constitutive photomorphogenic homolog subunit 5 (Arabidopsis) // 5q11 // 312916 /// BC098736 // Cops5 // COP9 constitutive photomorphogenic homolog subunit 5 (Arabidopsis) // 5q11 // 312916	NM_001025695 // RefSeq // Rattus norvegicus COP9 constitutive photomorphogenic homolog subunit 5 (Arabidopsis) (Cops5), mRNA. // chr5 // 100 // 100 // 30 // 30 // 0 /// ENSRNOT00000008877 // ENSEMBL // COP9 constitutive photomorphogenic homolog subunit 5 gene:ENSRNOG00000006499 // chr5 // 100 // 100 // 30 // 30 // 0 /// BC098736 // GenBank // Rattus norvegicus COP9 constitutive photomorphogenic h…	NM_001025695 // GO:0000338 // protein deneddylation // inferred from electronic annotation /// NM_001025695 // GO:0000338 // protein deneddylation // not recorded /// NM_001025695 // GO:0051726 // regulation of cell cycle // inferred from electronic annotation /// NM_001025695 // GO:0051726 // regulation of cell cycle // not recorded /// ENSRNOT00000008877 // GO:0000338 // protein deneddylation /…	NM_001025695 // GO:0005634 // nucleus // inferred from electronic annotation /// NM_001025695 // GO:0005634 // nucleus // not recorded /// NM_001025695 // GO:0005730 // nucleolus // not recorded /// NM_001025695 // GO:0005737 // cytoplasm // inferred from electronic annotation /// NM_001025695 // GO:0005737 // cytoplasm // not recorded /// NM_001025695 // GO:0008180 // signalosome // inferred fro…	NM_001025695 // GO:0005515 // protein binding // inferred from electronic annotation /// NM_001025695 // GO:0005515 // protein binding // not recorded /// NM_001025695 // GO:0008237 // metallopeptidase activity // inferred from electronic annotation /// NM_001025695 // GO:0008237 // metallopeptidase activity // not recorded /// ENSRNOT00000008877 // GO:0005515 // protein binding // inferred from …	---	2.51419					-1.61323		-1.61323		-2.05025	-1.7589					-1.90458			-1.90458	-0.383097
Fbxo40	similar to F-box only protein 40 gene:ENSRNOG00000002459	1.67534	-2.06482			-2.06482		ENSRNOT00000003340	---	---	ENSRNOT00000003340 // Fbxo40 // F-box protein 40 // 11q22 // 363790	ENSRNOT00000003340 // ENSEMBL // F-box protein 40 gene:ENSRNOG00000002459 // chr11 // 100 // 100 // 26 // 26 // 0 /// FQ223618 // GenBank // Rattus norvegicus TL0ACA91YC22 mRNA sequence. // chr11 // 100 // 100 // 26 // 26 // 0	---	---	ENSRNOT00000003340 // GO:0004842 // ubiquitin-protein ligase activity // inferred from electronic annotation /// ENSRNOT00000003340 // GO:0008270 // zinc ion binding // inferred from electronic annotation	---		1.8816	1.7146	1.97464	1.68831		1.70887	1.7936			1.73026	1.91289	2.41853			2.02056			2.21955	1.89992
Banf1	barrier to autointegration factor 1 (Banf1), mRNA.	2.447	-2.05729		2.447	-2.05729		NM_053631	---	---	NM_053631 // Banf1 // barrier to autointegration factor 1 // 1q43 // 114087 /// ENSRNOT00000027734 // Banf1 // barrier to autointegration factor 1 // 1q43 // 114087 /// BC084726 // Banf1 // barrier to autointegration factor 1 // 1q43 // 114087	NM_053631 // RefSeq // Rattus norvegicus barrier to autointegration factor 1 (Banf1), mRNA. // chr1 // 100 // 100 // 11 // 11 // 0 /// ENSRNOT00000027734 // ENSEMBL // Barrier-to-autointegration factor gene:ENSRNOG00000020460 // chr1 // 100 // 100 // 11 // 11 // 0 /// BC084726 // GenBank // Rattus norvegicus barrier to autointegration factor 1, mRNA (cDNA clone MGC:105365 IMAGE:7320690), complete…	NM_053631 // GO:0015074 // DNA integration // inferred from electronic annotation /// NM_053631 // GO:0015074 // DNA integration // not recorded /// NM_053631 // GO:0019047 // provirus integration // not recorded /// NM_053631 // GO:0019059 // initiation of viral infection // not recorded /// NM_053631 // GO:0050792 // regulation of viral reproduction // traceable author statement /// ENSRNOT0000…	NM_053631 // GO:0005634 // nucleus // inferred from electronic annotation /// NM_053631 // GO:0005737 // cytoplasm // inferred from electronic annotation /// NM_053631 // GO:0005829 // cytosol // not recorded /// ENSRNOT00000027734 // GO:0005634 // nucleus // inferred from electronic annotation /// ENSRNOT00000027734 // GO:0005737 // cytoplasm // inferred from electronic annotation /// ENSRNOT000…	NM_053631 // GO:0003677 // DNA binding // inferred from electronic annotation /// NM_053631 // GO:0003677 // DNA binding // not recorded /// ENSRNOT00000027734 // GO:0003677 // DNA binding // inferred from electronic annotation /// ENSRNOT00000027734 // GO:0003677 // DNA binding // not recorded /// BC084726 // GO:0003677 // DNA binding // inferred from electronic annotation /// BC084726 // GO:000…	---	2.85263																			2.85263
Mocs2	molybdenum cofactor synthesis 2 (Mocs2), transcript variant 1, mRNA.	3.55253	-2.05649		3.55253	-2.05649		NM_001162413	---	---	NM_001162413 // Mocs2 // molybdenum cofactor synthesis 2 // 2q14 // 294753 /// NM_001007633 // Mocs2 // molybdenum cofactor synthesis 2 // 2q14 // 294753 /// ENSRNOT00000015781 // Mocs2 // molybdenum cofactor synthesis 2 // 2q14 // 294753 /// BC079181 // Mocs2 // molybdenum cofactor synthesis 2 // 2q14 // 294753 /// ENSRNOT00000065377 // Mocs2 // molybdenum cofactor synthesis 2 // 2q14 // 294753	NM_001162413 // RefSeq // Rattus norvegicus molybdenum cofactor synthesis 2 (Mocs2), transcript variant 1, mRNA. // chr2 // 100 // 100 // 27 // 27 // 0 /// NM_001007633 // RefSeq // Rattus norvegicus molybdenum cofactor synthesis 2 (Mocs2), transcript variant 2, mRNA. // chr2 // 100 // 85 // 23 // 23 // 0 /// ENSRNOT00000015781 // ENSEMBL // Molybdopterin synthase catalytic subunit gene:ENSRNOG00…	NM_001162413 // GO:0006777 // Mo-molybdopterin cofactor biosynthetic process // inferred from electronic annotation /// NM_001162413 // GO:0006777 // Mo-molybdopterin cofactor biosynthetic process // not recorded /// NM_001162413 // GO:0006777 // Mo-molybdopterin cofactor biosynthetic process // inferred from sequence or structural similarity /// NM_001162413 // GO:0006790 // sulfur compound meta…	NM_001162413 // GO:0005575 // cellular_component // no biological data available /// NM_001162413 // GO:0005737 // cytoplasm // inferred from electronic annotation /// NM_001162413 // GO:0005829 // cytosol // not recorded /// NM_001162413 // GO:0005829 // cytosol // inferred from sequence or structural similarity /// NM_001162413 // GO:0019008 // molybdopterin synthase complex // inferred from el…	NM_001162413 // GO:0003674 // molecular_function // no biological data available /// NM_001162413 // GO:0016740 // transferase activity // inferred from electronic annotation /// NM_001162413 // GO:0030366 // Mo-molybdopterin synthase activity // not recorded /// NM_001162413 // GO:0030366 // Mo-molybdopterin synthase activity // inferred from sequence or structural similarity /// NM_001162413 //…	---															1.90938					1.90938
Ivd	isovaleryl coenzyme A dehydrogenase (Ivd), nuclear gene encoding mitochondrial protein, mRNA.	2.10877	-2.05425		2.10877	-2.05425		NM_012592	---	---	NM_012592 // Ivd // isovaleryl coenzyme A dehydrogenase // 3q35 // 24513 /// ENSRNOT00000013829 // Ivd // isovaleryl coenzyme A dehydrogenase // 3q35 // 24513 /// J05031 // Ivd // isovaleryl coenzyme A dehydrogenase // 3q35 // 24513	NM_012592 // RefSeq // Rattus norvegicus isovaleryl coenzyme A dehydrogenase (Ivd), nuclear gene encoding mitochondrial protein, mRNA. // chr3 // 100 // 96 // 24 // 24 // 0 /// ENSRNOT00000013829 // ENSEMBL // Isovaleryl-CoA dehydrogenase, mitochondrial gene:ENSRNOG00000009421 // chr3 // 100 // 100 // 25 // 25 // 0 /// J05031 // GenBank // Rat isovaleryl-CoA dehydrogenase (IVD) mRNA, complete cds…	NM_012592 // GO:0006551 // leucine metabolic process // traceable author statement /// NM_012592 // GO:0006552 // leucine catabolic process // inferred from direct assay /// NM_012592 // GO:0033539 // fatty acid beta-oxidation using acyl-CoA dehydrogenase // inferred by curator /// NM_012592 // GO:0051260 // protein homooligomerization // traceable author statement /// NM_012592 // GO:0055114 // …	NM_012592 // GO:0005739 // mitochondrion // inferred from electronic annotation /// NM_012592 // GO:0005739 // mitochondrion // not recorded /// NM_012592 // GO:0005759 // mitochondrial matrix // inferred from direct assay /// NM_012592 // GO:0031966 // mitochondrial membrane // inferred from direct assay /// ENSRNOT00000013829 // GO:0005739 // mitochondrion // inferred from electronic annotation…	NM_012592 // GO:0008470 // isovaleryl-CoA dehydrogenase activity // inferred from direct assay /// NM_012592 // GO:0050660 // FAD or FADH2 binding // inferred from electronic annotation /// ENSRNOT00000013829 // GO:0008470 // isovaleryl-CoA dehydrogenase activity // inferred from direct assay /// ENSRNOT00000013829 // GO:0050660 // FAD or FADH2 binding // inferred from electronic annotation /// J…	---		1.51387					1.55473	1.5343			1.54452					1.54452			1.54452	1.5343
Macrod1	MACRO domain containing 1 (Macrod1), mRNA.	2.61819	-2.05227		2.61819	-2.05227		NM_139337	---	---	NM_139337 // Macrod1 // MACRO domain containing 1 // 1q43 // 246233 /// ENSRNOT00000028749 // Macrod1 // MACRO domain containing 1 // 1q43 // 246233 /// AF404762 // Macrod1 // MACRO domain containing 1 // 1q43 // 246233	NM_139337 // RefSeq // Rattus norvegicus MACRO domain containing 1 (Macrod1), mRNA. // chr1 // 100 // 97 // 31 // 31 // 0 /// ENSRNOT00000028749 // ENSEMBL // MACRO domain-containing protein 1 gene:ENSRNOG00000021174 // chr1 // 100 // 100 // 32 // 32 // 0 /// AF404762 // GenBank // Rattus norvegicus LRP16-like protein mRNA, complete cds. // chr1 // 100 // 97 // 31 // 31 // 0	---	NM_139337 // GO:0005739 // mitochondrion // inferred from electronic annotation /// NM_139337 // GO:0005739 // mitochondrion // not recorded /// ENSRNOT00000028749 // GO:0005739 // mitochondrion // inferred from electronic annotation /// ENSRNOT00000028749 // GO:0005739 // mitochondrion // not recorded /// AF404762 // GO:0005739 // mitochondrion // inferred from electronic annotation /// AF404762…	---	---
Fam96b	family with sequence similarity 96, member B (Fam96b), mRNA.	1.6	-2.05206			-2.05206		NM_001144854	---	---	NM_001144854 // Fam96b // family with sequence similarity 96, member B // 19p14 // 680987 /// ENSRNOT00000015811 // Fam96b // family with sequence similarity 96, member B // 19p14 // 680987	NM_001144854 // RefSeq // Rattus norvegicus family with sequence similarity 96, member B (Fam96b), mRNA. // chr19 // 100 // 100 // 27 // 27 // 0 /// ENSRNOT00000015811 // ENSEMBL // Uncharacterized protein gene:ENSRNOG00000011865 // chr19 // 100 // 100 // 27 // 27 // 0	NM_001144854 // GO:0008150 // biological_process // no biological data available /// ENSRNOT00000015811 // GO:0008150 // biological_process // no biological data available	NM_001144854 // GO:0005575 // cellular_component // no biological data available /// ENSRNOT00000015811 // GO:0005575 // cellular_component // no biological data available	NM_001144854 // GO:0003674 // molecular_function // no biological data available /// NM_001144854 // GO:0005515 // protein binding // not recorded /// ENSRNOT00000015811 // GO:0003674 // molecular_function // no biological data available /// ENSRNOT00000015811 // GO:0005515 // protein binding // not recorded	---						-1.58375		-1.58375			-1.58375					-1.58375			-1.58375	-1.58375
Selk	selenoprotein K (Selk), mRNA.	2.52067	-2.05088		2.52067	-2.05088		NM_207589	---	---	NM_207589 // Selk // selenoprotein K // 16p16 // 290549 /// ENSRNOT00000020284 // Selk // selenoprotein K // 16p16 // 290549 /// BC088086 // Selk // selenoprotein K // 16p16 // 290549	NM_207589 // RefSeq // Rattus norvegicus selenoprotein K (Selk), mRNA. // chr16 // 100 // 100 // 12 // 12 // 0 /// ENSRNOT00000020284 // ENSEMBL // Selenoprotein K gene:ENSRNOG00000014624 // chr16 // 100 // 100 // 12 // 12 // 0 /// BC088086 // GenBank // Rattus norvegicus selenoprotein K, mRNA (cDNA clone MGC:108512 IMAGE:7326199), complete cds. // chr16 // 100 // 92 // 11 // 11 // 0	NM_207589 // GO:0006979 // response to oxidative stress // not recorded /// ENSRNOT00000020284 // GO:0006979 // response to oxidative stress // not recorded /// BC088086 // GO:0006979 // response to oxidative stress // not recorded	NM_207589 // GO:0005783 // endoplasmic reticulum // not recorded /// ENSRNOT00000020284 // GO:0005783 // endoplasmic reticulum // not recorded /// BC088086 // GO:0005783 // endoplasmic reticulum // not recorded	---	---						-1.52765		-1.52765			-1.52765					-1.52765			-1.52765	-1.52765
Mrpl3	mitochondrial ribosomal protein L3 (Mrpl3), nuclear gene encoding mitochondrial protein, mRNA.	2.7728	-2.0502		2.7728	-2.0502		NM_001106852	---	---	NM_001106852 // Mrpl3 // mitochondrial ribosomal protein L3 // 8q32 // 300974 /// ENSRNOT00000017280 // Mrpl3 // mitochondrial ribosomal protein L3 // 8q32 // 300974	NM_001106852 // RefSeq // Rattus norvegicus mitochondrial ribosomal protein L3 (Mrpl3), nuclear gene encoding mitochondrial protein, mRNA. // chr8 // 100 // 83 // 30 // 30 // 0 /// ENSRNOT00000017280 // ENSEMBL // mitochondrial ribosomal protein L3 gene:ENSRNOG00000012650 // chr8 // 100 // 83 // 30 // 30 // 0	NM_001106852 // GO:0006412 // translation // inferred from electronic annotation /// ENSRNOT00000017280 // GO:0006412 // translation // inferred from electronic annotation	NM_001106852 // GO:0005622 // intracellular // inferred from electronic annotation /// NM_001106852 // GO:0005739 // mitochondrion // inferred from electronic annotation /// NM_001106852 // GO:0005739 // mitochondrion // not recorded /// NM_001106852 // GO:0005762 // mitochondrial large ribosomal subunit // not recorded /// NM_001106852 // GO:0005762 // mitochondrial large ribosomal subunit // in…	NM_001106852 // GO:0003735 // structural constituent of ribosome // inferred from electronic annotation /// ENSRNOT00000017280 // GO:0003735 // structural constituent of ribosome // inferred from electronic annotation	---										-1.94375					1.51765					-0.21305
Csrp3	cysteine and glycine-rich protein 3 (Csrp3), mRNA.	2.66768	-2.04785		2.66768	-2.04785		NM_057144	---	---	NM_057144 // Csrp3 // cysteine and glycine-rich protein 3 // 1q22 // 117505 /// ENSRNOT00000019311 // Csrp3 // cysteine and glycine-rich protein 3 // 1q22 // 117505	NM_057144 // RefSeq // Rattus norvegicus cysteine and glycine-rich protein 3 (Csrp3), mRNA. // chr1 // 74 // 96 // 20 // 27 // 0 /// ENSRNOT00000019311 // ENSEMBL // Cysteine and glycine-rich protein 3 gene:ENSRNOG00000014327 // chr1 // 100 // 100 // 28 // 28 // 0	NM_057144 // GO:0001974 // blood vessel remodeling // inferred from expression pattern /// NM_057144 // GO:0002026 // regulation of the force of heart contraction // inferred from electronic annotation /// NM_057144 // GO:0002026 // regulation of the force of heart contraction // not recorded /// NM_057144 // GO:0006874 // cellular calcium ion homeostasis // inferred from electronic annotation //…	NM_057144 // GO:0005634 // nucleus // inferred from direct assay /// NM_057144 // GO:0005737 // cytoplasm // inferred from direct assay /// NM_057144 // GO:0005856 // cytoskeleton // inferred from electronic annotation /// NM_057144 // GO:0030018 // Z disc // inferred from electronic annotation /// NM_057144 // GO:0030018 // Z disc // not recorded /// ENSRNOT00000019311 // GO:0005634 // nucleus /…	NM_057144 // GO:0005515 // protein binding // inferred from electronic annotation /// NM_057144 // GO:0005515 // protein binding // not recorded /// NM_057144 // GO:0008270 // zinc ion binding // inferred from electronic annotation /// NM_057144 // GO:0046872 // metal ion binding // inferred from electronic annotation /// ENSRNOT00000019311 // GO:0005515 // protein binding // inferred from electr…	---									1.56											1.56
Them4	thioesterase superfamily member 4 (Them4), mRNA.	1.82855	-2.04701		1.82855	-2.04701		NM_001025017	---	---	NM_001025017 // Them4 // thioesterase superfamily member 4 // 2q34 // 361992 /// ENSRNOT00000028260 // Them4 // thioesterase superfamily member 4 // 2q34 // 361992 /// BC093385 // Them4 // thioesterase superfamily member 4 // 2q34 // 361992	NM_001025017 // RefSeq // Rattus norvegicus thioesterase superfamily member 4 (Them4), mRNA. // chr2 // 100 // 100 // 26 // 26 // 0 /// ENSRNOT00000028260 // ENSEMBL // Thioesterase superfamily member 4 gene:ENSRNOG00000020829 // chr2 // 100 // 100 // 26 // 26 // 0 /// BC093385 // GenBank // Rattus norvegicus thioesterase superfamily member 4, mRNA (cDNA clone MGC:112681 IMAGE:7389383), complete …	---	NM_001025017 // GO:0005737 // cytoplasm // inferred from electronic annotation /// NM_001025017 // GO:0005739 // mitochondrion // not recorded /// NM_001025017 // GO:0005886 // plasma membrane // inferred from electronic annotation /// NM_001025017 // GO:0032587 // ruffle membrane // inferred from electronic annotation /// NM_001025017 // GO:0042995 // cell projection // inferred from electronic …	---	---
Ssr4	signal sequence receptor, delta (Ssr4), mRNA.	2.63164	-2.04248		2.63164	-2.04248		NM_017199	---	---	NM_017199 // Ssr4 // signal sequence receptor, delta // Xq37 // 29435 /// ENSRNOT00000064213 // Ssr4 // signal sequence receptor, delta // Xq37 // 29435 /// BC058482 // Ssr4 // signal sequence receptor, delta // Xq37 // 29435 /// ENSRNOT00000056377 // Ssr4 // signal sequence receptor, delta // Xq37 // 29435	NM_017199 // RefSeq // Rattus norvegicus signal sequence receptor, delta (Ssr4), mRNA. // chrX // 100 // 100 // 24 // 24 // 0 /// ENSRNOT00000064213 // ENSEMBL // Translocon-associated protein subunit delta gene:ENSRNOG00000037283 // chrX // 100 // 100 // 24 // 24 // 0 /// BC058482 // GenBank // Rattus norvegicus signal sequence receptor, delta, mRNA (cDNA clone MGC:72864 IMAGE:6921620), complete…	---	NM_017199 // GO:0005783 // endoplasmic reticulum // inferred from electronic annotation /// NM_017199 // GO:0005783 // endoplasmic reticulum // traceable author statement /// NM_017199 // GO:0005784 // Sec61 translocon complex // inferred from direct assay /// NM_017199 // GO:0005789 // endoplasmic reticulum membrane // inferred from electronic annotation /// NM_017199 // GO:0016020 // membrane /…	NM_017199 // GO:0005515 // protein binding // not recorded /// ENSRNOT00000064213 // GO:0005515 // protein binding // not recorded /// BC058482 // GO:0005515 // protein binding // not recorded /// ENSRNOT00000056377 // GO:0005515 // protein binding // not recorded	---															1.61521					1.61521
Tarsl2	threonyl-tRNA synthetase-like 2 (Tarsl2), mRNA.	3.00352	-2.03696		3.00352	-2.03696		NM_001014020	---	---	NM_001014020 // Tarsl2 // threonyl-tRNA synthetase-like 2 // 1q22 // 308701 /// NM_001106267 // Tm2d3 // TM2 domain containing 3 // 1q22 // 292995 /// ENSRNOT00000051000 // Tarsl2 // threonyl-tRNA synthetase-like 2 // 1q22 // 308701 /// BC083878 // Tarsl2 // threonyl-tRNA synthetase-like 2 // 1q22 // 308701 /// ENSRNOT00000033822 // Tarsl2 // threonyl-tRNA synthetase-like 2 // 1q22 // 308701	NM_001014020 // RefSeq // Rattus norvegicus threonyl-tRNA synthetase-like 2 (Tarsl2), mRNA. // chr1 // 100 // 67 // 29 // 29 // 0 /// NM_001106267 // RefSeq // Rattus norvegicus TM2 domain containing 3 (Tm2d3), mRNA. // chr1 // 100 // 2 // 1 // 1 // 0 /// ENSRNOT00000051000 // ENSEMBL // Threonyl-tRNA synthetase-like 2 gene:ENSRNOG00000024460 // chr1 // 100 // 67 // 29 // 29 // 0 /// BC083878 // …	NM_001014020 // GO:0006435 // threonyl-tRNA aminoacylation // inferred from electronic annotation /// ENSRNOT00000051000 // GO:0006435 // threonyl-tRNA aminoacylation // inferred from electronic annotation /// BC083878 // GO:0006435 // threonyl-tRNA aminoacylation // inferred from electronic annotation /// ENSRNOT00000033822 // GO:0006435 // threonyl-tRNA aminoacylation // inferred from electroni…	NM_001014020 // GO:0005737 // cytoplasm // inferred from electronic annotation /// ENSRNOT00000051000 // GO:0005737 // cytoplasm // inferred from electronic annotation /// BC083878 // GO:0005737 // cytoplasm // inferred from electronic annotation /// ENSRNOT00000033822 // GO:0005737 // cytoplasm // inferred from electronic annotation	NM_001014020 // GO:0000166 // nucleotide binding // inferred from electronic annotation /// NM_001014020 // GO:0004829 // threonine-tRNA ligase activity // inferred from electronic annotation /// NM_001014020 // GO:0005524 // ATP binding // inferred from electronic annotation /// ENSRNOT00000051000 // GO:0000166 // nucleotide binding // inferred from electronic annotation /// ENSRNOT00000051000 /…	---						-1.63119		-1.63119			-1.63119					-1.63119			-1.63119	-1.63119
Tpi1	triosephosphate isomerase 1 (Tpi1), mRNA.	2.22841	-2.03012		2.22841	-2.03012		NM_022922	---	---	NM_022922 // Tpi1 // triosephosphate isomerase 1 // 4q42 // 24849 /// ENSRNOT00000020647 // Tpi1 // triosephosphate isomerase 1 // 4q42 // 24849 /// BC126087 // Tpi1 // triosephosphate isomerase 1 // 4q42 // 24849	NM_022922 // RefSeq // Rattus norvegicus triosephosphate isomerase 1 (Tpi1), mRNA. // chr4 // 100 // 100 // 8 // 8 // 0 /// ENSRNOT00000020647 // ENSEMBL // Triosephosphate isomerase gene:ENSRNOG00000015290 // chr4 // 100 // 100 // 8 // 8 // 0 /// BC126087 // GenBank // Rattus norvegicus triosephosphate isomerase 1, mRNA (cDNA clone MGC:156639 IMAGE:8368624), complete cds. // chr4 // 100 // 100 /…	NM_022922 // GO:0005975 // carbohydrate metabolic process // inferred from direct assay /// NM_022922 // GO:0006006 // glucose metabolic process // not recorded /// NM_022922 // GO:0006094 // gluconeogenesis // inferred from electronic annotation /// NM_022922 // GO:0006096 // glycolysis // traceable author statement /// NM_022922 // GO:0006098 // pentose-phosphate shunt // inferred from electron…	NM_022922 // GO:0005625 // soluble fraction // inferred from direct assay /// NM_022922 // GO:0005634 // nucleus // inferred from direct assay /// NM_022922 // GO:0005829 // cytosol // inferred from direct assay /// ENSRNOT00000020647 // GO:0005625 // soluble fraction // inferred from direct assay /// ENSRNOT00000020647 // GO:0005634 // nucleus // inferred from direct assay /// ENSRNOT00000020647…	NM_022922 // GO:0004807 // triose-phosphate isomerase activity // inferred from direct assay /// NM_022922 // GO:0004807 // triose-phosphate isomerase activity // not recorded /// NM_022922 // GO:0005515 // protein binding // inferred from direct assay /// NM_022922 // GO:0016853 // isomerase activity // inferred from electronic annotation /// NM_022922 // GO:0016853 // isomerase activity // not …	BC126087 // GenMAPP // Fatty_Acid_Degradation /// BC126087 // GenMAPP // Glycolysis_and_Gluconeogenesis	3.18188																			3.18188
Gars	similar to glycyl-tRNA synthetase gene:ENSRNOG00000011052	2.25577	-2.02872		2.25577	-2.02872		ENSRNOT00000014780	---	---	ENSRNOT00000014780 // Gars // glycyl-tRNA synthetase // 4q24 // 297113 /// BC088347 // Gars // glycyl-tRNA synthetase // 4q24 // 297113	ENSRNOT00000014780 // ENSEMBL // glycyl-tRNA synthetase gene:ENSRNOG00000011052 // chr4 // 100 // 100 // 16 // 16 // 0 /// BC088347 // GenBank // Rattus norvegicus glycyl-tRNA synthetase, mRNA (cDNA clone IMAGE:7368341), partial cds. // chr4 // 100 // 100 // 16 // 16 // 0	ENSRNOT00000014780 // GO:0006426 // glycyl-tRNA aminoacylation // inferred from electronic annotation /// ENSRNOT00000014780 // GO:0015966 // diadenosine tetraphosphate biosynthetic process // not recorded /// ENSRNOT00000014780 // GO:0015966 // diadenosine tetraphosphate biosynthetic process // inferred from sequence or structural similarity /// ENSRNOT00000014780 // GO:0045055 // regulated secr…	ENSRNOT00000014780 // GO:0005737 // cytoplasm // inferred from electronic annotation /// ENSRNOT00000014780 // GO:0005739 // mitochondrion // inferred from electronic annotation /// ENSRNOT00000014780 // GO:0005739 // mitochondrion // not recorded /// ENSRNOT00000014780 // GO:0005759 // mitochondrial matrix // not recorded /// ENSRNOT00000014780 // GO:0005829 // cytosol // not recorded /// ENSRNO…	ENSRNOT00000014780 // GO:0000166 // nucleotide binding // inferred from electronic annotation /// ENSRNOT00000014780 // GO:0004820 // glycine-tRNA ligase activity // not recorded /// ENSRNOT00000014780 // GO:0004820 // glycine-tRNA ligase activity // inferred from sequence or structural similarity /// ENSRNOT00000014780 // GO:0005515 // protein binding // not recorded /// ENSRNOT00000014780 // GO…	---										-1.51385										-1.51385
Slc33a1	solute carrier family 33 (acetyl-CoA transporter), member 1 (Slc33a1), mRNA.	1.90324	-2.02735			-2.02735		NM_022252	---	---	NM_022252 // Slc33a1 // solute carrier family 33 (acetyl-CoA transporter), member 1 // 2q31 // 64018 /// ENSRNOT00000013392 // Slc33a1 // solute carrier family 33 (acetyl-CoA transporter), member 1 // 2q31 // 64018 /// BC078832 // Slc33a1 // solute carrier family 33 (acetyl-CoA transporter), member 1 // 2q31 // 64018	NM_022252 // RefSeq // Rattus norvegicus solute carrier family 33 (acetyl-CoA transporter), member 1 (Slc33a1), mRNA. // chr2 // 100 // 100 // 8 // 8 // 0 /// ENSRNOT00000013392 // ENSEMBL // Acetyl-coenzyme A transporter 1 gene:ENSRNOG00000010023 // chr2 // 100 // 100 // 8 // 8 // 0 /// BC078832 // GenBank // Rattus norvegicus solute carrier family 33 (acetyl-CoA transporter), member 1, mRNA (cD…	NM_022252 // GO:0006810 // transport // inferred from electronic annotation /// NM_022252 // GO:0007417 // central nervous system development // non-traceable author statement /// ENSRNOT00000013392 // GO:0006810 // transport // inferred from electronic annotation /// ENSRNOT00000013392 // GO:0007417 // central nervous system development // non-traceable author statement /// BC078832 // GO:000681…	NM_022252 // GO:0005783 // endoplasmic reticulum // inferred from electronic annotation /// NM_022252 // GO:0005789 // endoplasmic reticulum membrane // inferred from electronic annotation /// NM_022252 // GO:0016020 // membrane // inferred from electronic annotation /// NM_022252 // GO:0016021 // integral to membrane // inferred from electronic annotation /// ENSRNOT00000013392 // GO:0005783 // …	NM_022252 // GO:0008521 // acetyl-CoA transporter activity // non-traceable author statement /// ENSRNOT00000013392 // GO:0008521 // acetyl-CoA transporter activity // non-traceable author statement /// BC078832 // GO:0008521 // acetyl-CoA transporter activity // non-traceable author statement	---	2.61383														1.82096					2.21739
Alas1	aminolevulinic acid synthase 1 (Alas1), mRNA	2.86655	-2.02569														2.25386																			2.3
Pcca	propionyl-coenzyme A carboxylase, alpha polypeptide (Pcca), mRNA.	5.82083	-2.01657	2.8865	5.82083	-2.01657	2.8865	NM_019330	---	---	NM_019330 // Pcca // propionyl-coenzyme A carboxylase, alpha polypeptide // 15q25 // 687008 /// ENSRNOT00000019144 // Pcca // propionyl-coenzyme A carboxylase, alpha polypeptide // 15q25 // 687008 /// ENSRNOT00000057429 // Pcca // propionyl-coenzyme A carboxylase, alpha polypeptide // 15q25 // 687008	NM_019330 // RefSeq // Rattus norvegicus propionyl-coenzyme A carboxylase, alpha polypeptide (Pcca), mRNA. // chr15 // 100 // 100 // 30 // 30 // 0 /// ENSRNOT00000019144 // ENSEMBL // propionyl-coenzyme A carboxylase, alpha polypeptide gene:ENSRNOG00000014146 // chr15 // 100 // 100 // 30 // 30 // 0 /// ENSRNOT00000057429 // ENSEMBL // Uncharacterized protein gene:ENSRNOG00000014146 // chr15 // 10…	NM_019330 // GO:0009062 // fatty acid catabolic process // traceable author statement /// NM_019330 // GO:0009063 // cellular amino acid catabolic process // traceable author statement /// ENSRNOT00000019144 // GO:0009062 // fatty acid catabolic process // traceable author statement /// ENSRNOT00000019144 // GO:0009063 // cellular amino acid catabolic process // traceable author statement /// ENS…	NM_019330 // GO:0005739 // mitochondrion // inferred from direct assay /// NM_019330 // GO:0005759 // mitochondrial matrix // inferred from electronic annotation /// ENSRNOT00000019144 // GO:0005739 // mitochondrion // inferred from direct assay /// ENSRNOT00000019144 // GO:0005759 // mitochondrial matrix // inferred from electronic annotation /// ENSRNOT00000057429 // GO:0005739 // mitochondrion…	NM_019330 // GO:0000166 // nucleotide binding // inferred from electronic annotation /// NM_019330 // GO:0004658 // propionyl-CoA carboxylase activity // traceable author statement /// NM_019330 // GO:0005524 // ATP binding // inferred from electronic annotation /// NM_019330 // GO:0009374 // biotin binding // inferred from electronic annotation /// NM_019330 // GO:0016874 // ligase activity // i…	---	3.50348									-1.53038										0.98655
Ndufv1	NADH dehydrogenase (ubiquinone) flavoprotein 1 (Ndufv1), nuclear gene encoding mitochondrial protein, mRNA.	2.08905	-2.00449		2.08905	-2.00449		NM_001006972	---	---	NM_001006972 // Ndufv1 // NADH dehydrogenase (ubiquinone) flavoprotein 1 // 1q42 // 293655 /// ENSRNOT00000024517 // Ndufv1 // NADH dehydrogenase (ubiquinone) flavoprotein 1 // 1q42 // 293655 /// BC083709 // Ndufv1 // NADH dehydrogenase (ubiquinone) flavoprotein 1 // 1q42 // 293655	NM_001006972 // RefSeq // Rattus norvegicus NADH dehydrogenase (ubiquinone) flavoprotein 1 (Ndufv1), nuclear gene encoding mitochondrial protein, mRNA. // chr1 // 100 // 100 // 30 // 30 // 0 /// ENSRNOT00000024517 // ENSEMBL // NADH dehydrogenase (Ubiquinone) flavoprotein 1, isoform CRA_a gene:ENSRNOG00000018117 // chr1 // 100 // 100 // 30 // 30 // 0 /// BC083709 // GenBank // Rattus norvegicus N…	NM_001006972 // GO:0008150 // biological_process // no biological data available /// NM_001006972 // GO:0055114 // oxidation reduction // inferred from electronic annotation /// ENSRNOT00000024517 // GO:0008150 // biological_process // no biological data available /// ENSRNOT00000024517 // GO:0055114 // oxidation reduction // inferred from electronic annotation /// BC083709 // GO:0008150 // biolo…	NM_001006972 // GO:0005575 // cellular_component // no biological data available /// NM_001006972 // GO:0005739 // mitochondrion // inferred from electronic annotation /// NM_001006972 // GO:0005739 // mitochondrion // not recorded /// NM_001006972 // GO:0005743 // mitochondrial inner membrane // inferred from electronic annotation /// NM_001006972 // GO:0005743 // mitochondrial inner membrane //…	NM_001006972 // GO:0003674 // molecular_function // no biological data available /// NM_001006972 // GO:0008137 // NADH dehydrogenase (ubiquinone) activity // inferred from electronic annotation /// NM_001006972 // GO:0010181 // FMN binding // inferred from electronic annotation /// NM_001006972 // GO:0016651 // oxidoreductase activity, acting on NADH or NADPH // inferred from electronic annotati…	---	1.9943									1.53967										1.76699
Akr1b1	aldo-keto reductase family 1, member B1 (aldose reductase) (Akr1b1), mRNA.	3.08167	-2		3.08167			NM_012498	---	---	NM_012498 // Akr1b1 // aldo-keto reductase family 1, member B1 (aldose reductase) // 4q22 // 24192 /// ENSRNOT00000012879 // Akr1b1 // aldo-keto reductase family 1, member B1 (aldose reductase) // 4q22 // 24192 /// BC062034 // Akr1b1 // aldo-keto reductase family 1, member B1 (aldose reductase) // 4q22 // 24192	NM_012498 // RefSeq // Rattus norvegicus aldo-keto reductase family 1, member B1 (aldose reductase) (Akr1b1), mRNA. // chr4 // 100 // 100 // 22 // 22 // 0 /// ENSRNOT00000012879 // ENSEMBL // Aldose reductase gene:ENSRNOG00000009513 // chr4 // 100 // 100 // 22 // 22 // 0 /// BC062034 // GenBank // Rattus norvegicus aldo-keto reductase family 1, member B1 (aldose reductase), mRNA (cDNA clone MGC:7…	NM_012498 // GO:0006061 // sorbitol biosynthetic process // inferred from mutant phenotype /// NM_012498 // GO:0008152 // metabolic process // not recorded /// NM_012498 // GO:0010033 // response to organic substance // inferred from direct assay /// NM_012498 // GO:0031098 // stress-activated protein kinase signaling cascade // inferred from mutant phenotype /// NM_012498 // GO:0046427 // positi…	NM_012498 // GO:0005615 // extracellular space // inferred from direct assay /// NM_012498 // GO:0005737 // cytoplasm // inferred from electronic annotation /// NM_012498 // GO:0005829 // cytosol // not recorded /// ENSRNOT00000012879 // GO:0005615 // extracellular space // inferred from direct assay /// ENSRNOT00000012879 // GO:0005737 // cytoplasm // inferred from electronic annotation /// ENSR…	NM_012498 // GO:0004032 // aldehyde reductase activity // inferred from direct assay /// NM_012498 // GO:0004032 // aldehyde reductase activity // not recorded /// NM_012498 // GO:0005515 // protein binding // not recorded /// NM_012498 // GO:0016491 // oxidoreductase activity // inferred from electronic annotation /// ENSRNOT00000012879 // GO:0004032 // aldehyde reductase activity // inferred fr…	---
Ap1s2	adaptor-related protein complex 1, sigma 2 subunit (Ap1s2), mRNA.	3.13103	-2		3.13103			NM_001127531	---	---	NM_001127531 // Ap1s2 // adaptor-related protein complex 1, sigma 2 subunit // Xq21 // 302671 /// ENSRNOT00000065075 // Ap1s2 // adaptor-related protein complex 1, sigma 2 subunit // Xq21 // 302671 /// BC166480 // Ap1s2 // adaptor-related protein complex 1, sigma 2 subunit // Xq21 // 302671 /// ENSRNOT00000066270 // Ap1s2 // adaptor-related protein complex 1, sigma 2 subunit // Xq21 // 302671 ///…	NM_001127531 // RefSeq // Rattus norvegicus adaptor-related protein complex 1, sigma 2 subunit (Ap1s2), mRNA. // chrX // 100 // 89 // 24 // 24 // 0 /// ENSRNOT00000065075 // ENSEMBL // Ap1s2 protein gene:ENSRNOG00000038686 // chrX // 100 // 89 // 24 // 24 // 0 /// BC166480 // GenBank // Rattus norvegicus adaptor-related protein complex 1, sigma 2 subunit, mRNA (cDNA clone MGC:187937 IMAGE:9102341…	NM_001127531 // GO:0006886 // intracellular protein transport // inferred from electronic annotation /// NM_001127531 // GO:0006892 // post-Golgi vesicle-mediated transport // not recorded /// NM_001127531 // GO:0008150 // biological_process // no biological data available /// NM_001127531 // GO:0016044 // cellular membrane organization // not recorded /// NM_001127531 // GO:0016192 // vesicle-me…	NM_001127531 // GO:0005575 // cellular_component // no biological data available /// NM_001127531 // GO:0005829 // cytosol // not recorded /// NM_001127531 // GO:0030117 // membrane coat // inferred from electronic annotation /// NM_001127531 // GO:0030130 // clathrin coat of trans-Golgi network vesicle // inferred from electronic annotation /// NM_001127531 // GO:0030131 // clathrin adaptor comp…	NM_001127531 // GO:0003674 // molecular_function // no biological data available /// NM_001127531 // GO:0005515 // protein binding // inferred from electronic annotation /// NM_001127531 // GO:0008565 // protein transporter activity // inferred from electronic annotation /// ENSRNOT00000065075 // GO:0003674 // molecular_function // no biological data available /// ENSRNOT00000065075 // GO:0005515…	---						-1.54856		-1.54856		-4.80758	-2.6349					-3.72124		-1.6002	-2.66072	-2.65211
Ccdc127	coiled-coil domain containing 127 (Ccdc127), mRNA.	3.39441	-2		3.39441			NM_198766	---	---	NM_198766 // Ccdc127 // coiled-coil domain containing 127 // 1p11 // 308060 /// ENSRNOT00000017779 // Ccdc127 // coiled-coil domain containing 127 // 1p11 // 308060 /// BC058157 // Ccdc127 // coiled-coil domain containing 127 // 1p11 // 308060	NM_198766 // RefSeq // Rattus norvegicus coiled-coil domain containing 127 (Ccdc127), mRNA. // chr1 // 96 // 96 // 23 // 24 // 0 /// ENSRNOT00000017779 // ENSEMBL // Coiled-coil domain-containing protein 127 gene:ENSRNOG00000012775 // chr1 // 100 // 100 // 25 // 25 // 0 /// BC058157 // GenBank // Rattus norvegicus coiled-coil domain containing 127, mRNA (cDNA clone MGC:73017 IMAGE:6890640), compl…	---	---	---	---
Dph3	DPH3, KTI11 homolog (S. cerevisiae) (Dph3), mRNA.	3.07895	-2		3.07895			NM_001134850	---	---	NM_001134850 // Dph3 // DPH3, KTI11 homolog (S. cerevisiae) // 16p16 // 680594 /// ENSRNOT00000026742 // Dph3 // DPH3, KTI11 homolog (S. cerevisiae) // 16p16 // 680594 /// BC168674 // Dph3 // DPH3, KTI11 homolog (S. cerevisiae) // 16p16 // 680594 /// ENSRNOT00000064370 // Dph3 // DPH3, KTI11 homolog (S. cerevisiae) // 16p16 // 680594	NM_001134850 // RefSeq // Rattus norvegicus DPH3, KTI11 homolog (S. cerevisiae) (Dph3), mRNA. // chr16 // 100 // 100 // 25 // 25 // 0 /// ENSRNOT00000026742 // ENSEMBL // zinc finger, CSL domain containing 2 gene:ENSRNOG00000019727 // chr16 // 100 // 100 // 25 // 25 // 0 /// BC168674 // GenBank // Rattus norvegicus DPH3, KTI11 homolog (S. cerevisiae), mRNA (cDNA clone MGC:188477 IMAGE:7939231), c…	NM_001134850 // GO:0050709 // negative regulation of protein secretion // not recorded /// NM_001134850 // GO:0051099 // positive regulation of binding // not recorded /// ENSRNOT00000026742 // GO:0050709 // negative regulation of protein secretion // not recorded /// ENSRNOT00000026742 // GO:0051099 // positive regulation of binding // not recorded /// BC168674 // GO:0050709 // negative regulati…	NM_001134850 // GO:0005634 // nucleus // not recorded /// NM_001134850 // GO:0005737 // cytoplasm // not recorded /// ENSRNOT00000026742 // GO:0005634 // nucleus // not recorded /// ENSRNOT00000026742 // GO:0005737 // cytoplasm // not recorded /// BC168674 // GO:0005634 // nucleus // not recorded /// BC168674 // GO:0005737 // cytoplasm // not recorded /// ENSRNOT00000064370 // GO:0005634 // nucle…	NM_001134850 // GO:0005515 // protein binding // not recorded /// ENSRNOT00000026742 // GO:0005515 // protein binding // not recorded /// BC168674 // GO:0005515 // protein binding // not recorded /// ENSRNOT00000064370 // GO:0005515 // protein binding // not recorded	---						-1.57114		-1.57114			-1.57114					-1.57114			-1.57114	-1.57114
Esd	esterase D/formylglutathione hydrolase (Esd), mRNA.	3.22983	-2		3.22983			NM_001106051	---	---	NM_001106051 // Esd // esterase D/formylglutathione hydrolase // 15q11 // 290401 /// ENSRNOT00000013324 // Esd // esterase D/formylglutathione hydrolase // 15q11 // 290401 /// BC158790 // Esd // esterase D/formylglutathione hydrolase // 15q11 // 290401	NM_001106051 // RefSeq // Rattus norvegicus esterase D/formylglutathione hydrolase (Esd), mRNA. // chr15 // 100 // 95 // 20 // 20 // 0 /// ENSRNOT00000013324 // ENSEMBL // S-formylglutathione hydrolase gene:ENSRNOG00000009512 // chr15 // 100 // 95 // 20 // 20 // 0 /// BC158790 // GenBank // Rattus norvegicus esterase D/formylglutathione hydrolase, mRNA (cDNA clone MGC:188158 IMAGE:7308742), compl…	NM_001106051 // GO:0008150 // biological_process // no biological data available /// NM_001106051 // GO:0008152 // metabolic process // not recorded /// ENSRNOT00000013324 // GO:0008150 // biological_process // no biological data available /// ENSRNOT00000013324 // GO:0008152 // metabolic process // not recorded /// BC158790 // GO:0008150 // biological_process // no biological data available /// …	NM_001106051 // GO:0005575 // cellular_component // no biological data available /// NM_001106051 // GO:0005737 // cytoplasm // inferred from electronic annotation /// NM_001106051 // GO:0016023 // cytoplasmic membrane-bounded vesicle // inferred from electronic annotation /// ENSRNOT00000013324 // GO:0005575 // cellular_component // no biological data available /// ENSRNOT00000013324 // GO:00057…	NM_001106051 // GO:0003674 // molecular_function // no biological data available /// NM_001106051 // GO:0004091 // carboxylesterase activity // inferred from electronic annotation /// NM_001106051 // GO:0016788 // hydrolase activity, acting on ester bonds // not recorded /// NM_001106051 // GO:0018738 // S-formylglutathione hydrolase activity // inferred from electronic annotation /// ENSRNOT0000…	---										-1.54586					1.55059					0.002365
Hadh	hydroxyacyl-Coenzyme A dehydrogenase (Hadh), nuclear gene encoding mitochondrial protein, mRNA.	2.26553	-2		2.26553			NM_057186	---	---	NM_057186 // Hadh // hydroxyacyl-Coenzyme A dehydrogenase // 2q43 // 113965 /// ENSRNOT00000014658 // Hadh // hydroxyacyl-Coenzyme A dehydrogenase // 2q43 // 113965 /// AF095449 // Hadh // hydroxyacyl-Coenzyme A dehydrogenase // 2q43 // 113965	NM_057186 // RefSeq // Rattus norvegicus hydroxyacyl-Coenzyme A dehydrogenase (Hadh), nuclear gene encoding mitochondrial protein, mRNA. // chr2 // 97 // 100 // 31 // 32 // 0 /// ENSRNOT00000014658 // ENSEMBL // Hydroxyacyl-coenzyme A dehydrogenase, mitochondrial gene:ENSRNOG00000010697 // chr2 // 100 // 100 // 32 // 32 // 0 /// AF095449 // GenBank // Rattus norvegicus L-3-hydroxyacyl-CoA dehydro…	NM_057186 // GO:0006629 // lipid metabolic process // inferred from electronic annotation /// NM_057186 // GO:0006631 // fatty acid metabolic process // inferred from electronic annotation /// NM_057186 // GO:0006635 // fatty acid beta-oxidation // inferred from mutant phenotype /// NM_057186 // GO:0008152 // metabolic process // not recorded /// NM_057186 // GO:0009725 // response to hormone sti…	NM_057186 // GO:0005737 // cytoplasm // not recorded /// NM_057186 // GO:0005739 // mitochondrion // inferred from electronic annotation /// NM_057186 // GO:0005739 // mitochondrion // not recorded /// NM_057186 // GO:0005743 // mitochondrial inner membrane // inferred from electronic annotation /// NM_057186 // GO:0005743 // mitochondrial inner membrane // not recorded /// NM_057186 // GO:000575…	NM_057186 // GO:0003857 // 3-hydroxyacyl-CoA dehydrogenase activity // inferred from mutant phenotype /// NM_057186 // GO:0003857 // 3-hydroxyacyl-CoA dehydrogenase activity // not recorded /// NM_057186 // GO:0005515 // protein binding // inferred from direct assay /// NM_057186 // GO:0016491 // oxidoreductase activity // inferred from electronic annotation /// NM_057186 // GO:0050662 // coenzym…	AF095449 // GenMAPP // Fatty_Acid_Degradation /// AF095449 // GenMAPP // Fatty_Acid_Synthesis /// AF095449 // GenMAPP // Mitochondrial_fatty_acid_betaoxidation										-1.75404										-1.75404
Hprt1	hypoxanthine phosphoribosyltransferase 1 (Hprt1), mRNA.	3.47061	-2		3.47061			NM_012583	---	---	NM_012583 // Hprt1 // hypoxanthine phosphoribosyltransferase 1 // Xq36 // 24465 /// ENSRNOT00000045153 // Hprt1 // hypoxanthine phosphoribosyltransferase 1 // Xq36 // 24465 /// BC098629 // Hprt1 // hypoxanthine phosphoribosyltransferase 1 // Xq36 // 24465 /// ENSRNOT00000065935 // Hprt1 // hypoxanthine phosphoribosyltransferase 1 // Xq36 // 24465	NM_012583 // RefSeq // Rattus norvegicus hypoxanthine phosphoribosyltransferase 1 (Hprt1), mRNA. // chrX // 100 // 100 // 14 // 14 // 0 /// ENSRNOT00000045153 // ENSEMBL // Hypoxanthine-guanine phosphoribosyltransferase gene:ENSRNOG00000031367 // chrX // 100 // 100 // 14 // 14 // 0 /// BC098629 // GenBank // Rattus norvegicus hypoxanthine phosphoribosyltransferase 1, mRNA (cDNA clone MGC:112554 I…	NM_012583 // GO:0001975 // response to amphetamine // inferred from electronic annotation /// NM_012583 // GO:0001975 // response to amphetamine // not recorded /// NM_012583 // GO:0006164 // purine nucleotide biosynthetic process // not recorded /// NM_012583 // GO:0006166 // purine ribonucleoside salvage // inferred from electronic annotation /// NM_012583 // GO:0006166 // purine ribonucleoside…	NM_012583 // GO:0005625 // soluble fraction // inferred from direct assay /// NM_012583 // GO:0005737 // cytoplasm // inferred from electronic annotation /// NM_012583 // GO:0005737 // cytoplasm // not recorded /// NM_012583 // GO:0005829 // cytosol // not recorded /// ENSRNOT00000045153 // GO:0005625 // soluble fraction // inferred from direct assay /// ENSRNOT00000045153 // GO:0005737 // cytopl…	NM_012583 // GO:0000287 // magnesium ion binding // not recorded /// NM_012583 // GO:0004422 // hypoxanthine phosphoribosyltransferase activity // inferred from direct assay /// NM_012583 // GO:0004422 // hypoxanthine phosphoribosyltransferase activity // not recorded /// NM_012583 // GO:0005515 // protein binding // not recorded /// NM_012583 // GO:0016740 // transferase activity // inferred fro…	---										-1.89258			1.50965		2.10957					0.575547
Mobkl3	MOB1, Mps One Binder kinase activator-like 3 (yeast) (Mobkl3), mRNA.	2.44563	-2		2.44563			NM_133528	---	---	NM_133528 // Mobkl3 // MOB1, Mps One Binder kinase activator-like 3 (yeast) // 9q31 // 171050 /// ENSRNOT00000020536 // Mobkl3 // MOB1, Mps One Binder kinase activator-like 3 (yeast) // 9q31 // 171050 /// BC085708 // Mobkl3 // MOB1, Mps One Binder kinase activator-like 3 (yeast) // 9q31 // 171050	NM_133528 // RefSeq // Rattus norvegicus MOB1, Mps One Binder kinase activator-like 3 (yeast) (Mobkl3), mRNA. // chr9 // 100 // 100 // 32 // 32 // 0 /// ENSRNOT00000020536 // ENSEMBL // Mps one binder kinase activator-like 3 gene:ENSRNOG00000014980 // chr9 // 100 // 100 // 32 // 32 // 0 /// BC085708 // GenBank // Rattus norvegicus MOB1, Mps One Binder kinase activator-like 3 (yeast), mRNA (cDNA c…	NM_133528 // GO:0006810 // transport // inferred from electronic annotation /// ENSRNOT00000020536 // GO:0006810 // transport // inferred from electronic annotation /// BC085708 // GO:0006810 // transport // inferred from electronic annotation	NM_133528 // GO:0005624 // membrane fraction // inferred from direct assay /// NM_133528 // GO:0005737 // cytoplasm // inferred from electronic annotation /// NM_133528 // GO:0005794 // Golgi apparatus // inferred from electronic annotation /// NM_133528 // GO:0005794 // Golgi apparatus // not recorded /// NM_133528 // GO:0016020 // membrane // inferred from electronic annotation /// NM_133528 //…	NM_133528 // GO:0005515 // protein binding // inferred from direct assay /// NM_133528 // GO:0005515 // protein binding // not recorded /// NM_133528 // GO:0046872 // metal ion binding // inferred from electronic annotation /// ENSRNOT00000020536 // GO:0005515 // protein binding // inferred from direct assay /// ENSRNOT00000020536 // GO:0005515 // protein binding // not recorded /// ENSRNOT000000…	---										-1.69308			1.7087		2.34272					0.786113
Nppb	natriuretic peptide precursor B (Nppb), mRNA.	3.20397	-2		3.20397			NM_031545	---	---	NM_031545 // Nppb // natriuretic peptide precursor B // 5q36 // 25105 /// ENSRNOT00000010779 // Nppb // natriuretic peptide precursor B // 5q36 // 25105 /// M25297 // Nppb // natriuretic peptide precursor B // 5q36 // 25105	NM_031545 // RefSeq // Rattus norvegicus natriuretic peptide precursor B (Nppb), mRNA. // chr5 // 88 // 100 // 22 // 25 // 0 /// ENSRNOT00000010779 // ENSEMBL // Natriuretic peptides B gene:ENSRNOG00000008141 // chr5 // 100 // 100 // 25 // 25 // 0 /// M25297 // GenBank // Rattus norvegicus brain natriuretic peptide (BNP) mRNA, complete cds. // chr5 // 88 // 100 // 22 // 25 // 0	NM_031545 // GO:0001666 // response to hypoxia // inferred from expression pattern /// NM_031545 // GO:0006182 // cGMP biosynthetic process // inferred from direct assay /// NM_031545 // GO:0006182 // cGMP biosynthetic process // not recorded /// NM_031545 // GO:0006954 // inflammatory response // inferred from expression pattern /// NM_031545 // GO:0007168 // receptor guanylyl cyclase signaling …	NM_031545 // GO:0005576 // extracellular region // inferred from electronic annotation /// NM_031545 // GO:0005615 // extracellular space // inferred from direct assay /// NM_031545 // GO:0005634 // nucleus // inferred from direct assay /// NM_031545 // GO:0005737 // cytoplasm // inferred from direct assay /// NM_031545 // GO:0048471 // perinuclear region of cytoplasm // inferred from direct assa…	NM_031545 // GO:0005102 // receptor binding // not recorded /// NM_031545 // GO:0005179 // hormone activity // inferred from direct assay /// NM_031545 // GO:0051428 // peptide hormone receptor binding // inferred from direct assay /// ENSRNOT00000010779 // GO:0005102 // receptor binding // not recorded /// ENSRNOT00000010779 // GO:0005179 // hormone activity // inferred from direct assay /// ENS…	---			3.77664		6.51564		4.04964	4.78064			5.11531		14.5459			9.8306			12.1883	7.22195
Prmt1	protein arginine methyltransferase 1 (Prmt1), mRNA.	2.35128	-2		2.35128			NM_024363	---	---	NM_024363 // Prmt1 // protein arginine methyltransferase 1 // 1q22 // 60421 /// ENSRNOT00000064272 // Prmt1 // protein arginine methyltransferase 1 // 1q22 // 60421 /// BC078815 // Prmt1 // protein arginine methyltransferase 1 // 1q22 // 60421 /// ENSRNOT00000027761 // Prmt1 // protein arginine methyltransferase 1 // 1q22 // 60421 /// ENSRNOT00000066547 // Prmt1 // protein arginine methyltransfer…	NM_024363 // RefSeq // Rattus norvegicus protein arginine methyltransferase 1 (Prmt1), mRNA. // chr14 // 100 // 100 // 33 // 33 // 0 /// ENSRNOT00000064272 // ENSEMBL // Protein arginine N-methyltransferase 1 gene:ENSRNOG00000026109 // chr14 // 100 // 100 // 33 // 33 // 0 /// BC078815 // GenBank // Rattus norvegicus protein arginine methyltransferase 1, mRNA (cDNA clone MGC:93411 IMAGE:7106257), …	NM_024363 // GO:0001701 // in utero embryonic development // not recorded /// NM_024363 // GO:0006479 // protein methylation // inferred from direct assay /// NM_024363 // GO:0006479 // protein methylation // not recorded /// NM_024363 // GO:0018216 // peptidyl-arginine methylation // inferred from direct assay /// NM_024363 // GO:0019919 // peptidyl-arginine methylation, to asymmetrical-dimethyl…	NM_024363 // GO:0005634 // nucleus // inferred from direct assay /// NM_024363 // GO:0005634 // nucleus // not recorded /// NM_024363 // GO:0005737 // cytoplasm // inferred from electronic annotation /// NM_024363 // GO:0043234 // protein complex // inferred from direct assay /// ENSRNOT00000064272 // GO:0005634 // nucleus // inferred from direct assay /// ENSRNOT00000064272 // GO:0005634 // nucl…	NM_024363 // GO:0005515 // protein binding // inferred from physical interaction /// NM_024363 // GO:0005515 // protein binding // not recorded /// NM_024363 // GO:0008276 // protein methyltransferase activity // inferred from direct assay /// NM_024363 // GO:0008276 // protein methyltransferase activity // inferred from electronic annotation /// NM_024363 // GO:0008276 // protein methyltransfera…	BC078815 // GenMAPP // mRNA_processing_Reactome
Psmb7	proteasome (prosome, macropain) subunit, beta type 7 (Psmb7), mRNA.	2.88504	-2		2.88504			NM_053532	---	---	NM_053532 // Psmb7 // proteasome (prosome, macropain) subunit, beta type 7 // 3q11 // 85492 /// ENSRNOT00000016876 // Psmb7 // proteasome (prosome, macropain) subunit, beta type 7 // 3q11 // 85492 /// BC060551 // Psmb7 // proteasome (prosome, macropain) subunit, beta type 7 // 3q11 // 85492	NM_053532 // RefSeq // Rattus norvegicus proteasome (prosome, macropain) subunit, beta type 7 (Psmb7), mRNA. // chr3 // 100 // 100 // 26 // 26 // 0 /// ENSRNOT00000016876 // ENSEMBL // Proteasome subunit beta type-7 gene:ENSRNOG00000011732 // chr3 // 100 // 100 // 26 // 26 // 0 /// BC060551 // GenBank // Rattus norvegicus proteasome (prosome, macropain) subunit, beta type 7, mRNA (cDNA clone MGC:…	NM_053532 // GO:0031145 // anaphase-promoting complex-dependent proteasomal ubiquitin-dependent protein catabolic process // not recorded /// NM_053532 // GO:0051436 // negative regulation of ubiquitin-protein ligase activity involved in mitotic cell cycle // not recorded /// NM_053532 // GO:0051437 // positive regulation of ubiquitin-protein ligase activity involved in mitotic cell cycle // not …	NM_053532 // GO:0005634 // nucleus // inferred from electronic annotation /// NM_053532 // GO:0005737 // cytoplasm // inferred from electronic annotation /// NM_053532 // GO:0005839 // proteasome core complex // inferred from electronic annotation /// ENSRNOT00000016876 // GO:0005634 // nucleus // inferred from electronic annotation /// ENSRNOT00000016876 // GO:0005737 // cytoplasm // inferred fr…	NM_053532 // GO:0004298 // threonine-type endopeptidase activity // inferred from electronic annotation /// NM_053532 // GO:0008233 // peptidase activity // inferred from electronic annotation /// ENSRNOT00000016876 // GO:0004298 // threonine-type endopeptidase activity // inferred from electronic annotation /// ENSRNOT00000016876 // GO:0008233 // peptidase activity // inferred from electronic an…	BC060551 // GenMAPP // Proteasome_Degradation										-1.55171										-1.55171
Rpl22l1	ribosomal protein L22 like 1 (Rpl22l1), mRNA.	3.67749	-2		3.67749			NM_001108548	---	---	NM_001108548 // Rpl22l1 // ribosomal protein L22 like 1 // 2q24 // 361923 /// ENSRNOT00000015756 // Rpl22l1 // ribosomal protein L22 like 1 // 2q24 // 361923 /// BC167114 // Rpl22l1 // ribosomal protein L22 like 1 // 2q24 // 361923	NM_001108548 // RefSeq // Rattus norvegicus ribosomal protein L22 like 1 (Rpl22l1), mRNA. // chr3 // 80 // 100 // 24 // 30 // 0 /// ENSRNOT00000015756 // ENSEMBL // Ribosomal protein L22 like 1 gene:ENSRNOG00000011817 // chr3 // 80 // 100 // 24 // 30 // 0 /// BC167114 // GenBank // Rattus norvegicus ribosomal protein L22 like 1, mRNA (cDNA clone MGC:189578 IMAGE:6919691), complete cds. // chr3 //…	NM_001108548 // GO:0006412 // translation // inferred from electronic annotation /// ENSRNOT00000015756 // GO:0006412 // translation // inferred from electronic annotation /// BC167114 // GO:0006412 // translation // inferred from electronic annotation	NM_001108548 // GO:0005622 // intracellular // inferred from electronic annotation /// NM_001108548 // GO:0005840 // ribosome // inferred from electronic annotation /// ENSRNOT00000015756 // GO:0005622 // intracellular // inferred from electronic annotation /// ENSRNOT00000015756 // GO:0005840 // ribosome // inferred from electronic annotation /// BC167114 // GO:0005622 // intracellular // inferr…	NM_001108548 // GO:0003735 // structural constituent of ribosome // inferred from electronic annotation /// ENSRNOT00000015756 // GO:0003735 // structural constituent of ribosome // inferred from electronic annotation /// BC167114 // GO:0003735 // structural constituent of ribosome // inferred from electronic annotation	---		-1.92711	-1.89803	-1.78771		-1.74572	-1.93279	-1.85827			-1.84559					-1.84559			-1.84559	-1.85827
Tmem50b	transmembrane protein 50B (Tmem50b), mRNA.	3.10055	-2		3.10055			NM_001025014	---	---	NM_001025014 // Tmem50b // transmembrane protein 50B // 11q11 // 360698 /// ENSRNOT00000002775 // Tmem50b // transmembrane protein 50B // 11q11 // 360698 /// BC091349 // Tmem50b // transmembrane protein 50B // 11q11 // 360698	NM_001025014 // RefSeq // Rattus norvegicus transmembrane protein 50B (Tmem50b), mRNA. // chr11 // 96 // 100 // 25 // 26 // 0 /// ENSRNOT00000002775 // ENSEMBL // Transmembrane protein 50B, isoform CRA_b gene:ENSRNOG00000002028 // chr11 // 100 // 100 // 26 // 26 // 0 /// BC091349 // GenBank // Rattus norvegicus transmembrane protein 50B, mRNA (cDNA clone MGC:109374 IMAGE:7316764), complete cds. /…	---	NM_001025014 // GO:0005783 // endoplasmic reticulum // inferred from electronic annotation /// NM_001025014 // GO:0005783 // endoplasmic reticulum // not recorded /// NM_001025014 // GO:0005886 // plasma membrane // inferred from electronic annotation /// NM_001025014 // GO:0005886 // plasma membrane // not recorded /// NM_001025014 // GO:0016021 // integral to membrane // inferred from electroni…	---	---															1.61592					1.61592
Ufc1	ubiquitin-fold modifier conjugating enzyme 1 (Ufc1), mRNA.	2.69523	-2		2.69523			NM_001003709	---	---	NM_001003709 // Ufc1 // ubiquitin-fold modifier conjugating enzyme 1 // 13q24 // 445268 /// ENSRNOT00000004938 // Ufc1 // ubiquitin-fold modifier conjugating enzyme 1 // 13q24 // 445268 /// BC087648 // Ufc1 // ubiquitin-fold modifier conjugating enzyme 1 // 13q24 // 445268	NM_001003709 // RefSeq // Rattus norvegicus ubiquitin-fold modifier conjugating enzyme 1 (Ufc1), mRNA. // chr13 // 100 // 100 // 25 // 25 // 0 /// ENSRNOT00000004938 // ENSEMBL // Ubiquitin-fold modifier-conjugating enzyme 1 gene:ENSRNOG00000003706 // chr13 // 100 // 100 // 25 // 25 // 0 /// BC087648 // GenBank // Rattus norvegicus ubiquitin-fold modifier conjugating enzyme 1, mRNA (cDNA clone MG…	NM_001003709 // GO:0071569 // protein ufmylation // inferred from electronic annotation /// NM_001003709 // GO:0071569 // protein ufmylation // not recorded /// NM_001003709 // GO:0071569 // protein ufmylation // inferred from sequence or structural similarity /// ENSRNOT00000004938 // GO:0071569 // protein ufmylation // inferred from electronic annotation /// ENSRNOT00000004938 // GO:0071569 // …	---	NM_001003709 // GO:0005515 // protein binding // inferred from electronic annotation /// NM_001003709 // GO:0005515 // protein binding // not recorded /// NM_001003709 // GO:0071568 // UFM1 conjugating enzyme activity // inferred from electronic annotation /// NM_001003709 // GO:0071568 // UFM1 conjugating enzyme activity // not recorded /// NM_001003709 // GO:0071568 // UFM1 conjugating enzyme a…	---
Ugp2	UDP-glucose pyrophosphorylase 2 (Ugp2), mRNA.	5.46249	-2	2.7767	5.46249		2.7767	NM_001024743	---	---	NM_001024743 // Ugp2 // UDP-glucose pyrophosphorylase 2 // 14q22 // 289827 /// ENSRNOT00000067668 // Ugp2 // UDP-glucose pyrophosphorylase 2 // 14q22 // 289827 /// BC097369 // Ugp2 // UDP-glucose pyrophosphorylase 2 // 14q22 // 289827 /// ENSRNOT00000010663 // Ugp2 // UDP-glucose pyrophosphorylase 2 // 14q22 // 289827	NM_001024743 // RefSeq // Rattus norvegicus UDP-glucose pyrophosphorylase 2 (Ugp2), mRNA. // chr14 // 100 // 100 // 31 // 31 // 0 /// ENSRNOT00000067668 // ENSEMBL // UDP-glucose pyrophosphorylase 2, isoform CRA_b gene:ENSRNOG00000008079 // chr14 // 100 // 97 // 30 // 30 // 0 /// BC097369 // GenBank // Rattus norvegicus UDP-glucose pyrophosphorylase 2, mRNA (cDNA clone MGC:114404 IMAGE:7443949), …	NM_001024743 // GO:0006011 // UDP-glucose metabolic process // inferred from direct assay /// NM_001024743 // GO:0006065 // UDP-glucuronate biosynthetic process // not recorded /// NM_001024743 // GO:0008152 // metabolic process // inferred from electronic annotation /// NM_001024743 // GO:0019255 // glucose 1-phosphate metabolic process // inferred from direct assay /// ENSRNOT00000067668 // GO:…	NM_001024743 // GO:0005625 // soluble fraction // inferred from direct assay /// NM_001024743 // GO:0005737 // cytoplasm // inferred from direct assay /// ENSRNOT00000067668 // GO:0005625 // soluble fraction // inferred from direct assay /// ENSRNOT00000067668 // GO:0005737 // cytoplasm // inferred from direct assay /// BC097369 // GO:0005625 // soluble fraction // inferred from direct assay /// …	NM_001024743 // GO:0003983 // UTP:glucose-1-phosphate uridylyltransferase activity // inferred from direct assay /// NM_001024743 // GO:0005515 // protein binding // not recorded /// NM_001024743 // GO:0005536 // glucose binding // inferred from direct assay /// NM_001024743 // GO:0016779 // nucleotidyltransferase activity // inferred from electronic annotation /// NM_001024743 // GO:0032557 // p…	---
Idh1	isocitrate dehydrogenase 1 (NADP+), soluble (Idh1), mRNA.	1.99515	-1.99221		1.99515	-1.99221		NM_031510	---	---	NM_031510 // Idh1 // isocitrate dehydrogenase 1 (NADP+), soluble // 9q32 // 24479 /// ENSRNOT00000020322 // Idh1 // isocitrate dehydrogenase 1 (NADP+), soluble // 9q32 // 24479 /// L35317 // Idh1 // isocitrate dehydrogenase 1 (NADP+), soluble // 9q32 // 24479 /// ENSRNOT00000044302 // Idh1 // isocitrate dehydrogenase 1 (NADP+), soluble // 9q32 // 24479	NM_031510 // RefSeq // Rattus norvegicus isocitrate dehydrogenase 1 (NADP+), soluble (Idh1), mRNA. // chr9 // 100 // 100 // 32 // 32 // 0 /// ENSRNOT00000020322 // ENSEMBL // Isocitrate dehydrogenase [NADP] cytoplasmic gene:ENSRNOG00000015020 // chr9 // 100 // 100 // 32 // 32 // 0 /// L35317 // GenBank // Rattus norvegicus cytosolic NADP-dependent isocitrate dehydrogenase mRNA, complete cds. // c…	NM_031510 // GO:0006099 // tricarboxylic acid cycle // inferred from electronic annotation /// NM_031510 // GO:0006102 // isocitrate metabolic process // inferred from direct assay /// NM_031510 // GO:0006102 // isocitrate metabolic process // inferred from electronic annotation /// NM_031510 // GO:0006102 // isocitrate metabolic process // not recorded /// NM_031510 // GO:0006103 // 2-oxoglutara…	NM_031510 // GO:0005625 // soluble fraction // inferred from direct assay /// NM_031510 // GO:0005737 // cytoplasm // inferred from electronic annotation /// NM_031510 // GO:0005737 // cytoplasm // not recorded /// NM_031510 // GO:0005739 // mitochondrion // inferred from electronic annotation /// NM_031510 // GO:0005739 // mitochondrion // not recorded /// NM_031510 // GO:0005829 // cytosol // i…	NM_031510 // GO:0000287 // magnesium ion binding // inferred from electronic annotation /// NM_031510 // GO:0000287 // magnesium ion binding // not recorded /// NM_031510 // GO:0004450 // isocitrate dehydrogenase (NADP+) activity // inferred from direct assay /// NM_031510 // GO:0004450 // isocitrate dehydrogenase (NADP+) activity // inferred from electronic annotation /// NM_031510 // GO:0004450…	---			-1.64127			-1.74994	-1.55751	-1.64957		-1.50173	-1.61469					-1.55821			-1.55821	-1.61261
Pdp2	pyruvate dehydrogenase phosphatase isoenzyme 2 (Pdp2), mRNA.	2.09716	-1.99175		2.09716	-1.99175		NM_145091	---	---	NM_145091 // Pdp2 // pyruvate dehyrogenase phosphatase catalytic subunit 2 // 19p14 // 246311 /// ENSRNOT00000016462 // Pdp2 // pyruvate dehyrogenase phosphatase catalytic subunit 2 // 19p14 // 246311 /// BC072485 // Pdp2 // pyruvate dehyrogenase phosphatase catalytic subunit 2 // 19p14 // 246311	NM_145091 // RefSeq // Rattus norvegicus pyruvate dehyrogenase phosphatase catalytic subunit 2 (Pdp2), mRNA. // chr19 // 100 // 54 // 14 // 14 // 0 /// ENSRNOT00000016462 // ENSEMBL // [Pyruvate dehydrogenase [acetyl-transferring]]-phosphatase 2, mitochondrial gene:ENSRNOG00000012343 // chr19 // 100 // 65 // 17 // 17 // 0 /// BC072485 // GenBank // Rattus norvegicus pyruvate dehydrogenase phospha…	NM_145091 // GO:0006470 // protein dephosphorylation // inferred from direct assay /// NM_145091 // GO:0009758 // carbohydrate utilization // traceable author statement /// NM_145091 // GO:0010510 // regulation of acetyl-CoA biosynthetic process from pyruvate // not recorded /// ENSRNOT00000016462 // GO:0006470 // protein dephosphorylation // inferred from direct assay /// ENSRNOT00000016462 // G…	NM_145091 // GO:0005739 // mitochondrion // inferred from direct assay /// NM_145091 // GO:0005739 // mitochondrion // not recorded /// NM_145091 // GO:0005759 // mitochondrial matrix // inferred from expression pattern /// NM_145091 // GO:0008287 // protein serine/threonine phosphatase complex // inferred from electronic annotation /// NM_145091 // GO:0019910 // mitochondrial pyruvate dehydrogen…	NM_145091 // GO:0000287 // magnesium ion binding // inferred by curator /// NM_145091 // GO:0004724 // magnesium-dependent protein serine/threonine phosphatase activity // inferred from direct assay /// NM_145091 // GO:0004741 // [pyruvate dehydrogenase (lipoamide)] phosphatase activity // inferred from direct assay /// NM_145091 // GO:0016787 // hydrolase activity // inferred from electronic ann…	---	-3.00339																			-3.00339
Hspb7	heat shock protein family, member 7 (cardiovascular) (Hspb7), mRNA.	2.40123	-1.9854		2.40123	-1.9854		NM_031607	---	---	NM_031607 // Hspb7 // heat shock protein family, member 7 (cardiovascular) // 5q36 // 50565 /// ENSRNOT00000051317 // Hspb7 // heat shock protein family, member 7 (cardiovascular) // 5q36 // 50565 /// BC169050 // Hspb7 // heat shock protein family, member 7 (cardiovascular) // 5q36 // 50565 /// ENSRNOT00000043435 // Hspb7 // heat shock protein family, member 7 (cardiovascular) // 5q36 // 50565	NM_031607 // RefSeq // Rattus norvegicus heat shock protein family, member 7 (cardiovascular) (Hspb7), mRNA. // chr5 // 100 // 100 // 25 // 25 // 0 /// ENSRNOT00000051317 // ENSEMBL // heat shock protein beta-7 gene:ENSRNOG00000029079 // chr5 // 100 // 100 // 25 // 25 // 0 /// BC169050 // GenBank // Rattus norvegicus heat shock protein family, member 7 (cardiovascular), mRNA (cDNA clone MGC:18944…	NM_031607 // GO:0006950 // response to stress // not recorded /// NM_031607 // GO:0009408 // response to heat // inferred from direct assay /// NM_031607 // GO:0009408 // response to heat // inferred from electronic annotation /// ENSRNOT00000051317 // GO:0006950 // response to stress // not recorded /// ENSRNOT00000051317 // GO:0009408 // response to heat // inferred from direct assay /// ENSRNO…	NM_031607 // GO:0005739 // mitochondrion // not recorded /// ENSRNOT00000051317 // GO:0005739 // mitochondrion // not recorded /// BC169050 // GO:0005739 // mitochondrion // not recorded /// ENSRNOT00000043435 // GO:0005739 // mitochondrion // not recorded	NM_031607 // GO:0005515 // protein binding // not recorded /// ENSRNOT00000051317 // GO:0005515 // protein binding // not recorded /// BC169050 // GO:0005515 // protein binding // not recorded /// ENSRNOT00000043435 // GO:0005515 // protein binding // not recorded	---	2.31451																			2.31451
Hat1	histone acetyltransferase 1 (Hat1), mRNA.	2.63805	-1.98217		2.63805	-1.98217		NM_001009657	---	---	NM_001009657 // Hat1 // histone acetyltransferase 1 // 3q21 // 296501 /// ENSRNOT00000002085 // Hat1 // histone acetyltransferase 1 // 3q21 // 296501 /// BC087663 // Hat1 // histone acetyltransferase 1 // 3q21 // 296501 /// ENSRNOT00000064665 // Hat1 // histone acetyltransferase 1 // 3q21 // 296501	NM_001009657 // RefSeq // Rattus norvegicus histone acetyltransferase 1 (Hat1), mRNA. // chr3 // 100 // 100 // 28 // 28 // 0 /// ENSRNOT00000002085 // ENSEMBL // Histone acetyltransferase type B catalytic subunit gene:ENSRNOG00000001524 // chr3 // 100 // 100 // 28 // 28 // 0 /// BC087663 // GenBank // Rattus norvegicus histone acetyltransferase 1, mRNA (cDNA clone MGC:105743 IMAGE:7315259), compl…	NM_001009657 // GO:0006348 // chromatin silencing at telomere // inferred from electronic annotation /// NM_001009657 // GO:0007584 // response to nutrient // inferred from expression pattern /// NM_001009657 // GO:0016568 // chromatin modification // inferred from electronic annotation /// NM_001009657 // GO:0016573 // histone acetylation // inferred from electronic annotation /// ENSRNOT0000000…	NM_001009657 // GO:0005575 // cellular_component // no biological data available /// NM_001009657 // GO:0005634 // nucleus // inferred from electronic annotation /// NM_001009657 // GO:0005737 // cytoplasm // inferred from electronic annotation /// ENSRNOT00000002085 // GO:0005575 // cellular_component // no biological data available /// ENSRNOT00000002085 // GO:0005634 // nucleus // inferred fro…	NM_001009657 // GO:0003674 // molecular_function // no biological data available /// NM_001009657 // GO:0004402 // histone acetyltransferase activity // inferred from electronic annotation /// NM_001009657 // GO:0005515 // protein binding // inferred from electronic annotation /// NM_001009657 // GO:0005515 // protein binding // not recorded /// NM_001009657 // GO:0008415 // acyltransferase activ…	---						-1.54096		-1.54096		-1.51997	-1.53396				2.02399	-0.343314			0.840338	-0.345647
Bola3	bolA homolog 3 (E. coli) (Bola3), mRNA.	3.88864	-1.97994	1.96401	3.88864	-1.97994	1.96401	NM_001106601	---	---	NM_001106601 // Bola3 // bolA homolog 3 (E. coli) // 4q34 // 297388 /// ENSRNOT00000031583 // Bola3 // bolA homolog 3 (E. coli) // 4q34 // 297388	NM_001106601 // RefSeq // Rattus norvegicus bolA homolog 3 (E. coli) (Bola3), mRNA. // chr4 // 100 // 100 // 25 // 25 // 0 /// ENSRNOT00000031583 // ENSEMBL // Uncharacterized protein gene:ENSRNOG00000021866 // chr4 // 100 // 100 // 25 // 25 // 0	NM_001106601 // GO:0008150 // biological_process // no biological data available /// ENSRNOT00000031583 // GO:0008150 // biological_process // no biological data available	NM_001106601 // GO:0005575 // cellular_component // no biological data available /// ENSRNOT00000031583 // GO:0005575 // cellular_component // no biological data available	NM_001106601 // GO:0003674 // molecular_function // no biological data available /// ENSRNOT00000031583 // GO:0003674 // molecular_function // no biological data available	---
Gys1	glycogen synthase 1, muscle (Gys1), mRNA.	1.61698	-1.97256		1.61698	-1.97256		NM_001109615	---	---	NM_001109615 // Gys1 // glycogen synthase 1, muscle // 1q22 // 690987 /// ENSRNOT00000028271 // Gys1 // glycogen synthase 1, muscle // 1q22 // 690987 /// BC131849 // Gys1 // glycogen synthase 1, muscle // 1q22 // 690987	NM_001109615 // RefSeq // Rattus norvegicus glycogen synthase 1, muscle (Gys1), mRNA. // chr1 // 100 // 100 // 30 // 30 // 0 /// ENSRNOT00000028271 // ENSEMBL // Glycogen [starch] synthase, muscle gene:ENSRNOG00000020812 // chr1 // 100 // 100 // 30 // 30 // 0 /// BC131849 // GenBank // Rattus norvegicus glycogen synthase 1, muscle, mRNA (cDNA clone MGC:156743 IMAGE:7108272), complete cds. // chr1…	NM_001109615 // GO:0005977 // glycogen metabolic process // inferred from direct assay /// NM_001109615 // GO:0005978 // glycogen biosynthetic process // inferred from direct assay /// NM_001109615 // GO:0005978 // glycogen biosynthetic process // not recorded /// NM_001109615 // GO:0007507 // heart development // inferred from electronic annotation /// NM_001109615 // GO:0007507 // heart develop…	NM_001109615 // GO:0005625 // soluble fraction // inferred from direct assay /// NM_001109615 // GO:0005737 // cytoplasm // inferred from electronic annotation /// NM_001109615 // GO:0005737 // cytoplasm // not recorded /// NM_001109615 // GO:0016234 // inclusion body // inferred from electronic annotation /// NM_001109615 // GO:0016234 // inclusion body // not recorded /// ENSRNOT00000028271 // …	NM_001109615 // GO:0004373 // glycogen (starch) synthase activity // inferred from direct assay /// NM_001109615 // GO:0004373 // glycogen (starch) synthase activity // not recorded /// NM_001109615 // GO:0005515 // protein binding // inferred from electronic annotation /// NM_001109615 // GO:0005515 // protein binding // not recorded /// NM_001109615 // GO:0005536 // glucose binding // inferred …	---												1.70248	1.70754							1.70501
Casq1	calsequestrin 1 (fast-twitch, skeletal muscle) (Casq1), nuclear gene encoding mitochondrial protein, mRNA.	1.89316	-1.97255		1.89316	-1.97255		NM_001159594	---	---	NM_001159594 // Casq1 // calsequestrin 1 (fast-twitch, skeletal muscle) // 13q24 // 686019 /// ENSRNOT00000009344 // Casq1 // calsequestrin 1 (fast-twitch, skeletal muscle) // 13q24 // 686019	NM_001159594 // RefSeq // Rattus norvegicus calsequestrin 1 (fast-twitch, skeletal muscle) (Casq1), nuclear gene encoding mitochondrial protein, mRNA. // chr13 // 100 // 100 // 33 // 33 // 0 /// ENSRNOT00000009344 // ENSEMBL // calsequestrin 1 gene:ENSRNOG00000006930 // chr13 // 100 // 100 // 33 // 33 // 0	NM_001159594 // GO:0006950 // response to stress // inferred from expression pattern /// NM_001159594 // GO:0007519 // skeletal muscle tissue development // inferred from expression pattern /// NM_001159594 // GO:0010033 // response to organic substance // inferred from expression pattern /// NM_001159594 // GO:0014894 // response to denervation involved in regulation of muscle adaptation // infe…	NM_001159594 // GO:0005737 // cytoplasm // inferred from direct assay /// NM_001159594 // GO:0005739 // mitochondrion // not recorded /// NM_001159594 // GO:0005792 // microsome // inferred from direct assay /// NM_001159594 // GO:0005794 // Golgi apparatus // inferred from direct assay /// NM_001159594 // GO:0014802 // terminal cisterna // inferred from direct assay /// NM_001159594 // GO:001480…	NM_001159594 // GO:0003674 // molecular_function // no biological data available /// NM_001159594 // GO:0005509 // calcium ion binding // inferred from electronic annotation /// ENSRNOT00000009344 // GO:0003674 // molecular_function // no biological data available /// ENSRNOT00000009344 // GO:0005509 // calcium ion binding // inferred from electronic annotation	---			-1.80926				-1.88194	-1.8456			-1.86377					-1.86377			-1.86377	-1.8456
Pgm1	phosphoglucomutase 1 (Pgm1), mRNA.	1.66796	-1.97092			-1.97092		NM_017033	GenMAPP	Glycogen_Metabolism	NM_017033 // Pgm1 // phosphoglucomutase 1 // 5q33 // 24645 /// ENSRNOT00000013785 // Pgm1 // phosphoglucomutase 1 // 5q33 // 24645 /// BC099807 // Pgm1 // phosphoglucomutase 1 // 5q33 // 24645 /// ENSRNOT00000066876 // Pgm1 // phosphoglucomutase 1 // 5q33 // 24645	NM_017033 // RefSeq // Rattus norvegicus phosphoglucomutase 1 (Pgm1), mRNA. // chr5 // 100 // 100 // 36 // 36 // 0 /// ENSRNOT00000013785 // ENSEMBL // phosphoglucomutase-1 gene:ENSRNOG00000009889 // chr5 // 100 // 100 // 36 // 36 // 0 /// BC099807 // GenBank // Rattus norvegicus phosphoglucomutase 1, mRNA (cDNA clone MGC:124624 IMAGE:7937943), complete cds. // chr5 // 100 // 100 // 36 // 36 // 0…	NM_017033 // GO:0005975 // carbohydrate metabolic process // traceable author statement /// NM_017033 // GO:0006006 // glucose metabolic process // inferred from electronic annotation /// NM_017033 // GO:0006006 // glucose metabolic process // not recorded /// NM_017033 // GO:0006874 // cellular calcium ion homeostasis // traceable author statement /// NM_017033 // GO:0009314 // response to radia…	NM_017033 // GO:0005737 // cytoplasm // inferred from electronic annotation /// NM_017033 // GO:0005829 // cytosol // not recorded /// ENSRNOT00000013785 // GO:0005737 // cytoplasm // inferred from electronic annotation /// ENSRNOT00000013785 // GO:0005829 // cytosol // not recorded /// BC099807 // GO:0005737 // cytoplasm // inferred from electronic annotation /// BC099807 // GO:0005829 // cytoso…	NM_017033 // GO:0000287 // magnesium ion binding // inferred from electronic annotation /// NM_017033 // GO:0003674 // molecular_function // no biological data available /// NM_017033 // GO:0004614 // phosphoglucomutase activity // inferred from electronic annotation /// NM_017033 // GO:0004614 // phosphoglucomutase activity // not recorded /// NM_017033 // GO:0016853 // isomerase activity // inf…	NM_017033 // GenMAPP // Glycogen_Metabolism /// BC099807 // GenMAPP // Glycogen_Metabolism
Mrpl46	mitochondrial ribosomal protein L46 (Mrpl46), nuclear gene encoding mitochondrial protein, mRNA.	2.04669	-1.9647		2.04669	-1.9647		NM_001013068	---	---	NM_001013068 // Mrpl46 // mitochondrial ribosomal protein L46 // 1q31 // 293054 /// ENSRNOT00000067172 // Mrpl46 // mitochondrial ribosomal protein L46 // 1q31 // 293054 /// BC086407 // Mrpl46 // mitochondrial ribosomal protein L46 // 1q31 // 293054 /// ENSRNOT00000025042 // Mrpl46 // mitochondrial ribosomal protein L46 // 1q31 // 293054	NM_001013068 // RefSeq // Rattus norvegicus mitochondrial ribosomal protein L46 (Mrpl46), nuclear gene encoding mitochondrial protein, mRNA. // chr1 // 100 // 100 // 25 // 25 // 0 /// ENSRNOT00000067172 // ENSEMBL // 39S ribosomal protein L46, mitochondrial gene:ENSRNOG00000018547 // chr1 // 100 // 100 // 25 // 25 // 0 /// BC086407 // GenBank // Rattus norvegicus mitochondrial ribosomal protein L…	---	NM_001013068 // GO:0005739 // mitochondrion // inferred from electronic annotation /// NM_001013068 // GO:0005739 // mitochondrion // not recorded /// NM_001013068 // GO:0005840 // ribosome // inferred from electronic annotation /// ENSRNOT00000067172 // GO:0005739 // mitochondrion // inferred from electronic annotation /// ENSRNOT00000067172 // GO:0005739 // mitochondrion // not recorded /// ENS…	NM_001013068 // GO:0016787 // hydrolase activity // inferred from electronic annotation /// ENSRNOT00000067172 // GO:0016787 // hydrolase activity // inferred from electronic annotation /// BC086407 // GO:0016787 // hydrolase activity // inferred from electronic annotation /// ENSRNOT00000025042 // GO:0016787 // hydrolase activity // inferred from electronic annotation	---	4.62421																			4.62421
Pmm1	phosphomannomutase 1 (Pmm1), mRNA.	1.51239	-1.9637			-1.9637		NM_001008323	---	---	NM_001008323 // Pmm1 // phosphomannomutase 1 // 7q34 // 300089 /// ENSRNOT00000007164 // Pmm1 // phosphomannomutase 1 // 7q34 // 300089 /// BC086346 // Pmm1 // phosphomannomutase 1 // 7q34 // 300089 /// ENSRNOT00000007349 // Pmm1 // phosphomannomutase 1 // 7q34 // 300089	NM_001008323 // RefSeq // Rattus norvegicus phosphomannomutase 1 (Pmm1), mRNA. // chr7 // 100 // 100 // 8 // 8 // 0 /// ENSRNOT00000007164 // ENSEMBL // Phosphomannomutase 1, isoform CRA_c gene:ENSRNOG00000005358 // chr7 // 100 // 100 // 8 // 8 // 0 /// BC086346 // GenBank // Rattus norvegicus phosphomannomutase 1, mRNA (cDNA clone MGC:105960 IMAGE:7302298), complete cds. // chr7 // 100 // 100 //…	NM_001008323 // GO:0019307 // mannose biosynthetic process // inferred from electronic annotation /// ENSRNOT00000007164 // GO:0019307 // mannose biosynthetic process // inferred from electronic annotation /// BC086346 // GO:0019307 // mannose biosynthetic process // inferred from electronic annotation /// ENSRNOT00000007349 // GO:0019307 // mannose biosynthetic process // inferred from electroni…	NM_001008323 // GO:0005737 // cytoplasm // inferred from electronic annotation /// ENSRNOT00000007164 // GO:0005737 // cytoplasm // inferred from electronic annotation /// BC086346 // GO:0005737 // cytoplasm // inferred from electronic annotation /// ENSRNOT00000007349 // GO:0005737 // cytoplasm // inferred from electronic annotation	NM_001008323 // GO:0003824 // catalytic activity // inferred from electronic annotation /// NM_001008323 // GO:0004615 // phosphomannomutase activity // inferred from electronic annotation /// ENSRNOT00000007164 // GO:0003824 // catalytic activity // inferred from electronic annotation /// ENSRNOT00000007164 // GO:0004615 // phosphomannomutase activity // inferred from electronic annotation /// B…	---
Lonp1	lon peptidase 1, mitochondrial (Lonp1), nuclear gene encoding mitochondrial protein, mRNA.	1.94526	-1.95747		1.94526	-1.95747		NM_133404	---	---	NM_133404 // Lonp1 // lon peptidase 1, mitochondrial // 9q11 // 170916 /// AB064323 // Lonp1 // lon peptidase 1, mitochondrial // 9q11 // 170916	NM_133404 // RefSeq // Rattus norvegicus lon peptidase 1, mitochondrial (Lonp1), nuclear gene encoding mitochondrial protein, mRNA. // chrUn // 100 // 97 // 32 // 32 // 0 /// AB064323 // GenBank // Rattus norvegicus mRNA for Lon, complete cds. // chrUn // 100 // 97 // 32 // 32 // 0	NM_133404 // GO:0001666 // response to hypoxia // inferred from expression pattern /// NM_133404 // GO:0001666 // response to hypoxia // not recorded /// NM_133404 // GO:0006200 // ATP catabolic process // not recorded /// NM_133404 // GO:0006508 // proteolysis // inferred from direct assay /// NM_133404 // GO:0006508 // proteolysis // inferred from electronic annotation /// NM_133404 // GO:00065…	NM_133404 // GO:0005739 // mitochondrion // inferred from direct assay /// NM_133404 // GO:0005739 // mitochondrion // not recorded /// NM_133404 // GO:0005759 // mitochondrial matrix // inferred from direct assay /// NM_133404 // GO:0005759 // mitochondrial matrix // not recorded /// NM_133404 // GO:0042645 // mitochondrial nucleoid // not recorded /// AB064323 // GO:0005739 // mitochondrion // …	NM_133404 // GO:0000166 // nucleotide binding // inferred from electronic annotation /// NM_133404 // GO:0003677 // DNA binding // inferred from electronic annotation /// NM_133404 // GO:0003697 // single-stranded DNA binding // not recorded /// NM_133404 // GO:0003727 // single-stranded RNA binding // not recorded /// NM_133404 // GO:0004176 // ATP-dependent peptidase activity // inferred from d…	---
Pole4	polymerase (DNA-directed), epsilon 4 (p12 subunit) (Pole4), mRNA.	2.85994	-1.95687		2.85994	-1.95687		NM_001108634	---	---	NM_001108634 // Pole4 // polymerase (DNA-directed), epsilon 4 (p12 subunit) // 4q34 // 362385 /// ENSRNOT00000067314 // Pole4 // polymerase (DNA-directed), epsilon 4 (p12 subunit) // 4q34 // 362385 /// BC166842 // Pole4 // polymerase (DNA-directed), epsilon 4 (p12 subunit) // 4q34 // 362385 /// ENSRNOT00000008005 // Pole4 // polymerase (DNA-directed), epsilon 4 (p12 subunit) // 4q34 // 362385	NM_001108634 // RefSeq // Rattus norvegicus polymerase (DNA-directed), epsilon 4 (p12 subunit) (Pole4), mRNA. // chr4 // 100 // 93 // 26 // 26 // 0 /// ENSRNOT00000067314 // ENSEMBL // Uncharacterized protein gene:ENSRNOG00000006102 // chr4 // 100 // 93 // 26 // 26 // 0 /// BC166842 // GenBank // Rattus norvegicus polymerase (DNA-directed), epsilon 4 (p12 subunit), mRNA (cDNA clone MGC:188734 IMA…	---	NM_001108634 // GO:0005622 // intracellular // inferred from electronic annotation /// ENSRNOT00000067314 // GO:0005622 // intracellular // inferred from electronic annotation /// BC166842 // GO:0005622 // intracellular // inferred from electronic annotation /// ENSRNOT00000008005 // GO:0005622 // intracellular // inferred from electronic annotation	NM_001108634 // GO:0005515 // protein binding // not recorded /// NM_001108634 // GO:0043565 // sequence-specific DNA binding // inferred from electronic annotation /// ENSRNOT00000067314 // GO:0005515 // protein binding // not recorded /// ENSRNOT00000067314 // GO:0043565 // sequence-specific DNA binding // inferred from electronic annotation /// BC166842 // GO:0005515 // protein binding // not …	---				-1.54766		-1.74599	-1.72007	-1.67124			-1.71243					-1.71243			-1.71243	-1.67124
Ephx2	epoxide hydrolase 2, cytoplasmic (Ephx2), mRNA.	2.36531	-1.95311		2.36531	-1.95311		NM_022936	---	---	NM_022936 // Ephx2 // epoxide hydrolase 2, cytoplasmic // 15p12 // 65030 /// ENSRNOT00000023390 // Ephx2 // epoxide hydrolase 2, cytoplasmic // 15p12 // 65030 /// BC085732 // Ephx2 // epoxide hydrolase 2, cytoplasmic // 15p12 // 65030 /// ENSRNOT00000023385 // Ephx2 // epoxide hydrolase 2, cytoplasmic // 15p12 // 65030	NM_022936 // RefSeq // Rattus norvegicus epoxide hydrolase 2, cytoplasmic (Ephx2), mRNA. // chr15 // 92 // 100 // 35 // 38 // 0 /// ENSRNOT00000023390 // ENSEMBL // Epoxide hydrolase 2 gene:ENSRNOG00000017286 // chr15 // 100 // 95 // 36 // 36 // 0 /// BC085732 // GenBank // Rattus norvegicus epoxide hydrolase 2, cytoplasmic, mRNA (cDNA clone MGC:93421 IMAGE:7188942), complete cds. // chr15 // 100…	NM_022936 // GO:0002539 // prostaglandin production involved in inflammatory response // inferred from mutant phenotype /// NM_022936 // GO:0006954 // inflammatory response // inferred from mutant phenotype /// NM_022936 // GO:0009636 // response to toxin // inferred from electronic annotation /// NM_022936 // GO:0019233 // sensory perception of pain // inferred from mutant phenotype /// NM_02293…	NM_022936 // GO:0005737 // cytoplasm // inferred from electronic annotation /// NM_022936 // GO:0005777 // peroxisome // inferred from direct assay /// NM_022936 // GO:0005777 // peroxisome // traceable author statement /// NM_022936 // GO:0005829 // cytosol // inferred from direct assay /// NM_022936 // GO:0005829 // cytosol // traceable author statement /// ENSRNOT00000023390 // GO:0005737 // c…	NM_022936 // GO:0000287 // magnesium ion binding // inferred from mutant phenotype /// NM_022936 // GO:0003869 // 4-nitrophenylphosphatase activity // inferred from direct assay /// NM_022936 // GO:0004301 // epoxide hydrolase activity // inferred from direct assay /// NM_022936 // GO:0004301 // epoxide hydrolase activity // not recorded /// NM_022936 // GO:0016787 // hydrolase activity // inferr…	---		1.8681	1.54376	1.72058	1.76633		1.60481	1.70072			1.69062					1.69062			1.69062	1.70072
Rfk	riboflavin kinase (Rfk), mRNA.	2.09415	-1.94552		2.09415	-1.94552		NM_001014106	---	---	NM_001014106 // Rfk // riboflavin kinase // 1q43 // 499328 /// BC079125 // Rfk // riboflavin kinase // 1q43 // 499328	NM_001014106 // RefSeq // Rattus norvegicus riboflavin kinase (Rfk), mRNA. // chrX // 100 // 100 // 37 // 37 // 0 /// BC079125 // GenBank // Rattus norvegicus riboflavin kinase, mRNA (cDNA clone MGC:94132 IMAGE:7127049), complete cds. // chrX // 100 // 100 // 37 // 37 // 0 /// ENSRNOT00000030491 // ENSEMBL // cdna:known chromosome:RGSC3.4:1:220924547:220932059:1 gene:ENSRNOG00000022273 // chrX //…	NM_001014106 // GO:0009231 // riboflavin biosynthetic process // inferred from electronic annotation /// BC079125 // GO:0009231 // riboflavin biosynthetic process // inferred from electronic annotation	---	NM_001014106 // GO:0008531 // riboflavin kinase activity // inferred from electronic annotation /// BC079125 // GO:0008531 // riboflavin kinase activity // inferred from electronic annotation	---															2.09257					2.09257
Timm10	translocase of inner mitochondrial membrane 10 homolog (yeast) (Timm10), nuclear gene encoding mitochondrial protein, mRNA.	2.96395	-1.94372	1.52488	2.96395	-1.94372	1.52488	NM_172074	---	---	NM_172074 // Timm10 // translocase of inner mitochondrial membrane 10 homolog (yeast) // 3q24 // 64464 /// ENSRNOT00000010619 // Timm10 // translocase of inner mitochondrial membrane 10 homolog (yeast) // 3q24 // 64464 /// BC091116 // Timm10 // translocase of inner mitochondrial membrane 10 homolog (yeast) // 3q24 // 64464	NM_172074 // RefSeq // Rattus norvegicus translocase of inner mitochondrial membrane 10 homolog (yeast) (Timm10), nuclear gene encoding mitochondrial protein, mRNA. // chr3 // 100 // 100 // 26 // 26 // 0 /// ENSRNOT00000010619 // ENSEMBL // Mitochondrial import inner membrane translocase subunit Tim10 gene:ENSRNOG00000007883 // chr3 // 100 // 100 // 26 // 26 // 0 /// BC091116 // GenBank // Rattus…	NM_172074 // GO:0015031 // protein transport // inferred from electronic annotation /// NM_172074 // GO:0045039 // protein import into mitochondrial inner membrane // inferred from electronic annotation /// NM_172074 // GO:0055085 // transmembrane transport // inferred from electronic annotation /// ENSRNOT00000010619 // GO:0015031 // protein transport // inferred from electronic annotation /// E…	NM_172074 // GO:0005739 // mitochondrion // inferred from electronic annotation /// NM_172074 // GO:0005739 // mitochondrion // not recorded /// NM_172074 // GO:0005743 // mitochondrial inner membrane // inferred from electronic annotation /// NM_172074 // GO:0016020 // membrane // inferred from electronic annotation /// NM_172074 // GO:0042719 // mitochondrial intermembrane space protein transpo…	NM_172074 // GO:0005515 // protein binding // inferred from electronic annotation /// NM_172074 // GO:0046872 // metal ion binding // inferred from electronic annotation /// ENSRNOT00000010619 // GO:0005515 // protein binding // inferred from electronic annotation /// ENSRNOT00000010619 // GO:0046872 // metal ion binding // inferred from electronic annotation /// BC091116 // GO:0005515 // protein…	---
Znhit1	18 kDa protein gene:ENSRNOG00000001418		-1.94338			-1.94338		ENSRNOT00000001922	---	---	ENSRNOT00000040015 // LOC100360077 // zinc finger, HIT domain containing 1 // --- // 100360077 /// ENSRNOT00000001922 // LOC100360077 // zinc finger, HIT domain containing 1 // --- // 100360077 /// XM_001076915 // Znhit1 // zinc finger, HIT domain containing 1 // 12q12 // 360784 /// XM_002727957 // LOC100360077 // zinc finger, HIT domain containing 1 // --- // 100360077	ENSRNOT00000040015 // ENSEMBL // Uncharacterized protein gene:ENSRNOG00000001418 // chr12 // 100 // 100 // 25 // 25 // 0 /// ENSRNOT00000001922 // ENSEMBL // Uncharacterized protein gene:ENSRNOG00000001418 // chr12 // 100 // 100 // 25 // 25 // 0 /// XM_001076915 // RefSeq // PREDICTED: Rattus norvegicus zinc finger, HIT domain containing 1 (Znhit1), mRNA. // chr12 // 100 // 72 // 18 // 18 // 0 //…	---	---	---	---
Eya4	similar to Eyes absent homolog 4 isoform 6 gene:ENSRNOG00000016627	1.70566	-1.9398			-1.9398		ENSRNOT00000022362	---	---	ENSRNOT00000022362 // Eya4 // eyes absent homolog 4 (Drosophila) // 1p12 // 292172 /// ENSRNOT00000061180 // Eya4 // eyes absent homolog 4 (Drosophila) // 1p12 // 292172 /// BC107460 // Eya4 // eyes absent homolog 4 (Drosophila) // 1p12 // 292172 /// XM_217715 // Eya4 // eyes absent homolog 4 (Drosophila) // 1p12 // 292172	ENSRNOT00000022362 // ENSEMBL // eyes absent homolog 4 (Drosophila) isoform 7 gene:ENSRNOG00000016627 // chr1 // 100 // 90 // 18 // 18 // 0 /// ENSRNOT00000061180 // ENSEMBL // 64 kDa protein gene:ENSRNOG00000016627 // chr1 // 100 // 90 // 18 // 18 // 0 /// BC107460 // GenBank HTC // Rattus norvegicus cDNA clone IMAGE:7454989, containing frame-shift errors. // chr1 // 100 // 85 // 17 // 17 // 0 /…	ENSRNOT00000022362 // GO:0007275 // multicellular organismal development // inferred from electronic annotation /// ENSRNOT00000022362 // GO:0048839 // inner ear development // inferred from expression pattern /// ENSRNOT00000061180 // GO:0007275 // multicellular organismal development // inferred from electronic annotation /// ENSRNOT00000061180 // GO:0048839 // inner ear development // inferred…	ENSRNOT00000022362 // GO:0005575 // cellular_component // no biological data available /// ENSRNOT00000061180 // GO:0005575 // cellular_component // no biological data available /// BC107460 // GO:0005575 // cellular_component // no biological data available /// XM_217715 // GO:0005575 // cellular_component // no biological data available	ENSRNOT00000022362 // GO:0003674 // molecular_function // no biological data available /// ENSRNOT00000022362 // GO:0003824 // catalytic activity // inferred from electronic annotation /// ENSRNOT00000061180 // GO:0003674 // molecular_function // no biological data available /// ENSRNOT00000061180 // GO:0003824 // catalytic activity // inferred from electronic annotation /// BC107460 // GO:000367…	---		2.17005		1.98888	2.11649		1.53597	1.95285		-1.62687	0.994609					-0.31613			-0.31613	1.2369
Dci	dodecenoyl-Coenzyme A delta isomerase (3,2 trans-enoyl-Coenzyme A isomerase) (Dci), nuclear gene encoding mitochondrial protein, mRNA.	2.25615	-1.9394		2.25615	-1.9394		NM_017306	GenMAPP	Mitochondrial_fatty_acid_betaoxidation	NM_017306 // Dci // dodecenoyl-Coenzyme A delta isomerase (3,2 trans-enoyl-Coenzyme A isomerase) // 10q12 // 29740 /// ENSRNOT00000011784 // Dci // dodecenoyl-Coenzyme A delta isomerase (3,2 trans-enoyl-Coenzyme A isomerase) // 10q12 // 29740 /// BC078705 // Dci // dodecenoyl-Coenzyme A delta isomerase (3,2 trans-enoyl-Coenzyme A isomerase) // 10q12 // 29740	NM_017306 // RefSeq // Rattus norvegicus dodecenoyl-Coenzyme A delta isomerase (3,2 trans-enoyl-Coenzyme A isomerase) (Dci), nuclear gene encoding mitochondrial protein, mRNA. // chr10 // 100 // 100 // 28 // 28 // 0 /// ENSRNOT00000011784 // ENSEMBL // Dodecenoyl-coenzyme A delta isomerase gene:ENSRNOG00000008843 // chr10 // 100 // 100 // 28 // 28 // 0 /// BC078705 // GenBank // Rattus norvegicus…	NM_017306 // GO:0006629 // lipid metabolic process // inferred from electronic annotation /// NM_017306 // GO:0006631 // fatty acid metabolic process // inferred from electronic annotation /// NM_017306 // GO:0006635 // fatty acid beta-oxidation // not recorded /// NM_017306 // GO:0006635 // fatty acid beta-oxidation // traceable author statement /// NM_017306 // GO:0008152 // metabolic process /…	NM_017306 // GO:0005739 // mitochondrion // inferred from direct assay /// NM_017306 // GO:0005739 // mitochondrion // not recorded /// NM_017306 // GO:0005739 // mitochondrion // traceable author statement /// NM_017306 // GO:0005743 // mitochondrial inner membrane // inferred from electronic annotation /// NM_017306 // GO:0005743 // mitochondrial inner membrane // not recorded /// NM_017306 // …	NM_017306 // GO:0004165 // dodecenoyl-CoA delta-isomerase activity // inferred from direct assay /// NM_017306 // GO:0004165 // dodecenoyl-CoA delta-isomerase activity // not recorded /// NM_017306 // GO:0016853 // isomerase activity // inferred from electronic annotation /// NM_017306 // GO:0042802 // identical protein binding // inferred from direct assay /// ENSRNOT00000011784 // GO:0004165 //…	NM_017306 // GenMAPP // Mitochondrial_fatty_acid_betaoxidation /// BC078705 // GenMAPP // Mitochondrial_fatty_acid_betaoxidation
Mrps9	mitochondrial ribosomal protein S9 (Mrps9), nuclear gene encoding mitochondrial protein, mRNA.	2.75813	-1.93845		2.75813	-1.93845		NM_001100549	---	---	NM_001100549 // Mrps9 // mitochondrial ribosomal protein S9 // 9q22 // 301371 /// ENSRNOT00000021899 // Mrps9 // mitochondrial ribosomal protein S9 // 9q22 // 301371 /// BC158704 // Mrps9 // mitochondrial ribosomal protein S9 // 9q22 // 301371	NM_001100549 // RefSeq // Rattus norvegicus mitochondrial ribosomal protein S9 (Mrps9), nuclear gene encoding mitochondrial protein, mRNA. // chr9 // 100 // 97 // 31 // 31 // 0 /// ENSRNOT00000021899 // ENSEMBL // mitochondrial ribosomal protein S9 gene:ENSRNOG00000016201 // chr9 // 100 // 97 // 31 // 31 // 0 /// BC158704 // GenBank // Rattus norvegicus mitochondrial ribosomal protein S9, mRNA (c…	---	NM_001100549 // GO:0005739 // mitochondrion // not recorded /// ENSRNOT00000021899 // GO:0005739 // mitochondrion // not recorded /// BC158704 // GO:0005739 // mitochondrion // not recorded	NM_001100549 // GO:0005515 // protein binding // not recorded /// ENSRNOT00000021899 // GO:0005515 // protein binding // not recorded /// BC158704 // GO:0005515 // protein binding // not recorded	---	2.85761																			2.85761
Fdft1	farnesyl diphosphate farnesyl transferase 1 (Fdft1), mRNA.	2.23168	-1.93842		2.23168	-1.93842		NM_019238	---	---	NM_019238 // Fdft1 // farnesyl diphosphate farnesyl transferase 1 // 15p12 // 29580 /// ENSRNOT00000032089 // Fdft1 // farnesyl diphosphate farnesyl transferase 1 // 15p12 // 29580 /// BC081810 // Fdft1 // farnesyl diphosphate farnesyl transferase 1 // 15p12 // 29580	NM_019238 // RefSeq // Rattus norvegicus farnesyl diphosphate farnesyl transferase 1 (Fdft1), mRNA. // chr15 // 100 // 100 // 27 // 27 // 0 /// ENSRNOT00000032089 // ENSEMBL // Squalene synthase gene:ENSRNOG00000021314 // chr15 // 100 // 100 // 27 // 27 // 0 /// BC081810 // GenBank // Rattus norvegicus farnesyl diphosphate farnesyl transferase 1, mRNA (cDNA clone MGC:93486 IMAGE:7188993), complet…	NM_019238 // GO:0006695 // cholesterol biosynthetic process // inferred from mutant phenotype /// NM_019238 // GO:0006695 // cholesterol biosynthetic process // traceable author statement /// NM_019238 // GO:0008299 // isoprenoid biosynthetic process // inferred from electronic annotation /// NM_019238 // GO:0045338 // farnesyl diphosphate metabolic process // inferred from mutant phenotype /// N…	NM_019238 // GO:0005783 // endoplasmic reticulum // inferred from electronic annotation /// NM_019238 // GO:0005783 // endoplasmic reticulum // not recorded /// NM_019238 // GO:0005789 // endoplasmic reticulum membrane // inferred from electronic annotation /// NM_019238 // GO:0005789 // endoplasmic reticulum membrane // not recorded /// NM_019238 // GO:0005792 // microsome // inferred from direc…	NM_019238 // GO:0004310 // farnesyl-diphosphate farnesyltransferase activity // inferred from direct assay /// NM_019238 // GO:0004310 // farnesyl-diphosphate farnesyltransferase activity // inferred from mutant phenotype /// NM_019238 // GO:0004310 // farnesyl-diphosphate farnesyltransferase activity // not recorded /// NM_019238 // GO:0005515 // protein binding // inferred from electronic annot…	BC081810 // GenMAPP // Cholesterol_Biosynthesis /// BC081810 // GenMAPP // Cholesterol_biosynthesis_KEGG													1.64169		1.95637					1.79903
Yipf7	Yip1 domain family, member 7 (Yipf7), mRNA.	1.8409	-1.93237		1.8409	-1.93237		NM_001108861	---	---	NM_001108861 // Yipf7 // Yip1 domain family, member 7 // 14p11 // 364147 /// ENSRNOT00000003024 // Yipf7 // Yip1 domain family, member 7 // 14p11 // 364147	NM_001108861 // RefSeq // Rattus norvegicus Yip1 domain family, member 7 (Yipf7), mRNA. // chr14 // 100 // 96 // 24 // 24 // 0 /// ENSRNOT00000003024 // ENSEMBL // Uncharacterized protein gene:ENSRNOG00000002224 // chr14 // 100 // 96 // 24 // 24 // 0	---	NM_001108861 // GO:0016020 // membrane // inferred from electronic annotation /// ENSRNOT00000003024 // GO:0016020 // membrane // inferred from electronic annotation	---	---
Bckdhb	branched chain keto acid dehydrogenase E1, beta polypeptide (Bckdhb), nuclear gene encoding mitochondrial protein, mRNA.	3.82986	-1.93201	1.98232	3.82986	-1.93201	1.98232	NM_019267	---	---	NM_019267 // Bckdhb // branched chain keto acid dehydrogenase E1, beta polypeptide // 8q31 // 29711 /// ENSRNOT00000013249 // Bckdhb // branched chain keto acid dehydrogenase E1, beta polypeptide // 8q31 // 29711 /// BC158861 // Bckdhb // branched chain keto acid dehydrogenase E1, beta polypeptide // 8q31 // 29711 /// ENSRNOT00000067256 // Bckdhb // branched chain keto acid dehydrogenase E1, beta…	NM_019267 // RefSeq // Rattus norvegicus branched chain keto acid dehydrogenase E1, beta polypeptide (Bckdhb), nuclear gene encoding mitochondrial protein, mRNA. // chr8 // 100 // 100 // 33 // 33 // 0 /// ENSRNOT00000013249 // ENSEMBL // 2-oxoisovalerate dehydrogenase subunit beta, mitochondrial gene:ENSRNOG00000009928 // chr8 // 100 // 100 // 33 // 33 // 0 /// BC158861 // GenBank // Rattus norve…	NM_019267 // GO:0007584 // response to nutrient // inferred from expression pattern /// NM_019267 // GO:0008152 // metabolic process // not recorded /// NM_019267 // GO:0009083 // branched chain family amino acid catabolic process // not recorded /// NM_019267 // GO:0051384 // response to glucocorticoid stimulus // inferred from expression pattern /// NM_019267 // GO:0051591 // response to cAMP /…	NM_019267 // GO:0005575 // cellular_component // no biological data available /// NM_019267 // GO:0005739 // mitochondrion // not recorded /// NM_019267 // GO:0005947 // mitochondrial alpha-ketoglutarate dehydrogenase complex // not recorded /// ENSRNOT00000013249 // GO:0005575 // cellular_component // no biological data available /// ENSRNOT00000013249 // GO:0005739 // mitochondrion // not recor…	NM_019267 // GO:0003824 // catalytic activity // inferred from electronic annotation /// NM_019267 // GO:0003826 // alpha-ketoacid dehydrogenase activity // not recorded /// NM_019267 // GO:0005515 // protein binding // not recorded /// NM_019267 // GO:0032403 // protein complex binding // inferred from physical interaction /// ENSRNOT00000013249 // GO:0003824 // catalytic activity // inferred fr…	---						-1.58228		-1.58228		-1.58362	-1.58273					-1.58317			-1.58317	-1.58295
Ndufa8	NADH dehydrogenase (ubiquinone) 1 alpha subcomplex, 8 (Ndufa8), nuclear gene encoding mitochondrial protein, mRNA.	2.58049	-1.92999		2.58049	-1.92999		NM_001047862	---	---	NM_001047862 // Ndufa8 // NADH dehydrogenase (ubiquinone) 1 alpha subcomplex, 8 // 3p11 // 296658 /// ENSRNOT00000044885 // Ndufa8 // NADH dehydrogenase (ubiquinone) 1 alpha subcomplex, 8 // 3p11 // 296658 /// ENSRNOT00000007840 // Ndufa8 // NADH dehydrogenase (ubiquinone) 1 alpha subcomplex, 8 // 3p11 // 296658	NM_001047862 // RefSeq // Rattus norvegicus NADH dehydrogenase (ubiquinone) 1 alpha subcomplex, 8 (Ndufa8), nuclear gene encoding mitochondrial protein, mRNA. // chr3 // 100 // 93 // 26 // 26 // 0 /// ENSRNOT00000044885 // ENSEMBL // Aa2-258 gene:ENSRNOG00000005668 // chr3 // 100 // 93 // 26 // 26 // 0 /// ENSRNOT00000007840 // ENSEMBL // Uncharacterized protein gene:ENSRNOG00000005668 // chr3 //…	NM_001047862 // GO:0008150 // biological_process // no biological data available /// ENSRNOT00000044885 // GO:0008150 // biological_process // no biological data available /// ENSRNOT00000007840 // GO:0008150 // biological_process // no biological data available	NM_001047862 // GO:0005575 // cellular_component // no biological data available /// NM_001047862 // GO:0005739 // mitochondrion // inferred from electronic annotation /// NM_001047862 // GO:0005739 // mitochondrion // not recorded /// NM_001047862 // GO:0005743 // mitochondrial inner membrane // inferred from electronic annotation /// NM_001047862 // GO:0005743 // mitochondrial inner membrane //…	NM_001047862 // GO:0003674 // molecular_function // no biological data available /// ENSRNOT00000044885 // GO:0003674 // molecular_function // no biological data available /// ENSRNOT00000007840 // GO:0003674 // molecular_function // no biological data available	---	1.64815																			1.64815
Aldh7a1	similar to aldehyde dehydrogenase family 7, member A1 gene:ENSRNOG00000014645	2.12707	-1.92918		2.12707	-1.92918		ENSRNOT00000020325	---	---	ENSRNOT00000020325 // Aldh7a1 // aldehyde dehydrogenase 7 family, member A1 // 18q12.1 // 291450	ENSRNOT00000020325 // ENSEMBL // Alpha-aminoadipic semialdehyde dehydrogenase gene:ENSRNOG00000014645 // chr18 // 100 // 94 // 34 // 34 // 0	ENSRNOT00000020325 // GO:0055114 // oxidation reduction // inferred from electronic annotation	ENSRNOT00000020325 // GO:0005634 // nucleus // inferred from electronic annotation /// ENSRNOT00000020325 // GO:0005737 // cytoplasm // inferred from electronic annotation /// ENSRNOT00000020325 // GO:0005739 // mitochondrion // inferred from electronic annotation /// ENSRNOT00000020325 // GO:0005739 // mitochondrion // not recorded /// ENSRNOT00000020325 // GO:0005829 // cytosol // inferred from…	ENSRNOT00000020325 // GO:0004029 // aldehyde dehydrogenase (NAD) activity // inferred from electronic annotation /// ENSRNOT00000020325 // GO:0004043 // L-aminoadipate-semialdehyde dehydrogenase activity // inferred from electronic annotation /// ENSRNOT00000020325 // GO:0008802 // betaine-aldehyde dehydrogenase activity // inferred from electronic annotation /// ENSRNOT00000020325 // GO:0016491 …	---	2.70433			1.51196				1.51196			1.51196					1.51196			1.51196	2.10814
Phpt1	phosphohistidine phosphatase 1 (Phpt1), mRNA.	3.11971	-1.92766		3.11971	-1.92766		NM_001106558	---	---	NM_001106558 // Phpt1 // phosphohistidine phosphatase 1 // 3p13 // 296571 /// ENSRNOT00000022495 // Phpt1 // phosphohistidine phosphatase 1 // 3p13 // 296571	NM_001106558 // RefSeq // Rattus norvegicus phosphohistidine phosphatase 1 (Phpt1), mRNA. // chr3 // 100 // 100 // 25 // 25 // 0 /// ENSRNOT00000022495 // ENSEMBL // phosphohistidine phosphatase 1 gene:ENSRNOG00000016723 // chr3 // 100 // 100 // 25 // 25 // 0	---	---	---	---	1.98888			1.50739				1.50739			1.50739					1.50739			1.50739	1.74813
mrpl11	mitochondrial ribosomal protein L11 (mrpl11), nuclear gene encoding mitochondrial protein, mRNA.	1.53167	-1.92524			-1.92524		NM_001006973	---	---	NM_001006973 // mrpl11 // mitochondrial ribosomal protein L11 // 1q43 // 293666 /// ENSRNOT00000027091 // mrpl11 // mitochondrial ribosomal protein L11 // 1q43 // 293666 /// BC083740 // mrpl11 // mitochondrial ribosomal protein L11 // 1q43 // 293666 /// ENSRNOT00000068696 // mrpl11 // mitochondrial ribosomal protein L11 // 1q43 // 293666	NM_001006973 // RefSeq // Rattus norvegicus mitochondrial ribosomal protein L11 (mrpl11), nuclear gene encoding mitochondrial protein, mRNA. // chr1 // 100 // 90 // 26 // 26 // 0 /// ENSRNOT00000027091 // ENSEMBL // 39S ribosomal protein L11, mitochondrial gene:ENSRNOG00000019970 // chr1 // 100 // 90 // 26 // 26 // 0 /// BC083740 // GenBank // Rattus norvegicus mitochondrial ribosomal protein L11…	NM_001006973 // GO:0006412 // translation // inferred from electronic annotation /// ENSRNOT00000027091 // GO:0006412 // translation // inferred from electronic annotation /// BC083740 // GO:0006412 // translation // inferred from electronic annotation /// ENSRNOT00000068696 // GO:0006412 // translation // inferred from electronic annotation	NM_001006973 // GO:0005739 // mitochondrion // inferred from electronic annotation /// NM_001006973 // GO:0005739 // mitochondrion // not recorded /// NM_001006973 // GO:0005762 // mitochondrial large ribosomal subunit // inferred from electronic annotation /// NM_001006973 // GO:0005762 // mitochondrial large ribosomal subunit // not recorded /// NM_001006973 // GO:0005840 // ribosome // inferre…	NM_001006973 // GO:0003735 // structural constituent of ribosome // inferred from electronic annotation /// ENSRNOT00000027091 // GO:0003735 // structural constituent of ribosome // inferred from electronic annotation /// BC083740 // GO:0003735 // structural constituent of ribosome // inferred from electronic annotation /// ENSRNOT00000068696 // GO:0003735 // structural constituent of ribosome //…	---	2.80729																			2.80729
Nop16	NOP16 nucleolar protein homolog (yeast) (Nop16), mRNA.	2.46995	-1.91484		2.46995	-1.91484		NM_001047095	---	---	NM_001047095 // Nop16 // NOP16 nucleolar protein homolog (yeast) // 17p14 // 306768 /// ENSRNOT00000023320 // Nop16 // NOP16 nucleolar protein homolog (yeast) // 17p14 // 306768 /// AB256043 // Nop16 // NOP16 nucleolar protein homolog (yeast) // 17p14 // 306768	NM_001047095 // RefSeq // Rattus norvegicus NOP16 nucleolar protein homolog (yeast) (Nop16), mRNA. // chr17 // 100 // 100 // 20 // 20 // 0 /// ENSRNOT00000023320 // ENSEMBL // Nucleolar protein 16 gene:ENSRNOG00000017284 // chr17 // 100 // 100 // 20 // 20 // 0 /// AB256043 // GenBank // Rattus norvegicus ZH1 mRNA, complete cds. // chr17 // 100 // 100 // 20 // 20 // 0	---	NM_001047095 // GO:0005634 // nucleus // inferred from electronic annotation /// NM_001047095 // GO:0005730 // nucleolus // inferred from electronic annotation /// ENSRNOT00000023320 // GO:0005634 // nucleus // inferred from electronic annotation /// ENSRNOT00000023320 // GO:0005730 // nucleolus // inferred from electronic annotation /// AB256043 // GO:0005634 // nucleus // inferred from electron…	---	---			-1.50288			-1.51474	-1.7394	-1.58567			-1.61327					-1.61327	-1.55188	-1.50562	-1.55692	-1.5629
Tmem14c	transmembrane protein 14C (Tmem14c), transcript variant 1, mRNA.	2.71973	-1.90985		2.3281	-1.90985		NM_134395	---	---	NM_134395 // Tmem14c // transmembrane protein 14C // 17p12 // 171432 /// NM_001135169 // Tmem14c // transmembrane protein 14C // 17p12 // 171432 /// ENSRNOT00000020737 // Tmem14c // transmembrane protein 14C // 17p12 // 171432 /// ENSRNOT00000066371 // Tmem14c // transmembrane protein 14C // 17p12 // 171432 /// BC158854 // Tmem14c // transmembrane protein 14C // 17p12 // 171432	NM_134395 // RefSeq // Rattus norvegicus transmembrane protein 14C (Tmem14c), transcript variant 1, mRNA. // chr17 // 100 // 97 // 34 // 34 // 0 /// NM_001135169 // RefSeq // Rattus norvegicus transmembrane protein 14C (Tmem14c), transcript variant 2, mRNA. // chr17 // 100 // 86 // 30 // 30 // 0 /// ENSRNOT00000020737 // ENSEMBL // transmembrane protein 14C gene:ENSRNOG00000015437 // chr17 // 100…	NM_134395 // GO:0006783 // heme biosynthetic process // inferred from electronic annotation /// NM_001135169 // GO:0006783 // heme biosynthetic process // inferred from electronic annotation /// ENSRNOT00000020737 // GO:0006783 // heme biosynthetic process // inferred from electronic annotation /// ENSRNOT00000066371 // GO:0006783 // heme biosynthetic process // inferred from electronic annotatio…	NM_134395 // GO:0005739 // mitochondrion // inferred from electronic annotation /// NM_134395 // GO:0005739 // mitochondrion // not recorded /// NM_134395 // GO:0016020 // membrane // inferred from electronic annotation /// NM_134395 // GO:0016021 // integral to membrane // inferred from electronic annotation /// NM_134395 // GO:0031966 // mitochondrial membrane // inferred from electronic annota…	---	---
Hsd17b10	hydroxysteroid (17-beta) dehydrogenase 10 (Hsd17b10), nuclear gene encoding mitochondrial protein, mRNA.	3.77827	-1.90425	1.98413	3.77827	-1.90425	1.98413	NM_031682	---	---	NM_031682 // Hsd17b10 // hydroxysteroid (17-beta) dehydrogenase 10 // Xq21 // 63864 /// ENSRNOT00000043559 // Hsd17b10 // hydroxysteroid (17-beta) dehydrogenase 10 // Xq21 // 63864 /// AF069770 // Hsd17b10 // hydroxysteroid (17-beta) dehydrogenase 10 // Xq21 // 63864	NM_031682 // RefSeq // Rattus norvegicus hydroxysteroid (17-beta) dehydrogenase 10 (Hsd17b10), nuclear gene encoding mitochondrial protein, mRNA. // chrX // 96 // 100 // 26 // 27 // 0 /// ENSRNOT00000043559 // ENSEMBL // 3-hydroxyacyl-CoA dehydrogenase type-2 gene:ENSRNOG00000003049 // chrX // 100 // 100 // 27 // 27 // 0 /// AF069770 // GenBank // Rattus norvegicus 17beta-hydroxysteroid dehydroge…	NM_031682 // GO:0007569 // cell aging // inferred from expression pattern /// NM_031682 // GO:0008033 // tRNA processing // inferred from electronic annotation /// NM_031682 // GO:0033327 // Leydig cell differentiation // inferred from expression pattern /// NM_031682 // GO:0051289 // protein homotetramerization // inferred from direct assay /// NM_031682 // GO:0055114 // oxidation reduction // i…	NM_031682 // GO:0005739 // mitochondrion // inferred from direct assay /// NM_031682 // GO:0005739 // mitochondrion // not recorded /// NM_031682 // GO:0005739 // mitochondrion // inferred from sequence or structural similarity /// NM_031682 // GO:0005743 // mitochondrial inner membrane // inferred from electronic annotation /// NM_031682 // GO:0005743 // mitochondrial inner membrane // not recor…	NM_031682 // GO:0001540 // beta-amyloid binding // inferred from direct assay /// NM_031682 // GO:0003857 // 3-hydroxyacyl-CoA dehydrogenase activity // inferred from electronic annotation /// NM_031682 // GO:0004303 // estradiol 17-beta-dehydrogenase activity // inferred from direct assay /// NM_031682 // GO:0005496 // steroid binding // inferred from direct assay /// NM_031682 // GO:0005515 // …	---
Abcb7	ATP-binding cassette, sub-family B (MDR/TAP), member 7 (Abcb7), nuclear gene encoding mitochondrial protein, mRNA.	2.8333	-1.9		2.8333			NM_212518	---	---	NM_212518 // Abcb7 // ATP-binding cassette, sub-family B (MDR/TAP), member 7 // Xq31 // 302395 /// ENSRNOT00000003739 // Abcb7 // ATP-binding cassette, sub-family B (MDR/TAP), member 7 // Xq31 // 302395	NM_212518 // RefSeq // Rattus norvegicus ATP-binding cassette, sub-family B (MDR/TAP), member 7 (Abcb7), nuclear gene encoding mitochondrial protein, mRNA. // chrX // 97 // 100 // 29 // 30 // 0 /// ENSRNOT00000003739 // ENSEMBL // ATP-binding cassette sub-family B member 7, mitochondrial gene:ENSRNOG00000002790 // chrX // 100 // 93 // 28 // 28 // 0	NM_212518 // GO:0006879 // cellular iron ion homeostasis // inferred from electronic annotation /// NM_212518 // GO:0008150 // biological_process // no biological data available /// NM_212518 // GO:0055085 // transmembrane transport // inferred from electronic annotation /// ENSRNOT00000003739 // GO:0006879 // cellular iron ion homeostasis // inferred from electronic annotation /// ENSRNOT0000000…	NM_212518 // GO:0005575 // cellular_component // no biological data available /// NM_212518 // GO:0005739 // mitochondrion // inferred from electronic annotation /// NM_212518 // GO:0005743 // mitochondrial inner membrane // inferred from electronic annotation /// NM_212518 // GO:0016020 // membrane // inferred from electronic annotation /// NM_212518 // GO:0016021 // integral to membrane // infe…	NM_212518 // GO:0000166 // nucleotide binding // inferred from electronic annotation /// NM_212518 // GO:0003674 // molecular_function // no biological data available /// NM_212518 // GO:0005524 // ATP binding // inferred from electronic annotation /// NM_212518 // GO:0016887 // ATPase activity // inferred from electronic annotation /// NM_212518 // GO:0042626 // ATPase activity, coupled to trans…	---										-1.63653										-1.63653
Adprhl1	ADP-ribosylhydrolase like 1 (Adprhl1), mRNA.	3.76384	-1.9		3.76384			NM_001013054	---	---	NM_001013054 // Adprhl1 // ADP-ribosylhydrolase like 1 // 16q12.5 // 290880 /// ENSRNOT00000057740 // Grtp1 // growth hormone regulated TBC protein 1 // 16q12.5 // 361180 /// BC083773 // Adprhl1 // ADP-ribosylhydrolase like 1 // 16q12.5 // 290880 /// ENSRNOT00000026392 // Grtp1 // growth hormone regulated TBC protein 1 // 16q12.5 // 361180 /// ENSRNOT00000042090 // Grtp1 // growth hormone regulat…	NM_001013054 // RefSeq // Rattus norvegicus ADP-ribosylhydrolase like 1 (Adprhl1), mRNA. // chr16 // 100 // 100 // 32 // 32 // 0 /// ENSRNOT00000057740 // ENSEMBL // Growth hormone-regulated TBC protein 1 gene:ENSRNOG00000019504 // chr16 // 100 // 59 // 19 // 19 // 0 /// BC083773 // GenBank // Rattus norvegicus ADP-ribosylhydrolase like 1, mRNA (cDNA clone MGC:94724 IMAGE:7193406), complete cds. …	NM_001013054 // GO:0032313 // regulation of Rab GTPase activity // inferred from electronic annotation /// NM_001013054 // GO:0051725 // protein de-ADP-ribosylation // inferred from electronic annotation /// ENSRNOT00000057740 // GO:0032313 // regulation of Rab GTPase activity // inferred from electronic annotation /// BC083773 // GO:0032313 // regulation of Rab GTPase activity // inferred from e…	NM_001013054 // GO:0005622 // intracellular // inferred from electronic annotation /// ENSRNOT00000057740 // GO:0005622 // intracellular // inferred from electronic annotation /// BC083773 // GO:0005622 // intracellular // inferred from electronic annotation /// ENSRNOT00000026392 // GO:0005622 // intracellular // inferred from electronic annotation /// ENSRNOT00000042090 // GO:0005622 // intrace…	NM_001013054 // GO:0000287 // magnesium ion binding // inferred from electronic annotation /// NM_001013054 // GO:0003875 // ADP-ribosylarginine hydrolase activity // inferred from electronic annotation /// NM_001013054 // GO:0005097 // Rab GTPase activator activity // inferred from electronic annotation /// NM_001013054 // GO:0016787 // hydrolase activity // inferred from electronic annotation /…	---		1.52898		1.54052				1.53475			1.53475					1.53475			1.53475	1.53475
Asnsd1	asparagine synthetase domain containing 1 (Asnsd1), mRNA.	3.90645	-1.9		3.90645			NM_001106763	---	---	NM_001106763 // Asnsd1 // asparagine synthetase domain containing 1 // 9q22 // 299507 /// ENSRNOT00000059233 // Asnsd1 // asparagine synthetase domain containing 1 // 9q22 // 299507	NM_001106763 // RefSeq // Rattus norvegicus asparagine synthetase domain containing 1 (Asnsd1), mRNA. // chr9 // 100 // 100 // 26 // 26 // 0 /// ENSRNOT00000059233 // ENSEMBL // Uncharacterized protein gene:ENSRNOG00000003942 // chr9 // 100 // 100 // 26 // 26 // 0	NM_001106763 // GO:0006529 // asparagine biosynthetic process // inferred from electronic annotation /// ENSRNOT00000059233 // GO:0006529 // asparagine biosynthetic process // inferred from electronic annotation	---	NM_001106763 // GO:0004066 // asparagine synthase (glutamine-hydrolyzing) activity // inferred from electronic annotation /// ENSRNOT00000059233 // GO:0004066 // asparagine synthase (glutamine-hydrolyzing) activity // inferred from electronic annotation	---
Bccip	BRCA2 and CDKN1A interacting protein (Bccip), mRNA.	2.56036	-1.9		2.56036			NM_001108505	---	---	NM_001108505 // Bccip // BRCA2 and CDKN1A interacting protein // 1q41 // 361666 /// NM_001130039 // Dhx32 // DEAH (Asp-Glu-Ala-His) box polypeptide 32 // 1q41 // 361667 /// ENSRNOT00000024355 // Bccip // BRCA2 and CDKN1A interacting protein // 1q41 // 361666 /// ENSRNOT00000024655 // Dhx32 // DEAH (Asp-Glu-Ala-His) box polypeptide 32 // 1q41 // 361667	NM_001108505 // RefSeq // Rattus norvegicus BRCA2 and CDKN1A interacting protein (Bccip), mRNA. // chr1 // 100 // 29 // 8 // 8 // 0 /// NM_001130039 // RefSeq // Rattus norvegicus DEAH (Asp-Glu-Ala-His) box polypeptide 32 (Dhx32), mRNA. // chr1 // 100 // 14 // 4 // 4 // 0 /// ENSRNOT00000024355 // ENSEMBL // Uncharacterized protein gene:ENSRNOG00000018066 // chr1 // 100 // 100 // 28 // 28 // 0 //…	NM_001108505 // GO:0000079 // regulation of cyclin-dependent protein kinase activity // not recorded /// ENSRNOT00000024355 // GO:0000079 // regulation of cyclin-dependent protein kinase activity // not recorded	NM_001108505 // GO:0019908 // nuclear cyclin-dependent protein kinase holoenzyme complex // not recorded /// ENSRNOT00000024355 // GO:0019908 // nuclear cyclin-dependent protein kinase holoenzyme complex // not recorded	NM_001108505 // GO:0005515 // protein binding // not recorded /// NM_001108505 // GO:0019207 // kinase regulator activity // not recorded /// NM_001130039 // GO:0004386 // helicase activity // inferred from electronic annotation /// ENSRNOT00000024355 // GO:0005515 // protein binding // not recorded /// ENSRNOT00000024355 // GO:0019207 // kinase regulator activity // not recorded /// ENSRNOT00000…	---	4.88985																			4.88985
Fam162a	family with sequence similarity 162, member A (Fam162a), mRNA.	3.72145	-1.9		3.72145			NM_001029903	---	---	NM_001029903 // Fam162a // family with sequence similarity 162, member A // 11q22 // 360721 /// BC097971 // Fam162a // family with sequence similarity 162, member A // 11q22 // 360721 /// ENSRNOT00000043230 // Fam162a // family with sequence similarity 162, member A // 11q22 // 360721 /// ENSRNOT00000003069 // Fam162a // family with sequence similarity 162, member A // 11q22 // 360721 /// ENSRNOT…	NM_001029903 // RefSeq // Rattus norvegicus family with sequence similarity 162, member A (Fam162a), mRNA. // chr11 // 100 // 70 // 14 // 14 // 0 /// BC097971 // GenBank // Rattus norvegicus family with sequence similarity 162, member A, mRNA (cDNA clone MGC:116101 IMAGE:7442058), complete cds. // chr11 // 100 // 90 // 18 // 18 // 0 /// ENSRNOT00000043230 // ENSEMBL // Protein FAM162A gene:ENSRNO…	---	NM_001029903 // GO:0005739 // mitochondrion // not recorded /// NM_001029903 // GO:0016020 // membrane // inferred from electronic annotation /// NM_001029903 // GO:0016021 // integral to membrane // inferred from electronic annotation /// BC097971 // GO:0005739 // mitochondrion // not recorded /// BC097971 // GO:0016020 // membrane // inferred from electronic annotation /// BC097971 // GO:001602…	---	---		1.83121	1.77454	1.66725	2.11876	1.59252	1.72128	1.78426			1.8042					1.8042			1.8042	1.78426
Gtf2h5	general transcription factor IIH, polypeptide 5 (Gtf2h5), mRNA.	3.92315	-1.9		3.92315			NM_001126088	---	---	NM_001126088 // Gtf2h5 // general transcription factor IIH, polypeptide 5 // 1q11 // 502227 /// ENSRNOT00000024211 // Gtf2h5 // general transcription factor IIH, polypeptide 5 // 1q11 // 502227	NM_001126088 // RefSeq // Rattus norvegicus general transcription factor IIH, polypeptide 5 (Gtf2h5), mRNA. // chr1 // 100 // 88 // 22 // 22 // 0 /// ENSRNOT00000024211 // ENSEMBL // Uncharacterized protein gene:ENSRNOG00000018007 // chr1 // 100 // 88 // 22 // 22 // 0	NM_001126088 // GO:0006289 // nucleotide-excision repair // inferred from electronic annotation /// ENSRNOT00000024211 // GO:0006289 // nucleotide-excision repair // inferred from electronic annotation	---	NM_001126088 // GO:0003677 // DNA binding // inferred from electronic annotation /// ENSRNOT00000024211 // GO:0003677 // DNA binding // inferred from electronic annotation	---		1.50718			1.51245			1.50982			1.51113		1.69879		2.00655	1.73882			1.81472	1.68124
Klhl31	kelch-like 31 (Drosophila) (Klhl31), mRNA.	1.61567	-1.9	3.03138	5.69607		3.03138	NM_001108170	---	---	NM_001108170 // Klhl31 // kelch-like 31 (Drosophila) // 8q31 // 315833 /// ENSRNOT00000008244 // Klhl31 // kelch-like 31 (Drosophila) // 8q31 // 315833	NM_001108170 // RefSeq // Rattus norvegicus kelch-like 31 (Drosophila) (Klhl31), mRNA. // chr8 // 100 // 100 // 25 // 25 // 0 /// ENSRNOT00000008244 // ENSEMBL // Uncharacterized protein gene:ENSRNOG00000006224 // chr8 // 100 // 100 // 25 // 25 // 0	---	---	NM_001108170 // GO:0005515 // protein binding // inferred from electronic annotation /// ENSRNOT00000008244 // GO:0005515 // protein binding // inferred from electronic annotation	---
Lage3	L antigen family, member 3 (Lage3), mRNA.	2.81357	-1.9		2.81357			NM_001106345	---	---	NM_001106345 // Lage3 // L antigen family, member 3 // Xq37 // 293863 /// ENSRNOT00000056312 // Lage3 // L antigen family, member 3 // Xq37 // 293863	NM_001106345 // RefSeq // Rattus norvegicus L antigen family, member 3 (Lage3), mRNA. // chrX // 100 // 100 // 26 // 26 // 0 /// ENSRNOT00000056312 // ENSEMBL // Uncharacterized protein gene:ENSRNOG00000037249 // chrX // 100 // 100 // 26 // 26 // 0	---	---	NM_001106345 // GO:0005515 // protein binding // not recorded /// ENSRNOT00000056312 // GO:0005515 // protein binding // not recorded	---
Lsm3	LSM3 homolog, U6 small nuclear RNA associated (S. cerevisiae) (Lsm3), mRNA.	2.47779	-1.9		2.47779			NM_001106611	---	---	NM_001106611 // Lsm3 // LSM3 homolog, U6 small nuclear RNA associated (S. cerevisiae) // 4q34 // 297455 /// ENSRNOT00000011557 // Lsm3 // LSM3 homolog, U6 small nuclear RNA associated (S. cerevisiae) // 4q34 // 297455	NM_001106611 // RefSeq // Rattus norvegicus LSM3 homolog, U6 small nuclear RNA associated (S. cerevisiae) (Lsm3), mRNA. // chr4 // 100 // 100 // 23 // 23 // 0 /// ENSRNOT00000011557 // ENSEMBL // Uncharacterized protein gene:ENSRNOG00000008733 // chr4 // 100 // 100 // 23 // 23 // 0	---	---	NM_001106611 // GO:0005515 // protein binding // not recorded /// ENSRNOT00000011557 // GO:0005515 // protein binding // not recorded	---										-1.60365										-1.60365
Mospd1	motile sperm domain containing 1 (Mospd1), mRNA.	4.26406	-1.9		3.88457			NM_001014107	---	---	NM_001014107 // Mospd1 // motile sperm domain containing 1 // Xq36 // 317312 /// ENSRNOT00000011995 // Mospd1 // motile sperm domain containing 1 // Xq36 // 317312 /// ENSRNOT00000003192 // Mospd1 // motile sperm domain containing 1 // Xq36 // 317312 /// BC086521 // Mospd1 // motile sperm domain containing 1 // Xq36 // 317312	NM_001014107 // RefSeq // Rattus norvegicus motile sperm domain containing 1 (Mospd1), mRNA. // chrX // 100 // 97 // 37 // 37 // 0 /// ENSRNOT00000011995 // ENSEMBL // Motile sperm domain-containing protein 1 gene:ENSRNOG00000008840 // chrX // 100 // 97 // 37 // 37 // 0 /// ENSRNOT00000003192 // ENSEMBL // Motile sperm domain-containing protein 1 gene:ENSRNOG00000002332 // chrX // 100 // 71 // 27…	---	NM_001014107 // GO:0016020 // membrane // inferred from electronic annotation /// NM_001014107 // GO:0016021 // integral to membrane // inferred from electronic annotation /// ENSRNOT00000011995 // GO:0016020 // membrane // inferred from electronic annotation /// ENSRNOT00000011995 // GO:0016021 // integral to membrane // inferred from electronic annotation /// ENSRNOT00000003192 // GO:0016020 //…	NM_001014107 // GO:0005198 // structural molecule activity // inferred from electronic annotation /// ENSRNOT00000011995 // GO:0005198 // structural molecule activity // inferred from electronic annotation /// ENSRNOT00000003192 // GO:0005198 // structural molecule activity // inferred from electronic annotation /// BC086521 // GO:0005198 // structural molecule activity // inferred from electroni…	---															1.89791					1.89791
Mrpl23	mitochondrial ribosomal protein L23 (Mrpl23), nuclear gene encoding mitochondrial protein, mRNA.	2.11081	-1.9		2.11081			NM_022529	---	---	NM_022529 // Mrpl23 // mitochondrial ribosomal protein L23 // 1q41 // 64360 /// ENSRNOT00000027585 // Mrpl23 // mitochondrial ribosomal protein L23 // 1q41 // 64360 /// U62635 // Mrpl23 // mitochondrial ribosomal protein L23 // 1q41 // 64360	NM_022529 // RefSeq // Rattus norvegicus mitochondrial ribosomal protein L23 (Mrpl23), nuclear gene encoding mitochondrial protein, mRNA. // chr1 // 100 // 100 // 25 // 25 // 0 /// ENSRNOT00000027585 // ENSEMBL // 39S ribosomal protein L23, mitochondrial gene:ENSRNOG00000020354 // chr1 // 100 // 100 // 25 // 25 // 0 /// U62635 // GenBank // Rattus norvegicus ribosomal protein L23-related product …	NM_022529 // GO:0006412 // translation // inferred from electronic annotation /// ENSRNOT00000027585 // GO:0006412 // translation // inferred from electronic annotation /// U62635 // GO:0006412 // translation // inferred from electronic annotation	NM_022529 // GO:0005622 // intracellular // inferred from electronic annotation /// NM_022529 // GO:0005739 // mitochondrion // inferred from electronic annotation /// NM_022529 // GO:0005739 // mitochondrion // not recorded /// NM_022529 // GO:0005762 // mitochondrial large ribosomal subunit // not recorded /// NM_022529 // GO:0005840 // ribosome // inferred from electronic annotation /// ENSRNO…	NM_022529 // GO:0000166 // nucleotide binding // inferred from electronic annotation /// NM_022529 // GO:0003735 // structural constituent of ribosome // inferred from electronic annotation /// ENSRNOT00000027585 // GO:0000166 // nucleotide binding // inferred from electronic annotation /// ENSRNOT00000027585 // GO:0003735 // structural constituent of ribosome // inferred from electronic annotati…	---
Mrps17	mitochondrial ribosomal protein S17 (Mrps17), nuclear gene encoding mitochondrial protein, mRNA.	3.39433	-1.9		3.39433			NM_001105923	---	---	NM_001105923 // Mrps17 // mitochondrial ribosomal protein S17 // 12q13 // 288621 /// ENSRNOT00000001229 // Mrps17 // mitochondrial ribosomal protein S17 // 12q13 // 288621 /// ENSRNOT00000043644 // Mrps17 // mitochondrial ribosomal protein S17 // 12q13 // 288621	NM_001105923 // RefSeq // Rattus norvegicus mitochondrial ribosomal protein S17 (Mrps17), nuclear gene encoding mitochondrial protein, mRNA. // chr12 // 100 // 100 // 22 // 22 // 0 /// ENSRNOT00000001229 // ENSEMBL // Uncharacterized protein gene:ENSRNOG00000000926 // chr12 // 100 // 100 // 22 // 22 // 0 /// ENSRNOT00000043644 // ENSEMBL // Uncharacterized protein gene:ENSRNOG00000000926 // chr12…	NM_001105923 // GO:0006412 // translation // inferred from electronic annotation /// NM_001105923 // GO:0055085 // transmembrane transport // inferred from electronic annotation /// ENSRNOT00000001229 // GO:0006412 // translation // inferred from electronic annotation /// ENSRNOT00000001229 // GO:0055085 // transmembrane transport // inferred from electronic annotation /// ENSRNOT00000043644 // G…	NM_001105923 // GO:0005622 // intracellular // inferred from electronic annotation /// NM_001105923 // GO:0005739 // mitochondrion // not recorded /// NM_001105923 // GO:0005840 // ribosome // inferred from electronic annotation /// NM_001105923 // GO:0016020 // membrane // inferred from electronic annotation /// ENSRNOT00000001229 // GO:0005622 // intracellular // inferred from electronic annota…	NM_001105923 // GO:0003735 // structural constituent of ribosome // inferred from electronic annotation /// NM_001105923 // GO:0005488 // binding // inferred from electronic annotation /// ENSRNOT00000001229 // GO:0003735 // structural constituent of ribosome // inferred from electronic annotation /// ENSRNOT00000001229 // GO:0005488 // binding // inferred from electronic annotation /// ENSRNOT00…	---
Mtx2	metaxin 2 (Mtx2), nuclear gene encoding mitochondrial protein, mRNA.	2.70329	-1.9		2.70329			NM_001008286	---	---	NM_001008286 // Mtx2 // metaxin 2 // 3q23 // 288150 /// ENSRNOT00000002134 // Mtx2 // metaxin 2 // 3q23 // 288150 /// BC086360 // Mtx2 // metaxin 2 // 3q23 // 288150	NM_001008286 // RefSeq // Rattus norvegicus metaxin 2 (Mtx2), nuclear gene encoding mitochondrial protein, mRNA. // chr3 // 100 // 100 // 29 // 29 // 0 /// ENSRNOT00000002134 // ENSEMBL // Metaxin 2 gene:ENSRNOG00000001559 // chr3 // 100 // 100 // 29 // 29 // 0 /// BC086360 // GenBank // Rattus norvegicus metaxin 2, mRNA (cDNA clone MGC:106000 IMAGE:7303884), complete cds. // chr3 // 100 // 100 /…	---	NM_001008286 // GO:0005739 // mitochondrion // inferred from electronic annotation /// NM_001008286 // GO:0005739 // mitochondrion // not recorded /// ENSRNOT00000002134 // GO:0005739 // mitochondrion // inferred from electronic annotation /// ENSRNOT00000002134 // GO:0005739 // mitochondrion // not recorded /// BC086360 // GO:0005739 // mitochondrion // inferred from electronic annotation /// BC…	---	---		1.5517						1.5517			1.5517					1.5517			1.5517	1.5517
Ndufb6	NADH dehydrogenase (ubiquinone) 1 beta subcomplex, 6 (Ndufb6), nuclear gene encoding mitochondrial protein, mRNA.	5.60434	-1.9	2.91984	5.60434		2.91984	NM_001106646	---	---	NM_001106646 // Ndufb6 // NADH dehydrogenase (ubiquinone) 1 beta subcomplex, 6 // 5q22 // 297990 /// ENSRNOT00000029712 // Ndufb6 // NADH dehydrogenase (ubiquinone) 1 beta subcomplex, 6 // 5q22 // 297990 /// ENSRNOT00000066438 // Ndufb6 // NADH dehydrogenase (ubiquinone) 1 beta subcomplex, 6 // 5q22 // 297990	NM_001106646 // RefSeq // Rattus norvegicus NADH dehydrogenase (ubiquinone) 1 beta subcomplex, 6 (Ndufb6), nuclear gene encoding mitochondrial protein, mRNA. // chr5 // 100 // 100 // 18 // 18 // 0 /// ENSRNOT00000029712 // ENSEMBL // Uncharacterized protein gene:ENSRNOG00000024539 // chr5 // 100 // 100 // 18 // 18 // 0 /// ENSRNOT00000066438 // ENSEMBL // Uncharacterized protein gene:ENSRNOG00000…	NM_001106646 // GO:0008150 // biological_process // no biological data available /// ENSRNOT00000029712 // GO:0008150 // biological_process // no biological data available /// ENSRNOT00000066438 // GO:0008150 // biological_process // no biological data available	NM_001106646 // GO:0005575 // cellular_component // no biological data available /// NM_001106646 // GO:0005739 // mitochondrion // not recorded /// NM_001106646 // GO:0005747 // mitochondrial respiratory chain complex I // not recorded /// NM_001106646 // GO:0031966 // mitochondrial membrane // not recorded /// ENSRNOT00000029712 // GO:0005575 // cellular_component // no biological data availabl…	NM_001106646 // GO:0003674 // molecular_function // no biological data available /// ENSRNOT00000029712 // GO:0003674 // molecular_function // no biological data available /// ENSRNOT00000066438 // GO:0003674 // molecular_function // no biological data available	---
Ndufs8	NADH dehydrogenase (ubiquinone) Fe-S protein 8 (Ndufs8), mRNA.	2.48826	-1.9		2.48826			NM_001106322	---	---	NM_001106322 // Ndufs8 // NADH dehydrogenase (ubiquinone) Fe-S protein 8 // 1q42 // 293652 /// ENSRNOT00000023526 // Ndufs8 // NADH dehydrogenase (ubiquinone) Fe-S protein 8 // 1q42 // 293652 /// BC158791 // Ndufs8 // NADH dehydrogenase (ubiquinone) Fe-S protein 8 // 1q42 // 293652	NM_001106322 // RefSeq // Rattus norvegicus NADH dehydrogenase (ubiquinone) Fe-S protein 8 (Ndufs8), nuclear gene encoding mitochondrial protein, mRNA. // chr1 // 100 // 100 // 28 // 28 // 0 /// ENSRNOT00000023526 // ENSEMBL // Ndufs8 protein gene:ENSRNOG00000017446 // chr1 // 100 // 100 // 28 // 28 // 0 /// BC158791 // GenBank // Rattus norvegicus NADH dehydrogenase (ubiquinone) Fe-S protein 8, …	NM_001106322 // GO:0006979 // response to oxidative stress // inferred from electronic annotation /// NM_001106322 // GO:0006979 // response to oxidative stress // not recorded /// NM_001106322 // GO:0008150 // biological_process // no biological data available /// NM_001106322 // GO:0019684 // photosynthesis, light reaction // inferred from electronic annotation /// NM_001106322 // GO:0032981 //…	NM_001106322 // GO:0005575 // cellular_component // no biological data available /// NM_001106322 // GO:0005739 // mitochondrion // inferred from electronic annotation /// NM_001106322 // GO:0005739 // mitochondrion // not recorded /// NM_001106322 // GO:0005747 // mitochondrial respiratory chain complex I // inferred from electronic annotation /// NM_001106322 // GO:0005747 // mitochondrial resp…	NM_001106322 // GO:0003674 // molecular_function // no biological data available /// NM_001106322 // GO:0003954 // NADH dehydrogenase activity // inferred from electronic annotation /// NM_001106322 // GO:0003954 // NADH dehydrogenase activity // not recorded /// NM_001106322 // GO:0005506 // iron ion binding // inferred from electronic annotation /// NM_001106322 // GO:0008137 // NADH dehydrogen…	---							1.51678	1.51678			1.51678					1.51678			1.51678	1.51678
Pebp1	phosphatidylethanolamine binding protein 1 (Pebp1), mRNA.	2.58479	-1.9		2.58479			NM_017236	---	---	NM_017236 // Pebp1 // phosphatidylethanolamine binding protein 1 // 12q16 // 29542 /// ENSRNOT00000001500 // Pebp1 // phosphatidylethanolamine binding protein 1 // 12q16 // 29542 /// BC063171 // Pebp1 // phosphatidylethanolamine binding protein 1 // 12q16 // 29542	NM_017236 // RefSeq // Rattus norvegicus phosphatidylethanolamine binding protein 1 (Pebp1), mRNA. // chr12 // 100 // 100 // 20 // 20 // 0 /// ENSRNOT00000001500 // ENSEMBL // Phosphatidylethanolamine-binding protein 1 gene:ENSRNOG00000001136 // chr12 // 100 // 100 // 20 // 20 // 0 /// BC063171 // GenBank // Rattus norvegicus phosphatidylethanolamine binding protein 1, mRNA (cDNA clone MGC:72882 …	NM_017236 // GO:0000165 // MAPKKK cascade // inferred from direct assay /// NM_017236 // GO:0001505 // regulation of neurotransmitter levels // inferred from direct assay /// NM_017236 // GO:0001933 // negative regulation of protein phosphorylation // inferred from mutant phenotype /// NM_017236 // GO:0002026 // regulation of the force of heart contraction // inferred from direct assay /// NM_017…	NM_017236 // GO:0005615 // extracellular space // inferred from direct assay /// NM_017236 // GO:0005625 // soluble fraction // inferred from direct assay /// NM_017236 // GO:0005737 // cytoplasm // inferred from direct assay /// NM_017236 // GO:0005739 // mitochondrion // inferred from direct assay /// NM_017236 // GO:0005741 // mitochondrial outer membrane // inferred from direct assay /// NM_0…	NM_017236 // GO:0000166 // nucleotide binding // inferred from electronic annotation /// NM_017236 // GO:0004867 // serine-type endopeptidase inhibitor activity // inferred from electronic annotation /// NM_017236 // GO:0005102 // receptor binding // inferred from direct assay /// NM_017236 // GO:0005515 // protein binding // not recorded /// NM_017236 // GO:0005524 // ATP binding // inferred fro…	---
Pgam2	phosphoglycerate mutase 2 (muscle) (Pgam2), mRNA.	2.4	-1.9		2.44885	-1.86397		NM_017328	---	---	NM_017328 // Pgam2 // phosphoglycerate mutase 2 (muscle) // 14q21-q22 // 24959 /// ENSRNOT00000018227 // Pgam2 // phosphoglycerate mutase 2 (muscle) // 14q21-q22 // 24959 /// M31835 // Pgam2 // phosphoglycerate mutase 2 (muscle) // 14q21-q22 // 24959	NM_017328 // RefSeq // Rattus norvegicus phosphoglycerate mutase 2 (muscle) (Pgam2), mRNA. // chr14 // 96 // 100 // 26 // 27 // 0 /// ENSRNOT00000018227 // ENSEMBL // Phosphoglycerate mutase 2 gene:ENSRNOG00000013532 // chr14 // 100 // 100 // 27 // 27 // 0 /// M31835 // GenBank // Rat phosphoglycerate mutase (PGAM-M) mRNA, complete cds. // chr14 // 96 // 100 // 26 // 27 // 0	NM_017328 // GO:0006094 // gluconeogenesis // inferred from direct assay /// NM_017328 // GO:0006096 // glycolysis // inferred from electronic annotation /// NM_017328 // GO:0006096 // glycolysis // not recorded /// NM_017328 // GO:0006941 // striated muscle contraction // inferred from electronic annotation /// NM_017328 // GO:0006941 // striated muscle contraction // not recorded /// NM_017328 …	NM_017328 // GO:0005575 // cellular_component // no biological data available /// NM_017328 // GO:0005625 // soluble fraction // inferred from direct assay /// NM_017328 // GO:0005634 // nucleus // inferred from direct assay /// NM_017328 // GO:0005829 // cytosol // inferred from direct assay /// ENSRNOT00000018227 // GO:0005575 // cellular_component // no biological data available /// ENSRNOT000…	NM_017328 // GO:0004082 // bisphosphoglycerate mutase activity // inferred from electronic annotation /// NM_017328 // GO:0004083 // 2,3-bisphospho-D-glycerate 2-phosphohydrolase activity // inferred from electronic annotation /// NM_017328 // GO:0004619 // phosphoglycerate mutase activity // inferred from direct assay /// NM_017328 // GO:0004619 // phosphoglycerate mutase activity // not recorde…	M31835 // GenMAPP // Glycolysis_and_Gluconeogenesis																					1.4	-1.4
Polr2j	polymerase (RNA) II (DNA directed) polypeptide J, 13.3kDa (Polr2j), mRNA.	2.25022	-1.9		2.25022			NM_001105921	---	---	NM_001105921 // Polr2j // polymerase (RNA) II (DNA directed) polypeptide J // 12q12 // 288588 /// ENSRNOT00000001941 // Polr2j // polymerase (RNA) II (DNA directed) polypeptide J // 12q12 // 288588	NM_001105921 // RefSeq // Rattus norvegicus polymerase (RNA) II (DNA directed) polypeptide J (Polr2j), mRNA. // chr12 // 100 // 100 // 25 // 25 // 0 /// ENSRNOT00000001941 // ENSEMBL // Uncharacterized protein gene:ENSRNOG00000001430 // chr12 // 100 // 100 // 25 // 25 // 0	NM_001105921 // GO:0006350 // transcription // inferred from electronic annotation /// NM_001105921 // GO:0006366 // transcription from RNA polymerase II promoter // not recorded /// NM_001105921 // GO:0006367 // transcription initiation from RNA polymerase II promoter // not recorded /// NM_001105921 // GO:0006368 // RNA elongation from RNA polymerase II promoter // not recorded /// NM_001105921…	NM_001105921 // GO:0005634 // nucleus // not recorded /// NM_001105921 // GO:0005654 // nucleoplasm // not recorded /// NM_001105921 // GO:0005665 // DNA-directed RNA polymerase II, core complex // not recorded /// ENSRNOT00000001941 // GO:0005634 // nucleus // not recorded /// ENSRNOT00000001941 // GO:0005654 // nucleoplasm // not recorded /// ENSRNOT00000001941 // GO:0005665 // DNA-directed RNA…	NM_001105921 // GO:0003677 // DNA binding // inferred from electronic annotation /// NM_001105921 // GO:0003899 // DNA-directed RNA polymerase activity // inferred from electronic annotation /// NM_001105921 // GO:0004672 // protein kinase activity // not recorded /// NM_001105921 // GO:0005515 // protein binding // not recorded /// NM_001105921 // GO:0030275 // LRR domain binding // not recorded…	---	2.30348																			2.30348
Ppif	peptidylprolyl isomerase F (cyclophilin F) (Ppif), nuclear gene encoding mitochondrial protein, mRNA.	2.41038	-1.9		2.41038			NM_172243	---	---	NM_172243 // Ppif // peptidylprolyl isomerase F // 16p16 // 282819 /// ENSRNOT00000014382 // Ppif // peptidylprolyl isomerase F // 16p16 // 282819 /// BC086977 // Ppif // peptidylprolyl isomerase F // 16p16 // 282819 /// ENSRNOT00000036077 // Ppif // peptidylprolyl isomerase F // 16p16 // 282819	NM_172243 // RefSeq // Rattus norvegicus peptidylprolyl isomerase F (Ppif), nuclear gene encoding mitochondrial protein, mRNA. // chr16 // 100 // 86 // 25 // 24 // 0 /// ENSRNOT00000014382 // ENSEMBL // Peptidyl-prolyl cis-trans isomerase F, mitochondrial gene:ENSRNOG00000010558 // chr16 // 100 // 89 // 25 // 25 // 0 /// BC086977 // GenBank // Rattus norvegicus peptidylprolyl isomerase F (cycloph…	NM_172243 // GO:0006457 // protein folding // inferred from electronic annotation /// NM_172243 // GO:0042981 // regulation of apoptosis // inferred from direct assay /// NM_172243 // GO:0046902 // regulation of mitochondrial membrane permeability // inferred from direct assay /// ENSRNOT00000014382 // GO:0006457 // protein folding // inferred from electronic annotation /// ENSRNOT00000014382 // …	NM_172243 // GO:0005739 // mitochondrion // inferred from direct assay /// NM_172243 // GO:0005739 // mitochondrion // inferred from electronic annotation /// NM_172243 // GO:0005739 // mitochondrion // not recorded /// NM_172243 // GO:0005743 // mitochondrial inner membrane // inferred from direct assay /// NM_172243 // GO:0005759 // mitochondrial matrix // inferred from direct assay /// ENSRNOT…	NM_172243 // GO:0003755 // peptidyl-prolyl cis-trans isomerase activity // inferred from direct assay /// NM_172243 // GO:0003755 // peptidyl-prolyl cis-trans isomerase activity // inferred from electronic annotation /// NM_172243 // GO:0005515 // protein binding // inferred from physical interaction /// NM_172243 // GO:0016018 // cyclosporin A binding // inferred from direct assay /// NM_172243 …	---	2.05842																			2.05842
Prdx6	peroxiredoxin 6 (Prdx6), mRNA.	4.00761	-1.9		4.00761			NM_053576	---	---	NM_053576 // Prdx6 // peroxiredoxin 6 // 13q22 // 94167 /// ENSRNOT00000034583 // Prdx6 // peroxiredoxin 6 // 13q22 // 94167 /// AF014009 // Prdx6 // peroxiredoxin 6 // 13q22 // 94167 /// ENSRNOT00000003961 // Prdx6 // peroxiredoxin 6 // 13q22 // 94167	NM_053576 // RefSeq // Rattus norvegicus peroxiredoxin 6 (Prdx6), mRNA. // chr13 // 100 // 100 // 19 // 19 // 0 /// ENSRNOT00000034583 // ENSEMBL // Peroxiredoxin-6 gene:ENSRNOG00000002896 // chr13 // 100 // 100 // 19 // 19 // 0 /// AF014009 // GenBank // Rattus norvegicus acidic calcium-independent phospholipase A2 (aiPLA2) mRNA, complete cds. // chr13 // 100 // 100 // 19 // 19 // 0 /// ENSRNOT0…	NM_053576 // GO:0000302 // response to reactive oxygen species // not recorded /// NM_053576 // GO:0006979 // response to oxidative stress // inferred from electronic annotation /// NM_053576 // GO:0006979 // response to oxidative stress // not recorded /// NM_053576 // GO:0008152 // metabolic process // not recorded /// NM_053576 // GO:0009395 // phospholipid catabolic process // inferred from e…	NM_053576 // GO:0005634 // nucleus // inferred from electronic annotation /// NM_053576 // GO:0005634 // nucleus // not recorded /// NM_053576 // GO:0005737 // cytoplasm // inferred from electronic annotation /// NM_053576 // GO:0005737 // cytoplasm // not recorded /// NM_053576 // GO:0005739 // mitochondrion // not recorded /// NM_053576 // GO:0005764 // lysosome // inferred from electronic anno…	NM_053576 // GO:0004601 // peroxidase activity // not recorded /// NM_053576 // GO:0004602 // glutathione peroxidase activity // inferred from direct assay /// NM_053576 // GO:0004623 // phospholipase A2 activity // inferred from electronic annotation /// NM_053576 // GO:0004623 // phospholipase A2 activity // not recorded /// NM_053576 // GO:0016491 // oxidoreductase activity // inferred from el…	---						-1.50037		-1.50037		-2.40314	-1.80129			-1.53135		-1.91193			-1.72164	-1.81162
Psmd14	proteasome (prosome, macropain) 26S subunit, non-ATPase, 14 (Psmd14), mRNA.	2.88259	-1.9		2.88259			NM_001025689	---	---	NM_001025689 // Psmd14 // proteasome (prosome, macropain) 26S subunit, non-ATPase, 14 // 3q21 // 311078 /// ENSRNOT00000006605 // Psmd14 // proteasome (prosome, macropain) 26S subunit, non-ATPase, 14 // 3q21 // 311078 /// BC097427 // Psmd14 // proteasome (prosome, macropain) 26S subunit, non-ATPase, 14 // 3q21 // 311078	NM_001025689 // RefSeq // Rattus norvegicus proteasome (prosome, macropain) 26S subunit, non-ATPase, 14 (Psmd14), mRNA. // chr3 // 100 // 100 // 27 // 27 // 0 /// ENSRNOT00000006605 // ENSEMBL // RCG26455, isoform CRA_b gene:ENSRNOG00000004911 // chr3 // 100 // 100 // 27 // 27 // 0 /// BC097427 // GenBank // Rattus norvegicus proteasome (prosome, macropain) 26S subunit, non-ATPase, 14, mRNA (cDNA…	NM_001025689 // GO:0031145 // anaphase-promoting complex-dependent proteasomal ubiquitin-dependent protein catabolic process // not recorded /// NM_001025689 // GO:0051436 // negative regulation of ubiquitin-protein ligase activity involved in mitotic cell cycle // not recorded /// NM_001025689 // GO:0051437 // positive regulation of ubiquitin-protein ligase activity involved in mitotic cell cycl…	NM_001025689 // GO:0000502 // proteasome complex // inferred from electronic annotation /// ENSRNOT00000006605 // GO:0000502 // proteasome complex // inferred from electronic annotation /// BC097427 // GO:0000502 // proteasome complex // inferred from electronic annotation	NM_001025689 // GO:0005515 // protein binding // inferred from electronic annotation /// NM_001025689 // GO:0005515 // protein binding // not recorded /// NM_001025689 // GO:0061133 // endopeptidase activator activity // not recorded /// NM_001025689 // GO:0070628 // proteasome binding // inferred from electronic annotation /// NM_001025689 // GO:0070628 // proteasome binding // not recorded /// …	---										-2.1384					1.69283					-0.222785
Rnf7	ring finger protein 7 (Rnf7), mRNA.	3.49141	-1.9		3.49141			NM_001106848	---	---	NM_001106848 // Rnf7 // ring finger protein 7 // 8q31 // 300948 /// ENSRNOT00000015821 // Rnf7 // ring finger protein 7 // 8q31 // 300948	NM_001106848 // RefSeq // Rattus norvegicus ring finger protein 7 (Rnf7), mRNA. // chr8 // 100 // 100 // 19 // 19 // 0 /// ENSRNOT00000015821 // ENSEMBL // Uncharacterized protein gene:ENSRNOG00000011663 // chr8 // 100 // 100 // 19 // 19 // 0	NM_001106848 // GO:0006916 // anti-apoptosis // not recorded /// NM_001106848 // GO:0006919 // activation of caspase activity // not recorded /// NM_001106848 // GO:0008631 // induction of apoptosis by oxidative stress // not recorded /// NM_001106848 // GO:0008637 // apoptotic mitochondrial changes // not recorded /// NM_001106848 // GO:0045116 // protein neddylation // not recorded /// ENSRNOT0…	NM_001106848 // GO:0005634 // nucleus // not recorded /// NM_001106848 // GO:0005737 // cytoplasm // not recorded /// ENSRNOT00000015821 // GO:0005634 // nucleus // not recorded /// ENSRNOT00000015821 // GO:0005737 // cytoplasm // not recorded	NM_001106848 // GO:0005515 // protein binding // inferred from electronic annotation /// NM_001106848 // GO:0005515 // protein binding // not recorded /// NM_001106848 // GO:0008270 // zinc ion binding // inferred from electronic annotation /// NM_001106848 // GO:0019788 // NEDD8 ligase activity // not recorded /// NM_001106848 // GO:0046872 // metal ion binding // inferred from electronic annota…	---
Sdhd	succinate dehydrogenase complex, subunit D, integral membrane protein (Sdhd), nuclear gene encoding mitochondrial protein, mRNA.	3.73001	-1.9		3.73001			NM_198788	---	---	NM_198788 // Sdhd // succinate dehydrogenase complex, subunit D, integral membrane protein // 8q23 // 363061 /// ENSRNOT00000059169 // Sdhd // succinate dehydrogenase complex, subunit D, integral membrane protein // 8q23 // 363061 /// BC059160 // Sdhd // succinate dehydrogenase complex, subunit D, integral membrane protein // 8q23 // 363061 /// ENSRNOT00000036431 // Sdhd // succinate dehydrogenas…	NM_198788 // RefSeq // Rattus norvegicus succinate dehydrogenase complex, subunit D, integral membrane protein (Sdhd), nuclear gene encoding mitochondrial protein, mRNA. // chr8 // 100 // 100 // 16 // 16 // 0 /// ENSRNOT00000059169 // ENSEMBL // Succinate dehydrogenase [ubiquinone] cytochrome b small subunit, mitochondrial gene:ENSRNOG00000022980 // chr8 // 100 // 100 // 16 // 16 // 0 /// BC05916…	NM_198788 // GO:0006099 // tricarboxylic acid cycle // inferred from electronic annotation /// NM_198788 // GO:0006099 // tricarboxylic acid cycle // not recorded /// NM_198788 // GO:0006810 // transport // inferred from electronic annotation /// NM_198788 // GO:0022900 // electron transport chain // inferred from electronic annotation /// ENSRNOT00000059169 // GO:0006099 // tricarboxylic acid cy…	NM_198788 // GO:0005739 // mitochondrion // inferred from electronic annotation /// NM_198788 // GO:0005739 // mitochondrion // not recorded /// NM_198788 // GO:0005740 // mitochondrial envelope // inferred from electronic annotation /// NM_198788 // GO:0005743 // mitochondrial inner membrane // not recorded /// NM_198788 // GO:0005743 // mitochondrial inner membrane // inferred from sequence or …	NM_198788 // GO:0000104 // succinate dehydrogenase activity // not recorded /// NM_198788 // GO:0020037 // heme binding // inferred from electronic annotation /// NM_198788 // GO:0020037 // heme binding // inferred from sequence or structural similarity /// NM_198788 // GO:0046872 // metal ion binding // inferred from electronic annotation /// NM_198788 // GO:0048039 // ubiquinone binding // infe…	---	11.9656									-1.6815										5.14205
Taglin	transgelin (Tagln), mRNA.		-1.9	-2.37427			-2.37427													-1.56049				-1.56049		1.61278	0.026145	-1.6305				0.00280833			0.00280833	-0.52607
Tmem126b	transmembrane protein 126B (Tmem126b), mRNA.	3.87007	-1.9		3.87007			NM_001106280	---	---	NM_001106280 // Tmem126b // transmembrane protein 126B // 1q32 // 293114 /// ENSRNOT00000038279 // Tmem126b // transmembrane protein 126B // 1q32 // 293114 /// BC167111 // Tmem126b // transmembrane protein 126B // 1q32 // 293114	NM_001106280 // RefSeq // Rattus norvegicus transmembrane protein 126B (Tmem126b), mRNA. // chr1 // 96 // 100 // 25 // 26 // 0 /// ENSRNOT00000038279 // ENSEMBL // Transmembrane protein 126B gene:ENSRNOG00000022732 // chr1 // 100 // 100 // 26 // 26 // 0 /// BC167111 // GenBank // Rattus norvegicus transmembrane protein 126B, mRNA (cDNA clone MGC:189574 IMAGE:6921139), complete cds. // chr1 // 96 …	NM_001106280 // GO:0008150 // biological_process // no biological data available /// ENSRNOT00000038279 // GO:0008150 // biological_process // no biological data available /// BC167111 // GO:0008150 // biological_process // no biological data available	NM_001106280 // GO:0005575 // cellular_component // no biological data available /// NM_001106280 // GO:0016021 // integral to membrane // inferred from electronic annotation /// ENSRNOT00000038279 // GO:0005575 // cellular_component // no biological data available /// ENSRNOT00000038279 // GO:0016021 // integral to membrane // inferred from electronic annotation /// BC167111 // GO:0005575 // cel…	NM_001106280 // GO:0003674 // molecular_function // no biological data available /// ENSRNOT00000038279 // GO:0003674 // molecular_function // no biological data available /// BC167111 // GO:0003674 // molecular_function // no biological data available	---															1.67804					1.67804
Mrpl12	mitochondrial ribosomal protein L12 (Mrpl12), nuclear gene encoding mitochondrial protein, mRNA.	2.77615	-1.89745		2.77615	-1.89745		NM_001029900	---	---	NM_001029900 // Mrpl12 // mitochondrial ribosomal protein L12 // 10q32.3 // 303746 /// ENSRNOT00000054965 // Mrpl12 // mitochondrial ribosomal protein L12 // 10q32.3 // 303746	NM_001029900 // RefSeq // Rattus norvegicus mitochondrial ribosomal protein L12 (Mrpl12), nuclear gene encoding mitochondrial protein, mRNA. // chr10 // 100 // 100 // 25 // 25 // 0 /// ENSRNOT00000054965 // ENSEMBL // Uncharacterized protein gene:ENSRNOG00000036695 // chr10 // 100 // 100 // 25 // 25 // 0	NM_001029900 // GO:0006390 // transcription from mitochondrial promoter // not recorded /// NM_001029900 // GO:0006412 // translation // inferred from electronic annotation /// NM_001029900 // GO:0045893 // positive regulation of transcription, DNA-dependent // not recorded /// ENSRNOT00000054965 // GO:0006390 // transcription from mitochondrial promoter // not recorded /// ENSRNOT00000054965 // …	NM_001029900 // GO:0005622 // intracellular // inferred from electronic annotation /// NM_001029900 // GO:0005739 // mitochondrion // not recorded /// NM_001029900 // GO:0005762 // mitochondrial large ribosomal subunit // not recorded /// NM_001029900 // GO:0005840 // ribosome // inferred from electronic annotation /// ENSRNOT00000054965 // GO:0005622 // intracellular // inferred from electronic …	NM_001029900 // GO:0003735 // structural constituent of ribosome // inferred from electronic annotation /// NM_001029900 // GO:0005515 // protein binding // not recorded /// ENSRNOT00000054965 // GO:0003735 // structural constituent of ribosome // inferred from electronic annotation /// ENSRNOT00000054965 // GO:0005515 // protein binding // not recorded	---	1.81579																			1.81579
Blnk	B-cell linker (Blnk), mRNA.	1.5	-1.89463			-1.89463		NM_001025767	---	---	NM_001025767 // Blnk // B-cell linker // 1q54 // 499356 /// ENSRNOT00000019014 // Blnk // B-cell linker // 1q54 // 499356 /// BC098790 // Blnk // B-cell linker // 1q54 // 499356 /// ENSRNOT00000064992 // Blnk // B-cell linker // 1q54 // 499356	NM_001025767 // RefSeq // Rattus norvegicus B-cell linker (Blnk), mRNA. // chr1 // 100 // 100 // 32 // 32 // 0 /// ENSRNOT00000019014 // ENSEMBL // B-cell linker protein gene:ENSRNOG00000013967 // chr1 // 100 // 100 // 32 // 32 // 0 /// BC098790 // GenBank // Rattus norvegicus B-cell linker, mRNA (cDNA clone MGC:112831 IMAGE:7375523), complete cds. // chr1 // 100 // 100 // 32 // 32 // 0 /// ENSRN…	NM_001025767 // GO:0008150 // biological_process // no biological data available /// NM_001025767 // GO:0023034 // intracellular signaling pathway // not recorded /// NM_001025767 // GO:0042113 // B cell activation // inferred from electronic annotation /// ENSRNOT00000019014 // GO:0008150 // biological_process // no biological data available /// ENSRNOT00000019014 // GO:0023034 // intracellular …	NM_001025767 // GO:0005575 // cellular_component // no biological data available /// NM_001025767 // GO:0005737 // cytoplasm // inferred from electronic annotation /// NM_001025767 // GO:0005886 // plasma membrane // inferred from electronic annotation /// ENSRNOT00000019014 // GO:0005575 // cellular_component // no biological data available /// ENSRNOT00000019014 // GO:0005737 // cytoplasm // in…	NM_001025767 // GO:0003674 // molecular_function // no biological data available /// NM_001025767 // GO:0005070 // SH3/SH2 adaptor activity // not recorded /// NM_001025767 // GO:0005515 // protein binding // inferred from electronic annotation /// NM_001025767 // GO:0005515 // protein binding // not recorded /// ENSRNOT00000019014 // GO:0003674 // molecular_function // no biological data availab…	---
Psmc4	proteasome (prosome, macropain) 26S subunit, ATPase, 4 (Psmc4), mRNA.		-1.89444			-1.89444		NM_057122	---	---	NM_057122 // Psmc4 // proteasome (prosome, macropain) 26S subunit, ATPase, 4 // 1q21 // 117262 /// ENSRNOT00000025819 // Psmc4 // proteasome (prosome, macropain) 26S subunit, ATPase, 4 // 1q21 // 117262 /// D50695 // Psmc4 // proteasome (prosome, macropain) 26S subunit, ATPase, 4 // 1q21 // 117262	NM_057122 // RefSeq // Rattus norvegicus proteasome (prosome, macropain) 26S subunit, ATPase, 4 (Psmc4), mRNA. // chr7 // 68 // 100 // 17 // 25 // 0 /// ENSRNOT00000025819 // ENSEMBL // 26S protease regulatory subunit 6B gene:ENSRNOG00000018994 // chr7 // 68 // 100 // 17 // 25 // 0 /// D50695 // GenBank // Rattus norvegicus mRNA for proteasomal ATPase (Tat-binding protein7), complete cds. // chr7…	NM_057122 // GO:0001824 // blastocyst development // inferred from electronic annotation /// NM_057122 // GO:0001824 // blastocyst development // not recorded /// NM_057122 // GO:0030163 // protein catabolic process // inferred from electronic annotation /// NM_057122 // GO:0031145 // anaphase-promoting complex-dependent proteasomal ubiquitin-dependent protein catabolic process // not recorded //…	NM_057122 // GO:0000502 // proteasome complex // inferred from electronic annotation /// NM_057122 // GO:0005634 // nucleus // inferred from electronic annotation /// NM_057122 // GO:0005634 // nucleus // not recorded /// NM_057122 // GO:0005737 // cytoplasm // inferred from electronic annotation /// NM_057122 // GO:0005737 // cytoplasm // not recorded /// NM_057122 // GO:0005739 // mitochondrion…	NM_057122 // GO:0000166 // nucleotide binding // inferred from electronic annotation /// NM_057122 // GO:0005515 // protein binding // not recorded /// NM_057122 // GO:0005524 // ATP binding // inferred from electronic annotation /// NM_057122 // GO:0016787 // hydrolase activity // inferred from electronic annotation /// NM_057122 // GO:0016887 // ATPase activity // traceable author statement ///…	D50695 // GenMAPP // Proteasome_Degradation
Suclg1	succinate-CoA ligase, alpha subunit (Suclg1), mRNA.	3.45284	-1.8939	1.82314	3.45284	-1.8939	1.82314	NM_053752	---	---	NM_053752 // Suclg1 // succinate-CoA ligase, alpha subunit // 4q33 // 114597 /// ENSRNOT00000007624 // Suclg1 // succinate-CoA ligase, alpha subunit // 4q33 // 114597 /// BC061537 // Suclg1 // succinate-CoA ligase, alpha subunit // 4q33 // 114597	NM_053752 // RefSeq // Rattus norvegicus succinate-CoA ligase, alpha subunit (Suclg1), nuclear gene encoding mitochondrial protein, mRNA. // chr4 // 92 // 100 // 57 // 62 // 0 /// ENSRNOT00000007624 // ENSEMBL // Succinyl-CoA ligase [GDP-forming] subunit alpha, mitochondrial gene:ENSRNOG00000005587 // chr4 // 100 // 100 // 62 // 62 // 0 /// BC061537 // GenBank // Rattus norvegicus succinate-CoA l…	NM_053752 // GO:0006099 // tricarboxylic acid cycle // inferred from direct assay /// NM_053752 // GO:0006104 // succinyl-CoA metabolic process // inferred from direct assay /// NM_053752 // GO:0006105 // succinate metabolic process // inferred from direct assay /// ENSRNOT00000007624 // GO:0006099 // tricarboxylic acid cycle // inferred from direct assay /// ENSRNOT00000007624 // GO:0006104 // s…	NM_053752 // GO:0005739 // mitochondrion // inferred from direct assay /// NM_053752 // GO:0005739 // mitochondrion // not recorded /// NM_053752 // GO:0005743 // mitochondrial inner membrane // inferred from electronic annotation /// NM_053752 // GO:0005743 // mitochondrial inner membrane // not recorded /// NM_053752 // GO:0045244 // succinate-CoA ligase complex (GDP-forming) // inferred from d…	NM_053752 // GO:0000166 // nucleotide binding // inferred from electronic annotation /// NM_053752 // GO:0003878 // ATP citrate synthase activity // inferred from electronic annotation /// NM_053752 // GO:0004775 // succinate-CoA ligase (ADP-forming) activity // inferred from direct assay /// NM_053752 // GO:0004776 // succinate-CoA ligase (GDP-forming) activity // inferred from direct assay /// …	BC061537 // GenMAPP // Krebs-TCA_Cycle	3.01172																			3.01172
mrpl24	mitochondrial ribosomal protein L24 (mrpl24), nuclear gene encoding mitochondrial protein, mRNA.	2.90633	-1.89228	1.53589	2.90633	-1.89228		NM_001007637	---	---	NM_001007637 // mrpl24 // mitochondrial ribosomal protein L24 // 2q34 // 295224 /// ENSRNOT00000035271 // mrpl24 // mitochondrial ribosomal protein L24 // 2q34 // 295224 /// BC079059 // RGD1311265 // similar to CGI-41 protein // 2q34 // 361976 /// BC082018 // mrpl24 // mitochondrial ribosomal protein L24 // 2q34 // 295224 /// ENSRNOT00000015793 // RGD1311265 // similar to CGI-41 protein // 2q34 /…	NM_001007637 // RefSeq // Rattus norvegicus mitochondrial ribosomal protein L24 (mrpl24), nuclear gene encoding mitochondrial protein, mRNA. // chr2 // 100 // 11 // 3 // 3 // 0 /// ENSRNOT00000035271 // ENSEMBL // 39S ribosomal protein L24, mitochondrial gene:ENSRNOG00000022234 // chr2 // 100 // 11 // 3 // 3 // 0 /// BC079059 // GenBank // Rattus norvegicus similar to CGI-41 protein, mRNA (cDNA c…	NM_001007637 // GO:0006412 // translation // inferred from electronic annotation /// ENSRNOT00000035271 // GO:0006412 // translation // inferred from electronic annotation /// BC082018 // GO:0006412 // translation // inferred from electronic annotation	NM_001007637 // GO:0005622 // intracellular // inferred from electronic annotation /// NM_001007637 // GO:0005739 // mitochondrion // inferred from electronic annotation /// NM_001007637 // GO:0005739 // mitochondrion // not recorded /// NM_001007637 // GO:0005840 // ribosome // inferred from electronic annotation /// ENSRNOT00000035271 // GO:0005622 // intracellular // inferred from electronic a…	NM_001007637 // GO:0003735 // structural constituent of ribosome // inferred from electronic annotation /// ENSRNOT00000035271 // GO:0003735 // structural constituent of ribosome // inferred from electronic annotation /// BC082018 // GO:0003735 // structural constituent of ribosome // inferred from electronic annotation	---	2.00924																			2.00924
Atp5g1	ATP synthase, H+ transporting, mitochondrial F0 complex, subunit C1 (subunit 9) (Atp5g1), nuclear gene encoding mitochondrial protein, mRNA.	1.63807	-1.89224		1.63807	-1.89224		NM_017311	---	---	NM_017311 // Atp5g1 // ATP synthase, H+ transporting, mitochondrial F0 complex, subunit C1 (subunit 9) // 10q31 // 29754 /// ENSRNOT00000009815 // Atp5g1 // ATP synthase, H+ transporting, mitochondrial F0 complex, subunit C1 (subunit 9) // 10q31 // 29754 /// D13123 // Atp5g1 // ATP synthase, H+ transporting, mitochondrial F0 complex, subunit C1 (subunit 9) // 10q31 // 29754 /// ENSRNOT00000028681…	NM_017311 // RefSeq // Rattus norvegicus ATP synthase, H+ transporting, mitochondrial F0 complex, subunit C1 (subunit 9) (Atp5g1), nuclear gene encoding mitochondrial protein, mRNA. // chr10 // 89 // 100 // 24 // 27 // 0 /// ENSRNOT00000009815 // ENSEMBL // ATP synthase lipid-binding protein, mitochondrial gene:ENSRNOG00000007235 // chr10 // 100 // 100 // 27 // 27 // 0 /// D13123 // GenBank // Ra…	NM_017311 // GO:0006811 // ion transport // inferred from electronic annotation /// NM_017311 // GO:0015986 // ATP synthesis coupled proton transport // inferred from electronic annotation /// NM_017311 // GO:0045471 // response to ethanol // inferred from expression pattern /// NM_017311 // GO:0046034 // ATP metabolic process // inferred from direct assay /// ENSRNOT00000009815 // GO:0006811 // …	NM_017311 // GO:0000276 // mitochondrial proton-transporting ATP synthase complex, coupling factor F(o) // inferred from direct assay /// NM_017311 // GO:0005739 // mitochondrion // not recorded /// NM_017311 // GO:0005739 // mitochondrion // non-traceable author statement /// NM_017311 // GO:0005743 // mitochondrial inner membrane // not recorded /// NM_017311 // GO:0016020 // membrane // inferr…	NM_017311 // GO:0003674 // molecular_function // no biological data available /// NM_017311 // GO:0008289 // lipid binding // inferred from electronic annotation /// NM_017311 // GO:0015078 // hydrogen ion transmembrane transporter activity // inferred from electronic annotation /// ENSRNOT00000009815 // GO:0003674 // molecular_function // no biological data available /// ENSRNOT00000009815 // GO…	D13123 // GenMAPP // Electron_Transport_Chain
Ppa1	pyrophosphatase (inorganic) 1 (Ppa1), mRNA.	2.4196	-1.8877		2.4196	-1.8877		NM_001100834	---	---	NM_001100834 // Ppa1 // pyrophosphatase (inorganic) 1 // 20q11 // 294504 /// ENSRNOT00000000674 // Ppa1 // pyrophosphatase (inorganic) 1 // 20q11 // 294504	NM_001100834 // RefSeq // Rattus norvegicus pyrophosphatase (inorganic) 1 (Ppa1), mRNA. // chr20 // 100 // 100 // 33 // 33 // 0 /// ENSRNOT00000000674 // ENSEMBL // pyrophosphatase 1 gene:ENSRNOG00000000558 // chr20 // 100 // 100 // 33 // 33 // 0	NM_001100834 // GO:0006796 // phosphate metabolic process // inferred from electronic annotation /// NM_001100834 // GO:0008152 // metabolic process // not recorded /// NM_001100834 // GO:0071344 // diphosphate metabolic process // not recorded /// ENSRNOT00000000674 // GO:0006796 // phosphate metabolic process // inferred from electronic annotation /// ENSRNOT00000000674 // GO:0008152 // metabol…	NM_001100834 // GO:0005737 // cytoplasm // inferred from electronic annotation /// ENSRNOT00000000674 // GO:0005737 // cytoplasm // inferred from electronic annotation	NM_001100834 // GO:0000287 // magnesium ion binding // inferred from electronic annotation /// NM_001100834 // GO:0004427 // inorganic diphosphatase activity // inferred from electronic annotation /// NM_001100834 // GO:0016462 // pyrophosphatase activity // not recorded /// ENSRNOT00000000674 // GO:0000287 // magnesium ion binding // inferred from electronic annotation /// ENSRNOT00000000674 // …	---
Lynx1	Ly6/neurotoxin 1 (Lynx1), mRNA.	1.8631	-1.88719			-1.88719		NM_001130546	---	---	NM_001130546 // Lynx1 // Ly6/neurotoxin 1 // 7q34 // 300018 /// ENSRNOT00000007988 // Lynx1 // Ly6/neurotoxin 1 // 7q34 // 300018	NM_001130546 // RefSeq // Rattus norvegicus Ly6/neurotoxin 1 (Lynx1), mRNA. // chr7 // 100 // 100 // 26 // 26 // 0 /// ENSRNOT00000007988 // ENSEMBL // Uncharacterized protein gene:ENSRNOG00000006086 // chr7 // 100 // 96 // 25 // 25 // 0	NM_001130546 // GO:0009405 // pathogenesis // inferred from electronic annotation /// NM_001130546 // GO:0010469 // regulation of receptor activity // not recorded /// ENSRNOT00000007988 // GO:0009405 // pathogenesis // inferred from electronic annotation /// ENSRNOT00000007988 // GO:0010469 // regulation of receptor activity // not recorded	NM_001130546 // GO:0005624 // membrane fraction // not recorded /// NM_001130546 // GO:0005886 // plasma membrane // not recorded /// ENSRNOT00000007988 // GO:0005624 // membrane fraction // not recorded /// ENSRNOT00000007988 // GO:0005886 // plasma membrane // not recorded	NM_001130546 // GO:0005515 // protein binding // not recorded /// NM_001130546 // GO:0008200 // ion channel inhibitor activity // not recorded /// NM_001130546 // GO:0030550 // acetylcholine receptor inhibitor activity // not recorded /// ENSRNOT00000007988 // GO:0005515 // protein binding // not recorded /// ENSRNOT00000007988 // GO:0008200 // ion channel inhibitor activity // not recorded /// E…	---	1.97804																			1.97804
Mrpl19	mitochondrial ribosomal protein L19 (Mrpl19), nuclear gene encoding mitochondrial protein, mRNA.	2.29234	-1.88661		2.29234	-1.88661		NM_001029898	---	---	NM_001029898 // Mrpl19 // mitochondrial ribosomal protein L19 // 4q34 // 297372 /// ENSRNOT00000009308 // Mrpl19 // mitochondrial ribosomal protein L19 // 4q34 // 297372	NM_001029898 // RefSeq // Rattus norvegicus mitochondrial ribosomal protein L19 (Mrpl19), nuclear gene encoding mitochondrial protein, mRNA. // chr4 // 100 // 100 // 26 // 26 // 0 /// ENSRNOT00000009308 // ENSEMBL // Uncharacterized protein gene:ENSRNOG00000006968 // chr4 // 100 // 100 // 26 // 26 // 0	NM_001029898 // GO:0006412 // translation // inferred from electronic annotation /// ENSRNOT00000009308 // GO:0006412 // translation // inferred from electronic annotation	NM_001029898 // GO:0005622 // intracellular // inferred from electronic annotation /// NM_001029898 // GO:0005634 // nucleus // not recorded /// NM_001029898 // GO:0005739 // mitochondrion // not recorded /// NM_001029898 // GO:0005840 // ribosome // inferred from electronic annotation /// NM_001029898 // GO:0031965 // nuclear membrane // not recorded /// ENSRNOT00000009308 // GO:0005622 // intra…	NM_001029898 // GO:0003735 // structural constituent of ribosome // inferred from electronic annotation /// ENSRNOT00000009308 // GO:0003735 // structural constituent of ribosome // inferred from electronic annotation	---													1.70481		1.53729					1.62105
Usp18	ubiquitin specific peptidase 18 (Usp18), mRNA.	2.60443	-1.88485		2.60443			NM_001014058	---	---	NM_001014058 // Usp18 // ubiquitin specific peptidase 18 // 4q42 // 312688 /// ENSRNOT00000056174 // Usp18 // ubiquitin specific peptidase 18 // 4q42 // 312688 /// BC079101 // Usp18 // ubiquitin specific peptidase 18 // 4q42 // 312688	NM_001014058 // RefSeq // Rattus norvegicus ubiquitin specific peptidase 18 (Usp18), mRNA. // chr4 // 100 // 100 // 28 // 28 // 0 /// ENSRNOT00000056174 // ENSEMBL // Ubiquitin carboxyl-terminal hydrolase gene:ENSRNOG00000037198 // chr4 // 100 // 100 // 28 // 28 // 0 /// BC079101 // GenBank // Rattus norvegicus ubiquitin specific peptidase 18, mRNA (cDNA clone MGC:94088 IMAGE:7124857), complete c…	NM_001014058 // GO:0006511 // ubiquitin-dependent protein catabolic process // inferred from electronic annotation /// NM_001014058 // GO:0032020 // ISG15-protein conjugation // inferred from electronic annotation /// NM_001014058 // GO:0032020 // ISG15-protein conjugation // not recorded /// ENSRNOT00000056174 // GO:0006511 // ubiquitin-dependent protein catabolic process // inferred from electr…	NM_001014058 // GO:0005634 // nucleus // not recorded /// ENSRNOT00000056174 // GO:0005634 // nucleus // not recorded /// BC079101 // GO:0005634 // nucleus // not recorded	NM_001014058 // GO:0004221 // ubiquitin thiolesterase activity // inferred from electronic annotation /// NM_001014058 // GO:0008233 // peptidase activity // inferred from electronic annotation /// NM_001014058 // GO:0008234 // cysteine-type peptidase activity // inferred from electronic annotation /// NM_001014058 // GO:0019785 // ISG15-specific protease activity // inferred from electronic anno…	---
Acy1	aminoacylase 1 (Acy1), mRNA.	1.74565	-1.88103		1.74565	-1.88103		NM_001005383	---	---	NM_001005383 // Acy1 // aminoacylase 1 // 8q32 // 300981 /// ENSRNOT00000015851 // Acy1 // aminoacylase 1 // 8q32 // 300981 /// AY580164 // Acy1 // aminoacylase 1 // 8q32 // 300981	NM_001005383 // RefSeq // Rattus norvegicus aminoacylase 1 (Acy1), mRNA. // chr8 // 96 // 100 // 25 // 26 // 0 /// ENSRNOT00000015851 // ENSEMBL // Aminoacylase-1A gene:ENSRNOG00000011189 // chr8 // 100 // 100 // 26 // 26 // 0 /// AY580164 // GenBank // Rattus norvegicus kidney aminoacylase 1 mRNA, complete cds. // chr8 // 96 // 100 // 25 // 26 // 0	NM_001005383 // GO:0006508 // proteolysis // inferred from electronic annotation /// NM_001005383 // GO:0006520 // cellular amino acid metabolic process // inferred from electronic annotation /// NM_001005383 // GO:0008152 // metabolic process // inferred from electronic annotation /// NM_001005383 // GO:0030163 // protein catabolic process // traceable author statement /// ENSRNOT00000015851 // …	NM_001005383 // GO:0005625 // soluble fraction // inferred from direct assay /// NM_001005383 // GO:0005737 // cytoplasm // inferred from electronic annotation /// ENSRNOT00000015851 // GO:0005625 // soluble fraction // inferred from direct assay /// ENSRNOT00000015851 // GO:0005737 // cytoplasm // inferred from electronic annotation /// AY580164 // GO:0005625 // soluble fraction // inferred from…	NM_001005383 // GO:0004046 // aminoacylase activity // inferred from direct assay /// NM_001005383 // GO:0005515 // protein binding // inferred from electronic annotation /// NM_001005383 // GO:0008237 // metallopeptidase activity // inferred from electronic annotation /// NM_001005383 // GO:0016787 // hydrolase activity // inferred from electronic annotation /// NM_001005383 // GO:0046872 // met…	---
Mllt11	myeloid/lymphoid or mixed-lineage leukemia (trithorax homolog, Drosophila); translocated to, 11 (Mllt11), mRNA.	2.18649	-1.88075		2.18649	-1.88075		NM_001013912	---	---	NM_001013912 // Mllt11 // myeloid/lymphoid or mixed-lineage leukemia (trithorax homolog, Drosophila); translocated to, 11 // 2q34 // 295264 /// ENSRNOT00000028664 // Mllt11 // myeloid/lymphoid or mixed-lineage leukemia (trithorax homolog, Drosophila); translocated to, 11 // 2q34 // 295264 /// BC087583 // Mllt11 // myeloid/lymphoid or mixed-lineage leukemia (trithorax homolog, Drosophila); translo…	NM_001013912 // RefSeq // Rattus norvegicus myeloid/lymphoid or mixed-lineage leukemia (trithorax homolog, Drosophila); translocated to, 11 (Mllt11), mRNA. // chr2 // 100 // 100 // 25 // 25 // 0 /// ENSRNOT00000028664 // ENSEMBL // Protein AF1q gene:ENSRNOG00000021110 // chr2 // 100 // 100 // 25 // 25 // 0 /// BC087583 // GenBank // Rattus norvegicus myeloid/lymphoid or mixed-lineage leukemia (tr…	NM_001013912 // GO:0008150 // biological_process // no biological data available /// ENSRNOT00000028664 // GO:0008150 // biological_process // no biological data available /// BC087583 // GO:0008150 // biological_process // no biological data available	NM_001013912 // GO:0005575 // cellular_component // no biological data available /// ENSRNOT00000028664 // GO:0005575 // cellular_component // no biological data available /// BC087583 // GO:0005575 // cellular_component // no biological data available	NM_001013912 // GO:0003674 // molecular_function // no biological data available /// ENSRNOT00000028664 // GO:0003674 // molecular_function // no biological data available /// BC087583 // GO:0003674 // molecular_function // no biological data available	---
Ccdc53	coiled-coil domain containing 53 (Ccdc53), mRNA.	2.74619	-1.88065		2.74619	-1.88065		NM_001106776	---	---	NM_001106776 // Ccdc53 // coiled-coil domain containing 53 // 7q13 // 299707 /// ENSRNOT00000006903 // Ccdc53 // coiled-coil domain containing 53 // 7q13 // 299707 /// ENSRNOT00000065681 // Ccdc53 // coiled-coil domain containing 53 // 7q13 // 299707 /// ENSRNOT00000064346 // Ccdc53 // coiled-coil domain containing 53 // 7q13 // 299707	NM_001106776 // RefSeq // Rattus norvegicus coiled-coil domain containing 53 (Ccdc53), mRNA. // chr7 // 100 // 100 // 28 // 28 // 0 /// ENSRNOT00000006903 // ENSEMBL // Uncharacterized protein gene:ENSRNOG00000005102 // chr7 // 100 // 100 // 28 // 28 // 0 /// ENSRNOT00000065681 // ENSEMBL // Uncharacterized protein gene:ENSRNOG00000005102 // chr7 // 100 // 71 // 20 // 20 // 0 /// ENSRNOT000000643…	---	NM_001106776 // GO:0071203 // WASH complex // not recorded /// ENSRNOT00000006903 // GO:0071203 // WASH complex // not recorded /// ENSRNOT00000065681 // GO:0071203 // WASH complex // not recorded /// ENSRNOT00000064346 // GO:0071203 // WASH complex // not recorded	NM_001106776 // GO:0005515 // protein binding // not recorded /// ENSRNOT00000006903 // GO:0005515 // protein binding // not recorded /// ENSRNOT00000065681 // GO:0005515 // protein binding // not recorded /// ENSRNOT00000064346 // GO:0005515 // protein binding // not recorded	---															1.62276					1.62276
Echs1	enoyl Coenzyme A hydratase, short chain, 1, mitochondrial (Echs1), nuclear gene encoding mitochondrial protein, mRNA.	2.82712	-1.87978	1.50396	2.82712	-1.87978	1.50396	NM_078623	GenMAPP // GenMAPP	Fatty_Acid_Synthesis // Mitochondrial_fatty_acid_betaoxidation	NM_078623 // Echs1 // enoyl Coenzyme A hydratase, short chain, 1, mitochondrial // 1q41 // 140547 /// ENSRNOT00000025446 // Echs1 // enoyl Coenzyme A hydratase, short chain, 1, mitochondrial // 1q41 // 140547 /// BC064655 // Echs1 // enoyl Coenzyme A hydratase, short chain, 1, mitochondrial // 1q41 // 140547	NM_078623 // RefSeq // Rattus norvegicus enoyl Coenzyme A hydratase, short chain, 1, mitochondrial (Echs1), nuclear gene encoding mitochondrial protein, mRNA. // chr1 // 100 // 100 // 30 // 30 // 0 /// ENSRNOT00000025446 // ENSEMBL // Enoyl-CoA hydratase, mitochondrial gene:ENSRNOG00000018522 // chr1 // 100 // 100 // 30 // 30 // 0 /// BC064655 // GenBank // Rattus norvegicus enoyl Coenzyme A hydr…	NM_078623 // GO:0006629 // lipid metabolic process // inferred from electronic annotation /// NM_078623 // GO:0006631 // fatty acid metabolic process // inferred from electronic annotation /// NM_078623 // GO:0006635 // fatty acid beta-oxidation // inferred from mutant phenotype /// NM_078623 // GO:0006635 // fatty acid beta-oxidation // traceable author statement /// ENSRNOT00000025446 // GO:000…	NM_078623 // GO:0005625 // soluble fraction // inferred from direct assay /// NM_078623 // GO:0005739 // mitochondrion // inferred from direct assay /// NM_078623 // GO:0005739 // mitochondrion // not recorded /// NM_078623 // GO:0005739 // mitochondrion // traceable author statement /// NM_078623 // GO:0005759 // mitochondrial matrix // inferred from electronic annotation /// NM_078623 // GO:000…	NM_078623 // GO:0004300 // enoyl-CoA hydratase activity // inferred from direct assay /// NM_078623 // GO:0004300 // enoyl-CoA hydratase activity // inferred from mutant phenotype /// NM_078623 // GO:0004300 // enoyl-CoA hydratase activity // not recorded /// NM_078623 // GO:0005515 // protein binding // inferred from electronic annotation /// NM_078623 // GO:0005515 // protein binding // not rec…	NM_078623 // GenMAPP // Fatty_Acid_Synthesis /// NM_078623 // GenMAPP // Mitochondrial_fatty_acid_betaoxidation /// BC064655 // GenMAPP // Fatty_Acid_Synthesis /// BC064655 // GenMAPP // Mitochondrial_fatty_acid_betaoxidation	4.04881																			4.04881
Wee1	wee 1 homolog (S. pombe) (Wee1), mRNA.	2.06639	-1.87971		2.06639	-1.87971		NM_001012742	---	---	NM_001012742 // Wee1 // wee 1 homolog (S. pombe) // 1q33 // 308937 /// ENSRNOT00000013362 // Wee1 // wee 1 homolog (S. pombe) // 1q33 // 308937 /// BC090346 // Wee1 // wee 1 homolog (S. pombe) // 1q33 // 308937	NM_001012742 // RefSeq // Rattus norvegicus wee 1 homolog (S. pombe) (Wee1), mRNA. // chr1 // 100 // 91 // 32 // 32 // 0 /// ENSRNOT00000013362 // ENSEMBL // Wee1-like protein kinase gene:ENSRNOG00000010017 // chr1 // 100 // 91 // 32 // 32 // 0 /// BC090346 // GenBank // Rattus norvegicus wee 1 homolog (S. pombe), mRNA (cDNA clone MGC:105683 IMAGE:7306767), complete cds. // chr1 // 100 // 91 // 3…	NM_001012742 // GO:0006468 // protein phosphorylation // inferred from electronic annotation /// NM_001012742 // GO:0007049 // cell cycle // inferred from electronic annotation /// NM_001012742 // GO:0007067 // mitosis // inferred from electronic annotation /// NM_001012742 // GO:0051301 // cell division // inferred from electronic annotation /// ENSRNOT00000013362 // GO:0006468 // protein phosph…	NM_001012742 // GO:0005634 // nucleus // inferred from electronic annotation /// NM_001012742 // GO:0005654 // nucleoplasm // not recorded /// ENSRNOT00000013362 // GO:0005634 // nucleus // inferred from electronic annotation /// ENSRNOT00000013362 // GO:0005654 // nucleoplasm // not recorded /// BC090346 // GO:0005634 // nucleus // inferred from electronic annotation /// BC090346 // GO:0005654 /…	NM_001012742 // GO:0000166 // nucleotide binding // inferred from electronic annotation /// NM_001012742 // GO:0000287 // magnesium ion binding // inferred from electronic annotation /// NM_001012742 // GO:0004674 // protein serine/threonine kinase activity // inferred from electronic annotation /// NM_001012742 // GO:0004715 // non-membrane spanning protein tyrosine kinase activity // inferred f…	BC090346 // GenMAPP // Cell_cycle_KEGG	5.18271				1.6135			1.6135		-1.55311	0.557963					-0.497573			-0.497573	1.7477
Cmbl	carboxymethylenebutenolidase homolog (Pseudomonas) (Cmbl), mRNA.	4.25884	-1.87965	2.26577	4.25884	-1.87965	2.26577	NM_001008770	---	---	NM_001008770 // Cmbl // carboxymethylenebutenolidase homolog (Pseudomonas) // 2q22 // 310201 /// ENSRNOT00000015448 // Cmbl // carboxymethylenebutenolidase homolog (Pseudomonas) // 2q22 // 310201 /// BC088459 // Cmbl // carboxymethylenebutenolidase homolog (Pseudomonas) // 2q22 // 310201	NM_001008770 // RefSeq // Rattus norvegicus carboxymethylenebutenolidase homolog (Pseudomonas) (Cmbl), mRNA. // chr2 // 100 // 100 // 25 // 25 // 0 /// ENSRNOT00000015448 // ENSEMBL // Carboxymethylenebutenolidase homolog gene:ENSRNOG00000011260 // chr2 // 100 // 100 // 25 // 25 // 0 /// BC088459 // GenBank // Rattus norvegicus carboxymethylenebutenolidase homolog (Pseudomonas), mRNA (cDNA clone …	---	NM_001008770 // GO:0005737 // cytoplasm // inferred from electronic annotation /// NM_001008770 // GO:0005829 // cytosol // inferred from electronic annotation /// ENSRNOT00000015448 // GO:0005737 // cytoplasm // inferred from electronic annotation /// ENSRNOT00000015448 // GO:0005829 // cytosol // inferred from electronic annotation /// BC088459 // GO:0005737 // cytoplasm // inferred from electr…	NM_001008770 // GO:0005515 // protein binding // inferred from electronic annotation /// NM_001008770 // GO:0005515 // protein binding // not recorded /// NM_001008770 // GO:0016787 // hydrolase activity // inferred from electronic annotation /// ENSRNOT00000015448 // GO:0005515 // protein binding // inferred from electronic annotation /// ENSRNOT00000015448 // GO:0005515 // protein binding // no…	---		1.63264		1.61554	1.5885		1.5759	1.60315			1.58918					1.58918			1.58918	1.60315
Sord	sorbitol dehydrogenase (Sord), mRNA.	1.6	-1.87963			-1.87963		NM_017052	---	---	NM_017052 // Sord // sorbitol dehydrogenase // 3q35 // 24788 /// ENSRNOT00000023350 // Sord // sorbitol dehydrogenase // 3q35 // 24788 /// BC088398 // Sord // sorbitol dehydrogenase // 3q35 // 24788	NM_017052 // RefSeq // Rattus norvegicus sorbitol dehydrogenase (Sord), mRNA. // chr3 // 100 // 100 // 17 // 17 // 0 /// ENSRNOT00000023350 // ENSEMBL // Sorbitol dehydrogenase gene:ENSRNOG00000017291 // chr3 // 100 // 100 // 17 // 17 // 0 /// BC088398 // GenBank // Rattus norvegicus sorbitol dehydrogenase, mRNA (cDNA clone MGC:93504 IMAGE:7112546), complete cds. // chr3 // 100 // 100 // 17 // 17…	NM_017052 // GO:0006060 // sorbitol metabolic process // not recorded /// NM_017052 // GO:0006062 // sorbitol catabolic process // not recorded /// NM_017052 // GO:0006970 // response to osmotic stress // inferred from expression pattern /// NM_017052 // GO:0009725 // response to hormone stimulus // inferred from direct assay /// NM_017052 // GO:0031667 // response to nutrient levels // inferred …	NM_017052 // GO:0005575 // cellular_component // no biological data available /// NM_017052 // GO:0005624 // membrane fraction // not recorded /// NM_017052 // GO:0005625 // soluble fraction // not recorded /// ENSRNOT00000023350 // GO:0005575 // cellular_component // no biological data available /// ENSRNOT00000023350 // GO:0005624 // membrane fraction // not recorded /// ENSRNOT00000023350 // G…	NM_017052 // GO:0003939 // L-iditol 2-dehydrogenase activity // inferred from electronic annotation /// NM_017052 // GO:0003939 // L-iditol 2-dehydrogenase activity // not recorded /// NM_017052 // GO:0005488 // binding // inferred from electronic annotation /// NM_017052 // GO:0008270 // zinc ion binding // inferred from direct assay /// NM_017052 // GO:0008270 // zinc ion binding // not recorde…	---										-1.7726										-1.7726
Klhdc1	kelch domain containing 1 (Klhdc1), mRNA.	2.2868	-1.87824		2.2868			NM_001108027	---	---	NM_001108027 // Klhdc1 // kelch domain containing 1 // 6q24 // 314190 /// ENSRNOT00000064668 // Klhdc1 // kelch domain containing 1 // 6q24 // 314190 /// BC159403 // Klhdc1 // kelch domain containing 1 // 6q24 // 314190 /// ENSRNOT00000005895 // Klhdc1 // kelch domain containing 1 // 6q24 // 314190	NM_001108027 // RefSeq // Rattus norvegicus kelch domain containing 1 (Klhdc1), mRNA. // chr6 // 100 // 77 // 20 // 20 // 0 /// ENSRNOT00000064668 // ENSEMBL // Klhdc1 protein gene:ENSRNOG00000004425 // chr6 // 100 // 92 // 24 // 24 // 0 /// BC159403 // GenBank // Rattus norvegicus kelch domain containing 1, mRNA (cDNA clone MGC:188657 IMAGE:7457550), complete cds. // chr6 // 100 // 92 // 24 // 2…	---	NM_001108027 // GO:0005737 // cytoplasm // not recorded /// ENSRNOT00000064668 // GO:0005737 // cytoplasm // not recorded /// BC159403 // GO:0005737 // cytoplasm // not recorded /// ENSRNOT00000005895 // GO:0005737 // cytoplasm // not recorded	NM_001108027 // GO:0005515 // protein binding // inferred from electronic annotation /// ENSRNOT00000064668 // GO:0005515 // protein binding // inferred from electronic annotation /// BC159403 // GO:0005515 // protein binding // inferred from electronic annotation /// ENSRNOT00000005895 // GO:0005515 // protein binding // inferred from electronic annotation	---
Aldh6a1	aldehyde dehydrogenase 6 family, member A1 (Aldh6a1), nuclear gene encoding mitochondrial protein, mRNA.	3.07388	-1.87024	1.64357	3.07388	-1.87024	1.64357	NM_031057	---	---	NM_031057 // Aldh6a1 // aldehyde dehydrogenase 6 family, member A1 // 6q31 // 81708 /// ENSRNOT00000015545 // Aldh6a1 // aldehyde dehydrogenase 6 family, member A1 // 6q31 // 81708 /// ENSRNOT00000015156 // RGD1560978 // similar to hypothetical protein // 6q31 // 500693	NM_031057 // RefSeq // Rattus norvegicus aldehyde dehydrogenase 6 family, member A1 (Aldh6a1), nuclear gene encoding mitochondrial protein, mRNA. // chr6 // 100 // 100 // 35 // 35 // 0 /// ENSRNOT00000015545 // ENSEMBL // Methylmalonate-semialdehyde dehydrogenase [acylating], mitochondrial gene:ENSRNOG00000011419 // chr6 // 100 // 100 // 35 // 35 // 0 /// ENSRNOT00000015156 // ENSEMBL // Uncharac…	NM_031057 // GO:0006210 // thymine catabolic process // inferred from direct assay /// NM_031057 // GO:0006573 // valine metabolic process // inferred from direct assay /// NM_031057 // GO:0006574 // valine catabolic process // inferred from direct assay /// NM_031057 // GO:0019484 // beta-alanine catabolic process // inferred from direct assay /// NM_031057 // GO:0019859 // thymine metabolic pro…	NM_031057 // GO:0005575 // cellular_component // no biological data available /// NM_031057 // GO:0005739 // mitochondrion // inferred from electronic annotation /// NM_031057 // GO:0005739 // mitochondrion // not recorded /// ENSRNOT00000015545 // GO:0005575 // cellular_component // no biological data available /// ENSRNOT00000015545 // GO:0005739 // mitochondrion // inferred from electronic ann…	NM_031057 // GO:0000062 // acyl-CoA binding // inferred from sequence or structural similarity /// NM_031057 // GO:0004491 // methylmalonate-semialdehyde dehydrogenase (acylating) activity // inferred from direct assay /// NM_031057 // GO:0004491 // methylmalonate-semialdehyde dehydrogenase (acylating) activity // non-traceable author statement /// NM_031057 // GO:0016491 // oxidoreductase activi…	---	2.75958	1.51647						1.51647		-2.41728	-0.450405		1.70265			-0.388345			0.657153	0.890355
Mrpl20	mitochondrial ribosomal protein L20 (Mrpl20), nuclear gene encoding mitochondrial protein, mRNA.	1.96518	-1.86811		1.96518	-1.86811		NM_001109428	---	---	NM_001109428 // Mrpl20 // mitochondrial ribosomal protein L20 // 5q36 // 680747 /// ENSRNOT00000025213 // Mrpl20 // mitochondrial ribosomal protein L20 // 5q36 // 680747 /// BC166541 // Mrpl20 // mitochondrial ribosomal protein L20 // 5q36 // 680747 /// NM_001109427 // LOC680734 // similar to Ankyrin-2 (Brain ankyrin) (Ankyrin B) (Ankyrin, nonerythroid) // 5q36 // 680734 /// ENSRNOT00000068770 //…	NM_001109428 // RefSeq // Rattus norvegicus mitochondrial ribosomal protein L20 (Mrpl20), nuclear gene encoding mitochondrial protein, mRNA. // chr5 // 100 // 72 // 18 // 18 // 0 /// ENSRNOT00000025213 // ENSEMBL // RCG30918, isoform CRA_a gene:ENSRNOG00000018647 // chr5 // 100 // 72 // 18 // 18 // 0 /// BC166541 // GenBank // Rattus norvegicus mitochondrial ribosomal protein L20, mRNA (cDNA clon…	NM_001109428 // GO:0006412 // translation // inferred from electronic annotation /// NM_001109428 // GO:0006412 // translation // not recorded /// ENSRNOT00000025213 // GO:0006412 // translation // inferred from electronic annotation /// ENSRNOT00000025213 // GO:0006412 // translation // not recorded /// BC166541 // GO:0006412 // translation // inferred from electronic annotation /// BC166541 // …	NM_001109428 // GO:0005622 // intracellular // inferred from electronic annotation /// NM_001109428 // GO:0005739 // mitochondrion // inferred from electronic annotation /// NM_001109428 // GO:0005739 // mitochondrion // not recorded /// NM_001109428 // GO:0005762 // mitochondrial large ribosomal subunit // inferred from electronic annotation /// NM_001109428 // GO:0005762 // mitochondrial large …	NM_001109428 // GO:0003735 // structural constituent of ribosome // inferred from electronic annotation /// NM_001109428 // GO:0003735 // structural constituent of ribosome // not recorded /// NM_001109428 // GO:0019843 // rRNA binding // inferred from electronic annotation /// ENSRNOT00000025213 // GO:0003735 // structural constituent of ribosome // inferred from electronic annotation /// ENSRNO…	---	2.67872														1.51524					2.09698
Phb2	prohibitin 2 (Phb2), mRNA.	2.41215	-1.86803		2.41215	-1.86803		NM_001013035	---	---	NM_001013035 // Phb2 // prohibitin 2 // 4q42 // 114766 /// ENSRNOT00000017472 // Phb2 // prohibitin 2 // 4q42 // 114766 /// BC083705 // Phb2 // prohibitin 2 // 4q42 // 114766 /// ENSRNOT00000056040 // Phb2 // prohibitin 2 // 4q42 // 114766	NM_001013035 // RefSeq // Rattus norvegicus prohibitin 2 (Phb2), mRNA. // chr4 // 100 // 100 // 24 // 24 // 0 /// ENSRNOT00000017472 // ENSEMBL // Prohibitin-2 gene:ENSRNOG00000012999 // chr4 // 100 // 96 // 23 // 23 // 0 /// BC083705 // GenBank // Rattus norvegicus prohibitin 2, mRNA (cDNA clone MGC:94585 IMAGE:7190294), complete cds. // chr4 // 100 // 100 // 24 // 24 // 0 /// ENSRNOT00000056040…	NM_001013035 // GO:0016481 // negative regulation of transcription // not recorded /// NM_001013035 // GO:0033147 // negative regulation of estrogen receptor signaling pathway // inferred from electronic annotation /// NM_001013035 // GO:0033147 // negative regulation of estrogen receptor signaling pathway // not recorded /// NM_001013035 // GO:0033600 // negative regulation of mammary gland epit…	NM_001013035 // GO:0005634 // nucleus // not recorded /// NM_001013035 // GO:0005634 // nucleus // inferred from sequence or structural similarity /// NM_001013035 // GO:0005737 // cytoplasm // inferred from electronic annotation /// NM_001013035 // GO:0005739 // mitochondrion // inferred from electronic annotation /// NM_001013035 // GO:0005739 // mitochondrion // not recorded /// NM_001013035 /…	NM_001013035 // GO:0004872 // receptor activity // inferred from electronic annotation /// NM_001013035 // GO:0005515 // protein binding // inferred from electronic annotation /// NM_001013035 // GO:0005515 // protein binding // not recorded /// NM_001013035 // GO:0016566 // specific transcriptional repressor activity // not recorded /// NM_001013035 // GO:0016566 // specific transcriptional repr…	---
Ptgr1	prostaglandin reductase 1 (Ptgr1), mRNA.	2.37578	-1.86085		2.37578	-1.86085		NM_138863	---	---	NM_138863 // Ptgr1 // prostaglandin reductase 1 // 5q24 // 192227 /// ENSRNOT00000020335 // Ptgr1 // prostaglandin reductase 1 // 5q24 // 192227 /// BC089775 // Ptgr1 // prostaglandin reductase 1 // 5q24 // 192227	NM_138863 // RefSeq // Rattus norvegicus prostaglandin reductase 1 (Ptgr1), mRNA. // chr5 // 100 // 100 // 30 // 30 // 0 /// ENSRNOT00000020335 // ENSEMBL // Prostaglandin reductase 1 gene:ENSRNOG00000015072 // chr5 // 100 // 100 // 30 // 30 // 0 /// BC089775 // GenBank // Rattus norvegicus prostaglandin reductase 1, mRNA (cDNA clone MGC:108590 IMAGE:7307365), complete cds. // chr5 // 100 // 100 …	NM_138863 // GO:0009636 // response to toxin // inferred from expression pattern /// NM_138863 // GO:0055114 // oxidation reduction // inferred from electronic annotation /// ENSRNOT00000020335 // GO:0009636 // response to toxin // inferred from expression pattern /// ENSRNOT00000020335 // GO:0055114 // oxidation reduction // inferred from electronic annotation /// BC089775 // GO:0009636 // respo…	NM_138863 // GO:0005737 // cytoplasm // inferred from electronic annotation /// ENSRNOT00000020335 // GO:0005737 // cytoplasm // inferred from electronic annotation /// BC089775 // GO:0005737 // cytoplasm // inferred from electronic annotation	NM_138863 // GO:0005488 // binding // inferred from electronic annotation /// NM_138863 // GO:0008270 // zinc ion binding // inferred from electronic annotation /// NM_138863 // GO:0016491 // oxidoreductase activity // inferred from electronic annotation /// NM_138863 // GO:0032440 // 2-alkenal reductase activity // inferred from electronic annotation /// NM_138863 // GO:0047522 // 15-oxoprostagl…	---
Timm9	Mitochondrial import inner membrane translocase subunit Tim9 gene:ENSRNOG00000008222	2.03796	-1.85933		2.03796	-1.85933		ENSRNOT00000010871	---	---	ENSRNOT00000010871 // Timm9 // translocase of inner mitochondrial membrane 9 homolog (yeast) // 6q24 // 171139	ENSRNOT00000010871 // ENSEMBL // Mitochondrial import inner membrane translocase subunit Tim9 gene:ENSRNOG00000008222 // chr6 // 100 // 100 // 26 // 26 // 0 /// FQ228524 // GenBank // Rattus norvegicus TL0ADA7YF05 mRNA sequence. // chr6 // 100 // 100 // 26 // 26 // 0	ENSRNOT00000010871 // GO:0015031 // protein transport // inferred from electronic annotation /// ENSRNOT00000010871 // GO:0045039 // protein import into mitochondrial inner membrane // inferred from electronic annotation /// ENSRNOT00000010871 // GO:0055085 // transmembrane transport // inferred from electronic annotation	ENSRNOT00000010871 // GO:0005739 // mitochondrion // inferred from electronic annotation /// ENSRNOT00000010871 // GO:0005739 // mitochondrion // not recorded /// ENSRNOT00000010871 // GO:0005743 // mitochondrial inner membrane // inferred from electronic annotation /// ENSRNOT00000010871 // GO:0016020 // membrane // inferred from electronic annotation /// ENSRNOT00000010871 // GO:0042719 // mito…	ENSRNOT00000010871 // GO:0005515 // protein binding // inferred from electronic annotation /// ENSRNOT00000010871 // GO:0005515 // protein binding // not recorded /// ENSRNOT00000010871 // GO:0046872 // metal ion binding // inferred from electronic annotation	---
Pigw	phosphatidylinositol glycan anchor biosynthesis, class W (Pigw), mRNA.	1.95332	-1.85932		1.95332	-1.85932		NM_194461	---	---	NM_194461 // Pigw // phosphatidylinositol glycan anchor biosynthesis, class W // 10q26 // 378774 /// ENSRNOT00000029769 // Pigw // phosphatidylinositol glycan anchor biosynthesis, class W // 10q26 // 378774	NM_194461 // RefSeq // Rattus norvegicus phosphatidylinositol glycan anchor biosynthesis, class W (Pigw), mRNA. // chr10 // 100 // 100 // 25 // 25 // 0 /// ENSRNOT00000029769 // ENSEMBL // Phosphatidylinositol-glycan biosynthesis class W protein gene:ENSRNOG00000027857 // chr10 // 100 // 100 // 25 // 25 // 0	NM_194461 // GO:0006506 // GPI anchor biosynthetic process // inferred from electronic annotation /// NM_194461 // GO:0016254 // preassembly of GPI anchor in ER membrane // not recorded /// ENSRNOT00000029769 // GO:0006506 // GPI anchor biosynthetic process // inferred from electronic annotation /// ENSRNOT00000029769 // GO:0016254 // preassembly of GPI anchor in ER membrane // not recorded	NM_194461 // GO:0005783 // endoplasmic reticulum // inferred from electronic annotation /// NM_194461 // GO:0005789 // endoplasmic reticulum membrane // inferred from electronic annotation /// NM_194461 // GO:0005789 // endoplasmic reticulum membrane // not recorded /// NM_194461 // GO:0016020 // membrane // inferred from electronic annotation /// NM_194461 // GO:0016021 // integral to membrane /…	NM_194461 // GO:0008374 // O-acyltransferase activity // not recorded /// NM_194461 // GO:0008415 // acyltransferase activity // inferred from electronic annotation /// NM_194461 // GO:0016746 // transferase activity, transferring acyl groups // inferred from electronic annotation /// ENSRNOT00000029769 // GO:0008374 // O-acyltransferase activity // not recorded /// ENSRNOT00000029769 // GO:00084…	---
Fam58b	family with sequence similarity 58, member B, mRNA (cDNA clone MGC:116062 IMAGE:7376750), complete cds.	2.42106	-1.85915		2.42106			BC097941	---	---	NM_001025412 // Fam58b // family with sequence similarity 58, member B // 10q25 // 303321 /// ENSRNOT00000011019 // Fam58b // family with sequence similarity 58, member B // 10q25 // 303321 /// BC097941 // Fam58b // family with sequence similarity 58, member B // 10q25 // 303321	NM_001025412 // RefSeq // Rattus norvegicus family with sequence similarity 58, member B (Fam58b), mRNA. // chr10 // 100 // 100 // 26 // 26 // 0 /// ENSRNOT00000011019 // ENSEMBL // Cyclin-related protein FAM58A gene:ENSRNOG00000022582 // chr10 // 100 // 38 // 10 // 10 // 0 /// BC097941 // GenBank // Rattus norvegicus family with sequence similarity 58, member B, mRNA (cDNA clone MGC:116062 IMAGE…	---	---	NM_001025412 // GO:0005515 // protein binding // inferred from electronic annotation /// ENSRNOT00000011019 // GO:0005515 // protein binding // inferred from electronic annotation /// BC097941 // GO:0005515 // protein binding // inferred from electronic annotation	---
Gsta4	glutathione S-transferase alpha 4 (Gsta4), mRNA.	2.56486	-1.85809	2.32609	4.05247	-1.85809	2.32609	NM_001106840	---	---	NM_001106840 // Gsta4 // glutathione S-transferase alpha 4 // 8q31 // 300850 /// ENSRNOT00000012348 // Gsta4 // glutathione S-transferase alpha 4 // 8q31 // 300850 /// BC157819 // Gsta4 // glutathione S-transferase alpha 4 // 8q31 // 300850	NM_001106840 // RefSeq // Rattus norvegicus glutathione S-transferase alpha 4 (Gsta4), mRNA. // chr8 // 100 // 100 // 12 // 12 // 0 /// ENSRNOT00000012348 // ENSEMBL // Glutathione S-transferase alpha-4 gene:ENSRNOG00000030449 // chr8 // 100 // 100 // 12 // 12 // 0 /// BC157819 // GenBank // Rattus norvegicus glutathione S-transferase alpha 4, mRNA (cDNA clone MGC:188402 IMAGE:5621777), complete …	NM_001106840 // GO:0006805 // xenobiotic metabolic process // inferred from direct assay /// NM_001106840 // GO:0008152 // metabolic process // inferred from electronic annotation /// ENSRNOT00000012348 // GO:0006805 // xenobiotic metabolic process // inferred from direct assay /// ENSRNOT00000012348 // GO:0008152 // metabolic process // inferred from electronic annotation /// BC157819 // GO:0006…	NM_001106840 // GO:0005737 // cytoplasm // inferred from electronic annotation /// ENSRNOT00000012348 // GO:0005737 // cytoplasm // inferred from electronic annotation /// BC157819 // GO:0005737 // cytoplasm // inferred from electronic annotation	NM_001106840 // GO:0004364 // glutathione transferase activity // inferred from direct assay /// NM_001106840 // GO:0008144 // drug binding // inferred from direct assay /// NM_001106840 // GO:0016740 // transferase activity // inferred from electronic annotation /// NM_001106840 // GO:0043295 // glutathione binding // inferred from direct assay /// ENSRNOT00000012348 // GO:0004364 // glutathione…	---															1.51877					1.51877
Fam122a	family with sequence similarity 122A, mRNA (cDNA clone MGC:93708 IMAGE:7106028), complete cds.	1.81951	-1.85278			-1.85278		BC078922	---	---	BC078922 // Fam122a // family with sequence similarity 122A // 1q51 // 309420	BC078922 // GenBank // Rattus norvegicus family with sequence similarity 122A, mRNA (cDNA clone MGC:93708 IMAGE:7106028), complete cds. // chr1 // 100 // 100 // 25 // 25 // 0	---	---	---	---
[truncated: 1,487 more rows]

## Sheet: Reversed by GGF2
UNIQID	Name	MI vs. Sham	GGF2 vs. MI	GGF2 vs. Sham	MI vs. Sham	NRG vs. MI	NRG vs. Sham	mRNA Accession	Pathway Source	Pathway Name	gene_assignment	mrna_assignment	GO_biological_process	GO_cellular_component	GO_molecular_function	pathway	Fold-Change(Patientvs.Control)	Viral vs. normal	Familial vs. normal	Idiopathic dilated vs. normal	Ischemic vs. normal	LV hypertrophic vs. normal	Postpartum vs. normal	AS vs. Normal	CCMP vs. Normal	ischemic EH vs. unused donor	ischemic pre-LVAD vs. unused donor	non-ischemic EH vs. unused donor	non-ischemic pre-LVA vs. unused donor	idiopathic	Ischemic	Human	Protein-MI	Protein-GGF2	Function
[truncated: 853 more rows]
